# Supplementary material for: Chiral bifunctional bisphosphine enabled enantioselective tandem Michael addition of tryptamine-derived oxindoles to ynones
Source: Royal Society of Chemistry journal article supplement (doi:10.1039/c9cc04357h), 2019-01-01

## Supporting Information

### Chiral Bifunctional Bisphosphine Enabled Enantioselective Tandem Michael Addition of Tryptamine-Derived Oxindoles to Ynones

Tiantian Cong,<sup>a</sup> Huamin Wang,<sup>a</sup> Xiuzheng Li,<sup>c</sup> Hai-Hong Wu<sup>\*a</sup> and Junliang Zhang<sup>\*ab</sup>

#### Table of Contents

|                                                                            |     |
|----------------------------------------------------------------------------|-----|
| 1. General Information.....                                                | S2  |
| 2. Optimization of reaction conditions.....                                | S2  |
| 3. Typical Procedure for Enantioselective Tandem Michael Addition<br>..... | S3  |
| 4. Single Crystal X-ray Crystallography of 3y .....                        | S3  |
| 5. Control Experiments .....                                               | S4  |
| 6. Preparation of the Substrates .....                                     | S6  |
| 7. References.....                                                         | S8  |
| 8. General Datas .....                                                     | S8  |
| 9. HPLC Spectra .....                                                      | S28 |
| 10. NMR Spectra.....                                                       | S56 |

## 1. General Information

Unless otherwise noted, all reactions were carried out under a nitrogen atmosphere; materials obtained from commercial suppliers were used directly without further purification. The  $[\alpha]_D$  was recorded using PolAAr 3005 High Accuracy Polarimeter.  $^1\text{H}$  NMR spectra and  $^{13}\text{C}$  NMR spectra were recorded on a Bruker 300 MHz, 400 MHz or 500 MHz spectrometer in chloroform- $\text{d}_3$ .  $^{19}\text{F}$  NMR spectra were recorded on a Bruker 300 MHz or 400 MHz spectrometer in chloroform- $\text{d}_3$ . Chemical shifts (in ppm) were referenced to tetramethylsilane ( $\delta = 0$  ppm) in  $\text{CDCl}_3$  as an internal standard.  $^{13}\text{C}$ -NMR spectra were obtained by using the same NMR spectrometers and were calibrated with  $\text{CDCl}_3$  ( $\delta = 77.00$  ppm). The data is being reported as (s = singlet, d = doublet, dd = doublet of doublet, t = triplet, m = multiplet or unresolved, br = broad signal, coupling constant(s) in Hz, integration).

Reactions were monitored by thin layer chromatography (TLC) using silicycle pre-coated silica gel plates. Flash column chromatography was performed on silica gel 60 (particle size 200-400 mesh ASTM, purchased from Yantai, China) and eluted with petroleum ether/ethyl acetate.

## 2. Optimization of reaction conditions

**Table S1. The Screening of Ligands and Additives for the Model Reaction<sup>a</sup>**

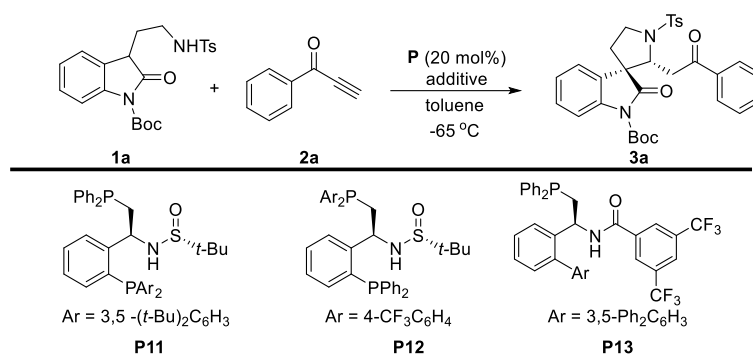

| Entry | Cat.       | Solvent | T (°C) | Additive | Yield <sup>b</sup> (%) | ee <sup>c</sup> (%) |
|-------|------------|---------|--------|----------|------------------------|---------------------|
| 1     | <b>P11</b> | toluene | -65    | -        | 68                     | 23                  |
| 2     | <b>P12</b> | toluene | -65    | -        | 78                     | 3                   |
| 3     | <b>P13</b> | toluene | -65    | -        | 75                     | 81                  |
| 7     | <b>P5</b>  | toluene | -65    | 4 Å MS   | 73                     | 94                  |
| 8     | <b>P5</b>  | toluene | -65    | 3 Å MS   | 65                     | 81                  |
| 9     | <b>P5</b>  | toluene | -65    | 5 Å MS   | 79                     | 92                  |
| 11    | <b>P13</b> | toluene | -65    | 4 Å MS   | 75                     | 85                  |

<sup>a</sup>Unless otherwise noted, all reactions were performed with **1a** (0.1 mmol), **2a** (0.12 mmol), catalyst (0.02 mmol) in solvent (1 mL). <sup>b</sup>Isolated yields of major diastereomer.

<sup>c</sup>Determined by HPLC analysis using a chiral stationary phase.

### 3. Typical Procedure for Enantioselective Tandem Michael Addition

Dry toluene (1.0 mL) was added into a dry reaction tube with the mixture of oxindole **1** (0.10 mmol), chiral biphosphine catalyst **P5** (0.02 mmol) and activated 4 Å MS. After that, ynone **2** (0.12 mmol) were added and the mixture was stirred at -65 °C under dry N<sub>2</sub> until TLC showed the starting material was no longer consumed. The reaction mixture was directly purified by column chromatography on silica gel with EtOAc/petroleum ether to afford the addition product **3**.

### 4. Single Crystal X-ray Crystallography of **3y**

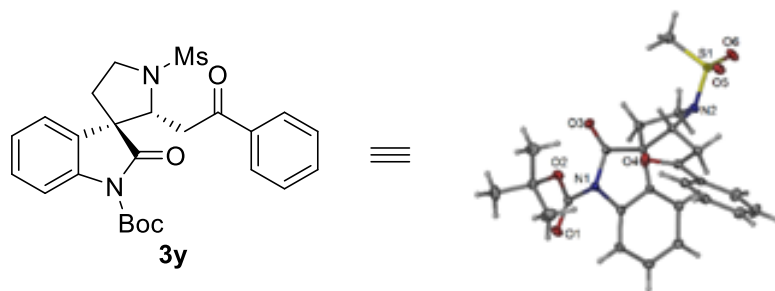

## 5. Control Experiments

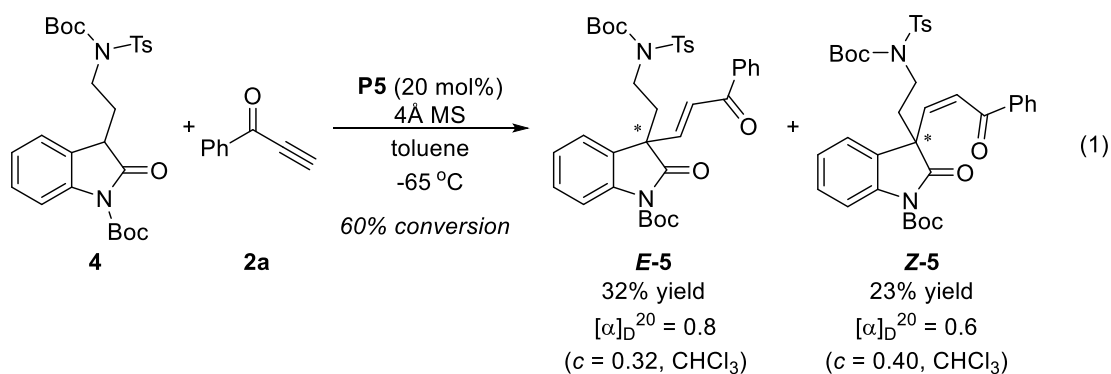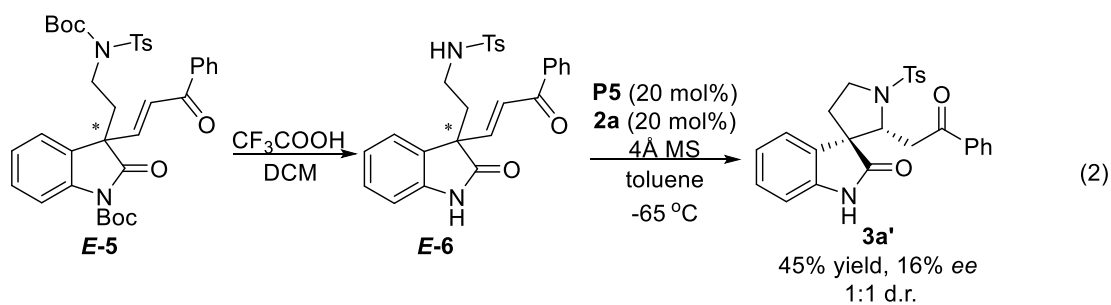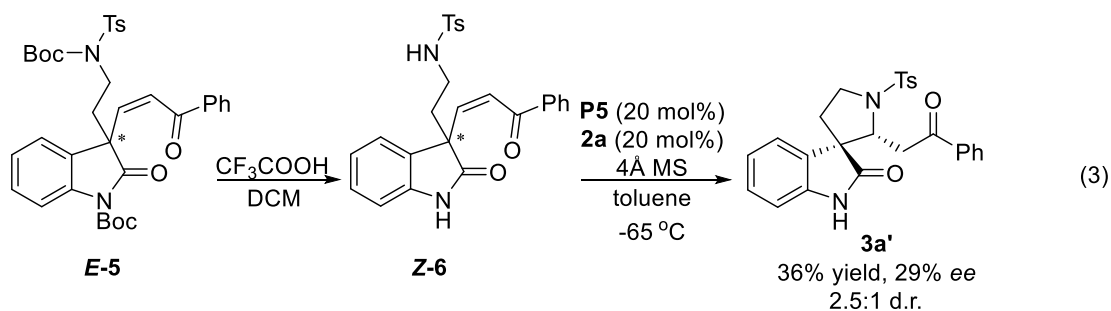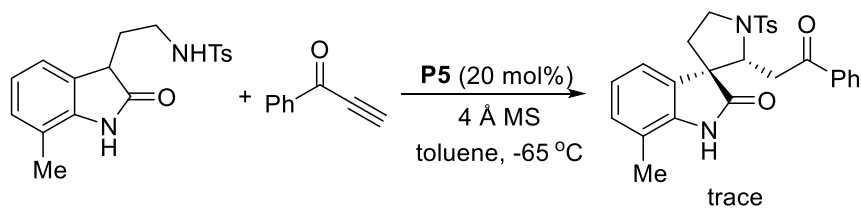

Dry toluene (1.0 mL) was added into a dry reaction tube with the mixture of N-



Boc protected oxindole **4** (0.10 mmol), chiral phosphine catalyst (0.02 mmol) and activated 4Å MS. After that, ynone **2a** (0.12 mmol) were added and the mixture was stirred at -65 °C under dry N<sub>2</sub> until TLC showed the starting material was no longer consumed. The reaction mixture was directly purified by column chromatography on silica gel with EtOAc/petroleum ether to afford the addition product **E-5**. and **Z-5**.

CF<sub>3</sub>COOH was added into the solution of addition product **5** or **6** in DCM. Until the starting material was no longer consumed, this reaction was diluted with saturated NaHCO<sub>3</sub>. The aqueous layer was separated and extracted with DCM (three times). After the combined organic layer was dried over Na<sub>2</sub>SO<sub>4</sub>, the solvent was removed in vacuo. The residue was purified by silica gel column chromatography (eluent: hexane/EtOAc) to obtain the **Z-6/E-6**.

Dry toluene (1.0 mL) was added into a dry reaction tube with the mixture of **Z-6/E-6** (0.10 mmol), chiral phosphine catalyst (20 mol%) ynone **2a** (20 mol%) and activated 4Å MS. The mixture was stirred at -65 °C under dry N<sub>2</sub> for 72 h. The reaction mixture was directly purified by column chromatography on silica gel with EtOAc/petroleum ether to afford the addition product **3a'**.

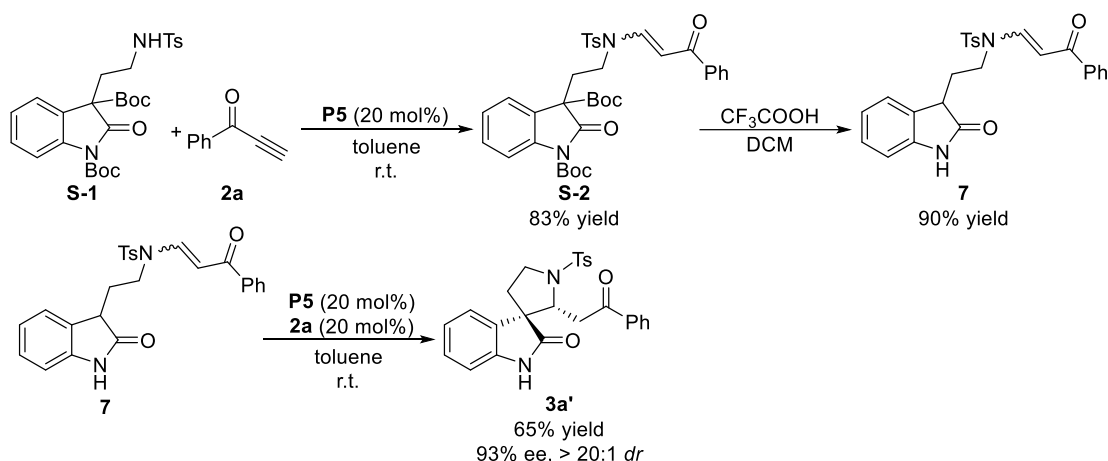

Dry toluene (3.0 mL) was added into a dry reaction tube with the mixture of C3-Boc protected oxindole **S-1** (0.30 mmol) and chiral phosphine catalyst (0.06 mmol). After that, ynone **2a** (0.36 mmol) were added and the mixture was stirred under dry N<sub>2</sub> until TLC showed the starting material was no longer consumed. The reaction mixture was directly purified by column chromatography on silica gel with EtOAc/petroleum ether to afford the addition product **S-2**.

CF<sub>3</sub>COOH was added into the solution of addition product **S-2** in DCM. Until the starting material was no longer consumed, this reaction was diluted with saturated NaHCO<sub>3</sub>. The aqueous layer was separated and extracted with DCM (three times). After the combined organic layer was dried over Na<sub>2</sub>SO<sub>4</sub>, the solvent was removed in vacuo. The residue was purified by silica gel column chromatography (eluent: hexane/EtOAc) to obtain **7**.

Dry toluene (1.0 mL) was added into a dry reaction tube with the mixture of **Z-/E-7** (0.10 mmol), chiral phosphine catalyst (20 mol%) ynone **2a** (20 mol%) and activated 4Å MS. The mixture was stirred at -65 °C under dry N<sub>2</sub> for 72 h. The reaction mixture

was directly purified by column chromatography on silica gel with EtOAc/petroleum ether to afford the addition product **3a'**.

## 6. Preparation of the Substrates

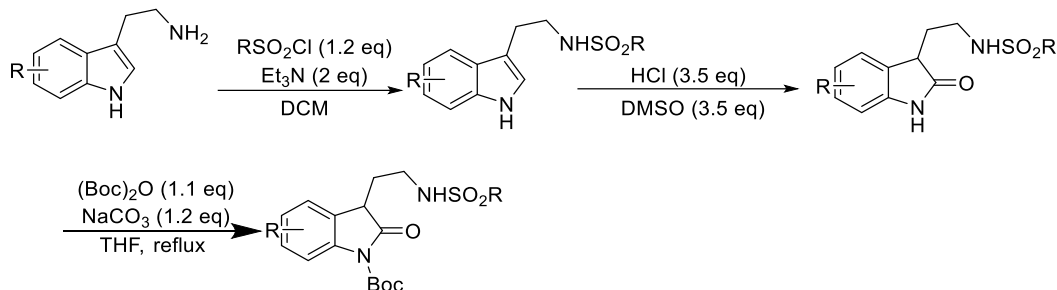

Et<sub>3</sub>N (2.0 equiv.) was added to a suspension of tryptamine (1.0 equiv.) in CH<sub>2</sub>Cl<sub>2</sub> (1.0 M). The mixture was cooled to 0 °C, and then, corresponding sulfonyl chloride (1.2 equiv.) was added. The reaction was allowed to slowly warm to room temperature until the starting material disappeared (monitored by TLC). The mixture was diluted with CH<sub>2</sub>Cl<sub>2</sub>, washed with water and brine, and dried with anhydrous Na<sub>2</sub>SO<sub>4</sub>. The solvent was removed in vacuo and the residue was purified by crystallization from petroleum ether/DCM to obtain product.

12 M HCl (3.5 equiv.) was added dropwise to a mixture of the last step product (1.0 equiv.) in DMSO (3.5 equiv.). The reaction was stirred for overnight at room temperature. After that, it was neutralized with saturated aqueous NaHCO<sub>3</sub>. The solid was washed with water and brine. And then the solvent was removed in vacuo to provide crude product<sup>[1]</sup>.

Di-*tert*-butyl dicarbonate (1.1 equiv.) was added to a solution of tryptamine-derived oxindole (10 mmol) and Na<sub>2</sub>CO<sub>3</sub> (1.1 equiv.) in THF (50 mL) at 0 °C. Then after the reaction was stirred under the reflux conditions for 1 h, 1 M HCl aq. was added. The aqueous layer was separated and extracted with EtOAc (three times). After the combined organic layer was dried over MgSO<sub>4</sub>, the solvent was removed in vacuo. The residue was purified by silica gel column chromatography (eluent: hexane/EtOAc) to obtain the N-Boc-tryptamine-derived oxindole **1**<sup>[2]</sup>.

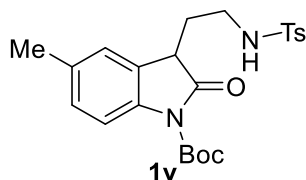

### ***tert*-butyl 5-methyl-3-(2-((4-methylphenyl)sulfonamido)ethyl)-2-oxindoline-1-carboxylate (**1v**)**

white solid (67% yield); <sup>1</sup>H NMR (400 MHz, CDCl<sub>3</sub>) δ 7.74 (d, *J* = 8.1 Hz, 2H), 7.63 (d, *J* = 8.3 Hz, 1H), 7.28 (d, *J* = 7.9 Hz, 2H), 7.08 (d, *J* = 8.2 Hz, 1H), 6.98 (s, 1H), 5.35 (d, *J* = 5.5 Hz, 1H), 3.59-3.56 (m, 1H), 3.23-3.13 (m, 2H), 2.41 (s, 3H), 2.33 (s, 3H), 2.18 (dd, *J* = 13.9, 6.6 Hz, 1H), 1.98 (dd, *J* = 13.6, 7.5 Hz, 1H), 1.62 (s, 9H). <sup>13</sup>C NMR (101 MHz, CDCl<sub>3</sub>) δ 176.46, 149.05, 143.36, 137.44, 136.96, 134.21, 129.74, 128.79,

127.10, 127.01, 124.30, 114.83, 84.39, 43.33, 40.28, 31.23, 28.10, 21.54, 21.04; HRMS (ESI)  $m/z$  calcd for  $C_{23}H_{28}N_2NaO_5S$   $[M+Na]^+ = 467.1611$ , found 467.1604.

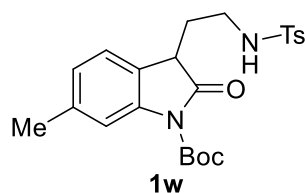

***tert*-butyl 6-methyl-3-(2-((4-methylphenyl)sulfonamido)ethyl)-2-oxoindoline-1-carboxylate (1w)**

Yellow solid (62% yield);  $^1H$  NMR (400 MHz,  $CDCl_3$ )  $\delta$  7.72 (d,  $J = 8.2$  Hz, 2H), 7.63 (s, 1H), 7.28-7.26 (m, 2H), 7.05 (d,  $J = 7.6$  Hz, 1H), 6.95 (d,  $J = 7.6$  Hz, 1H), 5.25 (t,  $J = 6.2$  Hz, 1H), 3.58-3.58 (m, 1H), 3.20-3.14 (m, 2H), 2.41 (s, 3H), 2.37 (s, 3H), 2.20-2.12 (m, 1H), 2.04-1.94 (m, 1H), 1.63 (s, 9H).  $^{13}C$  NMR (101 MHz,  $CDCl_3$ )  $\delta$  176.48, 149.18, 143.34, 139.91, 138.42, 137.06, 129.71, 127.07, 125.10, 123.98, 123.32, 115.80, 84.43, 43.22, 40.31, 31.31, 28.08, 21.90, 21.47. HRMS (ESI)  $m/z$  calcd for  $C_{23}H_{28}N_2NaO_5S$   $[M+Na]^+ = 467.1611$ , found 467.1604.

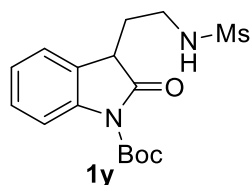

***tert*-butyl 3-(2-(methylsulfonamido)ethyl)-2-oxoindoline-1-carboxylate (1y)**

yellow liquid (50% yield);  $^1H$  NMR (400 MHz,  $CDCl_3$ )  $\delta$  7.75 (d,  $J = 8.1$  Hz, 1H), 7.30 (dd,  $J = 12.2, 7.7$  Hz, 2H), 7.16 (t,  $J = 7.4$  Hz, 1H), 5.61 (t,  $J = 6.2$  Hz, 1H), 3.72 (t,  $J = 6.4$  Hz, 1H), 3.33 (dd,  $J = 13.1, 6.6$  Hz, 2H), 2.93 (s, 3H), 2.29-2.15 (m, 2H), 1.63 (s, 9H).  $^{13}C$  NMR (101 MHz,  $CDCl_3$ )  $\delta$  176.58, 148.97, 139.82, 128.30, 127.07, 124.60, 123.90, 115.02, 84.55, 43.16, 40.12, 39.74, 39.71, 31.42, 28.07; HRMS (ESI)  $m/z$  calcd for  $C_{16}H_{22}N_2NaO_5S$   $[M+Na]^+ = 377.1142$ , found 377.1134.

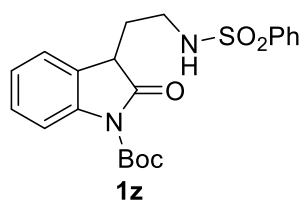

***tert*-butyl 2-oxo-3-(2-(phenylsulfonamido)ethyl)indoline-1-carboxylate (1z)**

yellow solid (53% yield);  $^1H$  NMR (400 MHz,  $CDCl_3$ )  $\delta$  7.86-7.84 (m, 2H), 7.77 (d,  $J = 8.2$  Hz, 1H), 7.57-7.53 (m, 1H), 7.51-7.47 (m, 2H), 7.31-7.27 (m, 1H), 7.20-7.12 (m, 2H), 5.41 (t,  $J = 6.3$  Hz, 1H), 3.63 (dd,  $J = 7.7, 5.6$  Hz, 1H), 3.25-3.15 (m, 2H), 2.24-2.18 (m, 1H), 2.06-1.99 (m, 1H), 1.63 (s, 9H).  $^{13}C$  NMR (101 MHz,  $CDCl_3$ )  $\delta$  176.33, 149.00, 139.93, 139.87, 132.63, 129.16, 128.41, 127.02, 126.99, 124.58, 123.68, 115.09, 84.62, 43.35, 40.30, 31.23, 28.10; HRMS (ESI)  $m/z$  calcd for  $C_{21}H_{24}N_2NaO_5S$   $[M+Na]^+ = 439.1298$ , found 439.1304.

The spectrum data and the preparation methods of **1a**<sup>[2]</sup>, **2a-2n**<sup>[3]</sup>, **2p-2r**<sup>[4]</sup>, **2s-2t**<sup>[5]</sup> are consistent with the references.

## 7. References

- [1] Nibbs, A. E.; Montgomery, T. D.; Zhu, Y. Rawal, V. H. *J. Org. Chem.* **2015**, *80*, 4928-4941.
- [2] Takizawa, S.; Kishi, K.; Kusaba, M.; Bai, J. F.; Suzuki, T.; Sasai, H. *Heterocycles* **2017**, *95*, 761-67.
- [3] Zheng, M.; Wu, F.; Chen, K.; Zhu, S. *Org. Lett.* **2016**, *18*, 3554-3557.
- [4] Ge, G.-C.; Mo, D.-L.; Ding, C.-H.; Dai, L.-X.; Hou, X.-L. *Org. Lett.* **2012**, *14*, 5756 -5759.
- [5] Heissa, C.; Phillips, R. S. *J. Chem. Soc., Perkin Trans. 1*, 2000, 2821-2825.

## 8. General Datas

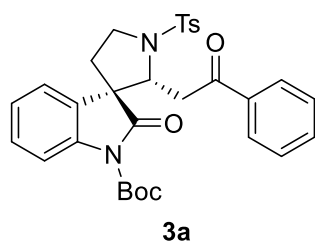

### ***tert*-butyl (2'*R*,3*R*)-2-oxo-2'-(2-oxo-2-phenylethyl)-1'-tosyl spiro[indoline-3,3'-pyrrolidine]-1-carboxylate (**3a**)**

This compound was prepared according to the general procedure as a yellow liquid in 3 days (36.2 mg, 77% yield for major diastereoisomer in 0.1 mmol scale) and was isolated as a major diastereoisomer (>20:1 dr).

$[\alpha]_D^{20} = -69.5$  ( $c = 0.310$ ,  $\text{CHCl}_3$ ).

Enantiomeric excess was found to be 94% by chiral HPLC (ChiralPak AD-H column, hexane/*i*-PrOH = 90:10, 254 nm, 1.0 mL/min, first peak:  $t_R = 14.30$  min, second peak:  $t_R = 26.68$  min ).

$^1\text{H}$  NMR (500 MHz,  $\text{CDCl}_3$ )  $\delta$  7.86 (d,  $J = 8.2$  Hz, 2H), 7.72 (d,  $J = 8.1$  Hz, 1H), 7.60-7.59 (m, 2H), 7.46-7.40 (m, 3H), 7.31 (t,  $J = 7.8$  Hz, 2H), 7.25 (s, 1H), 7.15-7.12 (m, 1H), 7.03-7.00 (m, 1H), 4.52 (dd,  $J = 10.2, 4.1$  Hz, 1H), 3.96 (dd,  $J = 18.4, 4.1$  Hz, 1H), 3.85-3.79 (m, 1H), 3.73-3.68 (m, 2.9 Hz, 1H), 3.35 (dd,  $J = 18.4, 10.3$  Hz, 1H), 2.47 (s, 3H), 1.92-1.86 (m, 1H), 1.79-1.75 (m, 1H), 1.66 (s, 9H).

$^{13}\text{C}$  NMR (126 MHz,  $\text{CDCl}_3$ )  $\delta$  197.36, 175.81, 149.18, 144.32, 139.67, 136.05, 133.06, 132.93, 130.11, 128.89, 128.30, 128.08, 127.95, 127.63, 124.09, 123.85, 115.72, 84.35, 63.82, 57.25, 48.60, 42.75, 37.37, 28.12, 21.69.

HRMS (ESI)  $m/z$  calcd for  $\text{C}_{31}\text{H}_{32}\text{N}_2\text{NaO}_6\text{S}$   $[\text{M}+\text{Na}]^+ = 583.1873$ , found 583.1181.

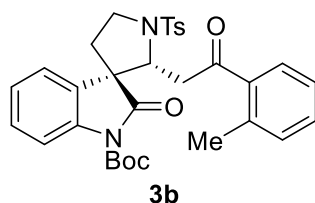

***tert*-butyl (2'*R*,3*R*)-2-oxo-2'-(2-oxo-2-(*o*-tolyl)ethyl)-1'-tosyl spiro[indoline-3,3'-pyrrolidine]-1-carboxylate (3b)**

This compound was prepared according to the general procedure as a yellow liquid in 3 days (50.3 mg, 88% yield for major diastereoisomer in 0.1 mmol scale) and was isolated as a major diastereoisomer (>20:1 dr).

$[\alpha]_{\text{D}}^{20} = -62.7$  ( $c = 0.330$ ,  $\text{CHCl}_3$ ).

Enantiomeric excess was found to be 95% by chiral HPLC (ChiralPak AD-H column, hexane/*i*-PrOH = 90:10, 254 nm, 1.0 mL/min, first peak:  $t_{\text{R}} = 15.79$  min, second peak:  $t_{\text{R}} = 19.41$  min).

$^1\text{H}$  NMR (400 MHz,  $\text{CDCl}_3$ )  $\delta$  7.88 (d,  $J = 8.2$  Hz, 1H), 7.79 (d,  $J = 8.2$  Hz, 1H), 7.41 (d,  $J = 8.1$  Hz, 1H), 7.33 (d,  $J = 7.7$  Hz, 1H), 7.26 (t,  $J = 3.9$  Hz, 1H), 7.21 (dd,  $J = 13.8$ , 5.6 Hz, 1H), 7.13-7.03 (m, 2H), 4.54 (dd,  $J = 10.4$ , 4.0 Hz, 1H), 4.00 (dd,  $J = 18.8$ , 4.0 Hz, 1H), 3.83-3.68 (m, 1H), 3.26 (dd,  $J = 18.8$ , 10.5 Hz, 1H), 2.47 (s, 1H), 2.11 (s, 1H), 1.89-1.83 (m, 1H), 1.77-1.72 (m, 1H), 1.64 (s, 5H).  $^{13}\text{C}$  NMR (101 MHz,  $\text{CDCl}_3$ )  $\delta$  200.74, 175.85, 149.15, 144.23, 139.75, 138.34, 136.12, 133.28, 131.75, 131.47, 130.08, 128.88, 128.64, 128.13, 128.07, 125.50, 124.13, 123.87, 115.76, 84.31, 63.87, 57.23, 48.54, 45.52, 37.71, 28.09, 21.62, 20.92. HRMS (ESI)  $m/z$  calcd for  $\text{C}_{32}\text{H}_{34}\text{N}_2\text{NaO}_6\text{S}$   $[\text{M}+\text{Na}]^+ = 597.2030$ , found 597.2022.

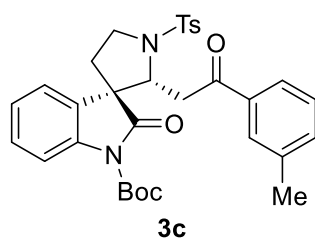

***tert*-butyl (2'*R*,3*R*)-2-oxo-2'-(2-oxo-2-(*m*-tolyl)ethyl)-1'-tosyl spiro[indoline-3,3'-pyrrolidine]-1-carboxylate (3c)**

This compound was prepared according to the general procedure as a yellow liquid in 3 days (41.8 mg, 70% yield for major diastereoisomer in 0.1 mmol scale) and was isolated as a major diastereoisomer (>20:1 dr).

$[\alpha]_{\text{D}}^{20} = -85.2$  ( $c = 0.330$ ,  $\text{CHCl}_3$ ).

Enantiomeric excess was found to be 96% by chiral HPLC (ChiralPak IA column, hexane/*i*-PrOH = 90:10, 254 nm, 1.0 mL/min, first peak:  $t_{\text{R}} = 11.98$  min, second peak:  $t_{\text{R}} = 17.21$  min).

$^1\text{H}$  NMR (400 MHz,  $\text{CDCl}_3$ )  $\delta$  7.86 (d,  $J = 8.2$  Hz, 2H), 7.72 (d,  $J = 8.2$  Hz, 1H), 7.42-7.39 (m, 4H), 7.27-7.25 (m, 2H), 7.21-7.11 (m, 2H), 7.03 (t,  $J = 7.5$  Hz, 1H), 4.51 (dd,  $J = 10.2$ , 4.1 Hz, 1H), 3.97 (dd,  $J = 4.1$  Hz, 1H), 3.80 (dd,  $J = 10.8$ , 6.0 Hz, 1H), 3.73-3.69 (m, 1H), 3.33 (dd,  $J = 18.4$ , 10.3 Hz, 1H), 2.47 (s, 3H), 2.31 (s, 3H), 1.93-1.85 (m, 1H), 1.79-1.76 (m, 1H), 1.65 (s, 9H).

$^{13}\text{C}$  NMR (101 MHz,  $\text{CDCl}_3$ )  $\delta$  197.54, 175.77, 149.17, 144.29, 139.67, 137.99, 136.14, 133.81, 132.97, 130.09, 128.85, 128.20, 128.08, 128.00, 124.81, 124.07, 123.85, 115.69, 84.31, 63.81, 57.26, 48.56, 42.74, 37.37, 28.12, 21.68, 21.28.

HRMS (ESI)  $m/z$  calcd for  $\text{C}_{32}\text{H}_{34}\text{N}_2\text{NaO}_6\text{S}$   $[\text{M}+\text{Na}]^+ = 597.2030$ , found 597.2028.

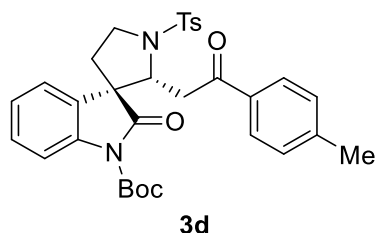

***tert*-butyl (2'*R*,3*R*)-2-oxo-2'-(2-oxo-2-(*p*-tolyl)ethyl)-1'-tosyl spiro[indoline-3,3'-pyrrolidine]-1-carboxylate (**3d**)**

This compound was prepared according to the general procedure as a yellow liquid in 3 days (47.5 mg, 79% yield for major diastereoisomer in 0.1 mmol scale) and was isolated as a major diastereoisomer (3:1 dr).

$[\alpha]_{\text{D}}^{20} = -76.8$  ( $c = 0.330$ ,  $\text{CHCl}_3$ ).

Enantiomeric excess was found to be 94% by chiral HPLC (ChiralPak IA column, hexane/*i*-PrOH = 90:10, 254 nm, 1.0 mL/min, first peak:  $t_{\text{R}} = 15.96$  min, second peak:  $t_{\text{R}} = 30.62$  min).

$^1\text{H}$  NMR (400 MHz,  $\text{CDCl}_3$ )  $\delta$  7.86 (d,  $J = 8.2$  Hz, 2H), 7.72 (d,  $J = 8.2$  Hz, 1H), 7.51 (d,  $J = 8.1$  Hz, 2H), 7.41 (d,  $J = 8.1$  Hz, 2H), 7.25 (d,  $J = 8.9$  Hz, 1H), 7.18-7.07 (m, 3H), 7.02 (t,  $J = 7.5$  Hz, 1H), 4.50 (dd,  $J = 10.3, 4.0$  Hz, 1H), 3.95 (dd,  $J = 18.4, 4.0$  Hz, 1H), 3.85-3.78 (m, 1H), 3.75 – 3.65 (m, 1H), 3.33 (dd,  $J = 18.4, 10.4$  Hz, 1H), 2.47 (s, 3H), 2.33 (s, 3H), 1.91-1.84 (m, 1H), 1.80-1.73 (m, 1H), 1.66 (s, 9H).

$^{13}\text{C}$  NMR (101 MHz,  $\text{CDCl}_3$ )  $\delta$  196.92, 175.89, 149.22, 144.31, 143.87, 139.64, 133.54, 132.88, 130.12, 129.00, 128.85, 128.08, 127.97, 127.76, 124.08, 123.83, 115.71, 84.32, 63.84, 57.26, 48.59, 42.60, 37.42, 28.12, 21.71, 21.66.

HRMS (ESI)  $m/z$  calcd for  $\text{C}_{32}\text{H}_{34}\text{N}_2\text{NaO}_6\text{S}$   $[\text{M}+\text{Na}]^+ = 597.2030$ , found 597.2031.

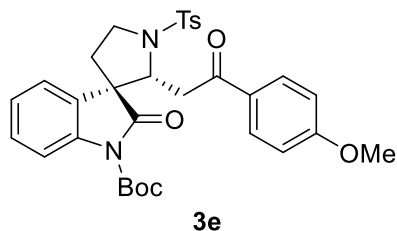

***tert*-butyl (2'*R*,3*R*)-2'-(2-(4-methoxyphenyl)-2-oxoethyl)-2-oxo-1'-tosyl spiro[indoline-3,3'-pyrrolidine]-1-carboxylate (**3e**)**

This compound was prepared according to the general procedure as a yellow liquid in 3 days (37.1 mg, 60% yield for major diastereoisomer in 0.1 mmol scale) and was isolated as a major diastereoisomer (>20:1 dr).

$[\alpha]_{\text{D}}^{25} = -78.2$  ( $c = 0.326$ ,  $\text{CHCl}_3$ ).

Enantiomeric excess was found to be 96% by chiral HPLC (ChiralPak IA column, hexane/*i*-PrOH = 90:10, 254 nm, 1.0 mL/min, first peak:  $t_{\text{R}} = 21.36$  min, second peak:  $t_{\text{R}} = 52.10$  min).

$^1\text{H}$  NMR (400 MHz,  $\text{CDCl}_3$ )  $\delta$  7.86 (d,  $J = 8.2$  Hz, 2H), 7.71 (d,  $J = 8.1$  Hz, 1H), 7.63-7.55 (m, 2H), 7.40 (d,  $J = 8.1$  Hz, 2H), 7.25 (d,  $J = 7.9$  Hz, 1H), 7.16-7.11 (m, 1H), 7.04-7.00 (m, 1H), 6.81-6.74 (m, 2H), 4.49 (dd,  $J = 10.3, 4.1$  Hz, 1H),  $\delta$  3.91 (dd,  $J =$

18.2, 4.1 Hz, 1H), 3.85-3.78 (m, 4H), 3.73-3.67 (m, 1H), 3.29 (dd,  $J = 18.2, 10.4$  Hz, 1H), 2.47 (s, 3H), 1.92-1.84 (m, 1H), 1.79-1.75 (m, 1H), 1.65 (s, 9H).

$^{13}\text{C}$  NMR (101 MHz,  $\text{CDCl}_3$ )  $\delta$  195.68, 175.80, 163.42, 149.22, 144.26, 139.70, 132.98, 130.08, 129.91, 129.19, 128.82, 128.08, 128.05, 124.02, 123.84, 115.67, 113.44, 84.25, 63.93, 57.27, 55.40, 48.60, 42.22, 37.34, 28.12, 21.66.

HRMS (ESI)  $m/z$  calcd for  $\text{C}_{32}\text{H}_{34}\text{N}_2\text{NaO}_7\text{S}$   $[\text{M}+\text{Na}]^+ = 613.1979$ , found 613.1989.

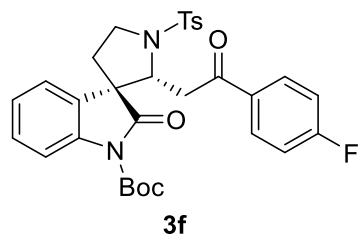

***tert*-butyl (2'*R*,3*R*)-2'-(2-(4-fluorophenyl)-2-oxoethyl)-2-oxo-1'-tosyl spiro[indoline-3,3'-pyrrolidine]-1-carboxylate (3f)**

This compound was prepared according to the general procedure as a yellow liquid in 3 days (49.5 mg, 86% yield for major diastereoisomer in 0.1 mmol scale) and was isolated as a major diastereoisomer (>20:1 dr).

$[\alpha]_{\text{D}}^{20} = -44.4$  ( $c = 0.390$ ,  $\text{CHCl}_3$ ).

Enantiomeric excess was found to be 91% by chiral HPLC (ChiralPak IA column, hexane/*i*-PrOH = 90:10, 254 nm, 1.0 mL/min, first peak:  $t_{\text{R}} = 14.69$  min, second peak:  $t_{\text{R}} = 25.71$  min).

$^1\text{H}$  NMR (400 MHz,  $\text{CDCl}_3$ )  $\delta$  7.86 (d,  $J = 8.2$  Hz, 2H), 7.71 (d,  $J = 8.2$  Hz, 1H), 7.64-7.60 (m, 2H), 7.41 (d,  $J = 8.2$  Hz, 2H), 7.26 (d,  $J = 8.5$  Hz, 1H), 7.16-7.12 (m, 1H), 7.04-6.95 (m, 3H), 4.51 (dd,  $J = 10.2, 4.2$  Hz, 1H), 3.91 (dd,  $J = 18.2, 4.2$  Hz, 1H), 3.85-3.78 (m, 1H), 3.73-3.67 (m, 1H), 3.31 (dd,  $J = 18.2, 10.2$  Hz, 1H), 2.47 (s, 3H), 1.93-1.85 (m, 1H), 1.80-1.75 (m, 1H), 1.65 (s, 9H).

$^{19}\text{F}$  NMR (282 MHz,  $\text{CDCl}_3$ )  $\delta$  -105.03.

$^{13}\text{C}$  NMR (101 MHz,  $\text{CDCl}_3$ )  $\delta$  195.77, 175.71, 165.68 (d,  $J = 254.8$  Hz), 149.15, 144.36, 139.68, 132.91, 132.48 (d,  $J = 3.0$  Hz), 130.26 (d,  $J = 9.4$  Hz), 130.11, 128.93, 128.06, 127.91, 123.98 (d,  $J = 24.0$  Hz), 115.70, 115.53, 115.32, 84.40, 63.83, 57.24, 48.62, 42.64, 37.30, 28.11, 21.67.

HRMS (ESI)  $m/z$  calcd for  $\text{C}_{31}\text{H}_{31}\text{N}_2\text{FNaO}_6\text{S}$   $[\text{M}+\text{Na}]^+ = 578.1889$ , found 578.1885.

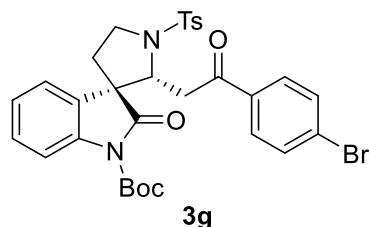

***tert*-butyl (2'*R*,3*R*)-2'-(2-(4-bromophenyl)-2-oxoethyl)-2-oxo-1'-tosyl spiro[indoline-3,3'-pyrrolidine]-1-carboxylate (3g)**

This compound was prepared according to the general procedure as a yellow liquid in 3 days (55.0 mg, 83% yield for major diastereoisomer in 0.1 mmol scale) and was

isolated as a major diastereoisomer (>20:1 dr).

$[\alpha]_{\text{D}}^{20} = -70.1$  ( $c = 0.330$ ,  $\text{CHCl}_3$ ).

Enantiomeric excess was found to be 88% by chiral HPLC (ChiralPak IA column, hexane/i-PrOH = 90:10, 254 nm, 1.0 mL/min, first peak:  $t_{\text{R}} = 17.14$  min, second peak:  $t_{\text{R}} = 34.55$  min).

$^1\text{H}$  NMR (400 MHz,  $\text{CDCl}_3$ )  $\delta$  7.85 (d,  $J = 8.3$  Hz, 2H), 7.71 (d,  $J = 8.1$  Hz, 1H), 7.45 (s, 4H), 7.41 (d,  $J = 8.0$  Hz, 2H), 7.25 (dd,  $J = 7.5, 0.8$  Hz, 1H), 7.17-7.13 (m, 1H), 7.04-7.00 (m, 1H), 4.51 (dd,  $J = 10.1, 4.2$  Hz, 1H), 3.90 (dd,  $J = 18.3, 4.2$  Hz, 1H), 3.85-3.78 (m, 1H), 3.72-3.67 (m, 1H), 3.30 (dd,  $J = 18.3, 10.2$  Hz, 1H), 2.47 (s, 3H), 1.93-1.85 (m, 1H), 1.80-1.75 (m, 1H), 1.65 (s, 9H).

$^{13}\text{C}$  NMR (101 MHz,  $\text{CDCl}_3$ )  $\delta$  196.40, 175.70, 149.11, 144.38, 139.66, 134.75, 132.88, 131.64, 130.12, 129.12, 128.99, 128.28, 128.06, 127.85, 124.15, 123.85, 115.72, 84.44, 63.74, 57.21, 48.61, 42.74, 37.29, 28.11, 21.68.

HRMS (ESI)  $m/z$  calcd for  $\text{C}_{31}\text{H}_{31}\text{N}_2\text{BrNaO}_6\text{S}$   $[\text{M}+\text{Na}]^+ = 661.0978$ , found 661.0979.

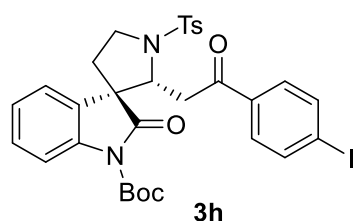

***tert*-butyl (2'*R*,3*R*)-2'-(2-(4-iodophenyl)-2-oxoethyl)-2-oxo-1'-tosylspiro[indoline-3,3'-pyrrolidine]-1-carboxylate (3h)**

This compound was prepared according to the general procedure as a yellow liquid in 3 days (55.9 mg, 79% yield for major diastereoisomer in 0.1 mmol scale) and was isolated as a major diastereoisomer (>20:1 dr).

$[\alpha]_{\text{D}}^{20} = -68.5$  ( $c = 0.460$ ,  $\text{CHCl}_3$ ).

Enantiomeric excess was found to be 90% by chiral HPLC (ChiralPak IA column, hexane/i-PrOH = 90:10, 254 nm, 1.0 mL/min, first peak:  $t_{\text{R}} = 19.15$  min, second peak:  $t_{\text{R}} = 41.46$  min).

$^1\text{H}$  NMR (400 MHz,  $\text{CDCl}_3$ )  $\delta$  7.85 (d,  $J = 8.3$  Hz, 2H), 7.69 (dd,  $J = 17.8, 8.3$  Hz, 3H), 7.41 (d,  $J = 8.1$  Hz, 2H), 7.30-7.23 (m, 3H), 7.17-7.13 (m, 1H), 7.04-7.00 (m, 1H), 4.51 (dd,  $J = 10.1, 4.2$  Hz, 1H), 3.92-3.78 (m, 2H), 3.72-3.67 (m, 1H), 3.29 (dd,  $J = 18.4, 10.2$  Hz, 1H), 2.47 (s, 3H), 1.92-1.85 (m, 1H), 1.80-1.75 (m, 1H), 1.65 (s, 9H).  $^{13}\text{C}$  NMR (101 MHz,  $\text{CDCl}_3$ )  $\delta$  196.71, 175.70, 149.11, 144.37, 139.65, 137.64, 135.27, 132.89, 130.12, 128.99, 128.06, 127.84, 124.16, 123.85, 115.72, 101.12, 84.43, 63.72, 57.20, 48.60, 42.69, 37.30, 28.12, 21.70, 21.67. HRMS (ESI)  $m/z$  calcd for  $\text{C}_{31}\text{H}_{31}\text{N}_2\text{INaO}_6\text{S}$   $[\text{M}+\text{Na}]^+ = 709.0840$ , found 709.0841.



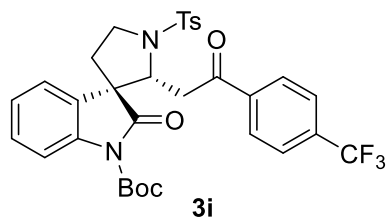

***tert*-butyl (2'*R*,3*R*)-2-oxo-2'-(2-oxo-2-(4-(trifluoromethyl)phenyl)ethyl)-1'-tosylspiro[indoline-3,3'-pyrrolidine]-1-carboxylate (3i)**

This compound was prepared according to the general procedure as a yellow liquid in 3 days (35.8 mg, 58% yield for major diastereoisomer in 0.1 mmol scale) and was isolated as a major diastereoisomer (4:1 dr).

$[\alpha]_{\text{D}}^{20} = -33.9$  ( $c = 0.330$ ,  $\text{CHCl}_3$ ).

Enantiomeric excess was found to be 58% by chiral HPLC (ChiralPak IA column, hexane/*i*-PrOH = 90:10, 254 nm, 1.0 mL/min, first peak:  $t_{\text{R}} = 14.25$  min, second peak:  $t_{\text{R}} = 32.42$  min).

$^1\text{H}$  NMR (500 MHz,  $\text{CDCl}_3$ )  $\delta$  7.86 (d,  $J = 8.2$  Hz, 2H), 7.70 (dd,  $J = 17.0, 8.1$  Hz, 3H), 7.58 (d,  $J = 8.3$  Hz, 2H), 7.42 (d,  $J = 8.0$  Hz, 2H), 7.25 (s, 1H), 7.15-7.13 (m, 1H), 7.04-7.01 (m, 1H), 4.54 (dd,  $J = 10.0, 4.2$  Hz, 1H), 3.96 (dd,  $J = 18.4, 4.3$  Hz, 1H), 3.85-3.80 (m, 1H), 3.73-3.68 (m, 1H), 3.34 (dd,  $J = 18.4, 10.0$  Hz, 1H), 2.48 (s, 3H), 1.93-1.87 (m, 1H), 1.81-1.77 (m, 1H), 1.66 (s, 9H).  $^{13}\text{C}$  NMR (126 MHz,  $\text{CDCl}_3$ )  $\delta$  196.61, 175.65, 149.09, 144.45, 139.65, 138.67, 134.34 (q,  $J = 32.7$  Hz), 132.82, 130.15, 129.06, 128.06, 127.94, 127.79, 125.43 (q,  $J = 3.6$  Hz), 124.21, 123.85, 115.77, 84.54, 63.67, 57.22, 48.61, 43.17, 37.29, 30.20, 30.15, 28.10, 21.69.  $^{19}\text{F}$  NMR (376 MHz,  $\text{CDCl}_3$ )  $\delta$  -63.21. HRMS (ESI)  $m/z$  calcd for  $\text{C}_{31}\text{H}_{31}\text{N}_3\text{NaO}_8\text{S}$   $[\text{M}+\text{Na}]^+ = 628.1724$ , found 628.1735.

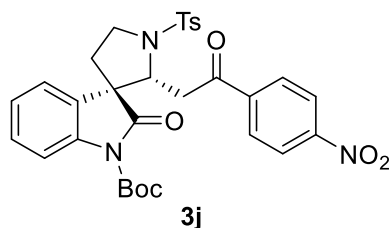

***tert*-butyl (2'*R*,3*R*)-2'-(2-(4-nitrophenyl)-2-oxoethyl)-2-oxo-1'-tosylspiro[indoline-3,3'-pyrrolidine]-1-carboxylate (3j)**

This compound was prepared according to the general procedure as a yellow liquid in 3 days (32.6 mg, 55% yield for major diastereoisomer in 0.1 mmol scale) and was isolated as a major diastereoisomer (2:1 dr).

$[\alpha]_{\text{D}}^{20} = -46.9$  ( $c = 0.330$ ,  $\text{CHCl}_3$ ).

Enantiomeric excess was found to be 29% by chiral HPLC (ChiralPak OD-H column, hexane/*i*-PrOH = 90:10, 254 nm, 1.0 mL/min, first peak:  $t_{\text{R}} = 59.84$  min, second peak:  $t_{\text{R}} = 66.30$  min).

$^1\text{H}$  NMR (500 MHz,  $\text{CDCl}_3$ )  $\delta$  8.16 (d,  $J = 8.8$  Hz, 2H), 7.85 (d,  $J = 8.2$  Hz, 2H), 7.73 (dd,  $J = 8.8, 2.4$  Hz, 3H), 7.43 (d,  $J = 8.0$  Hz, 2H), 7.27 (s, 1H), 7.17-7.14 (m, 1H), 7.03

(dd,  $J = 7.5, 7.0$  Hz, 1H), 4.56 (dd,  $J = 9.8, 4.4$  Hz, 1H), 3.96 (dd,  $J = 18.4, 4.4$  Hz, 1H), 3.84-3.81 (m, 1H), 3.73-3.68 (m, 1H), 3.34 (dd,  $J = 18.4, 9.8$  Hz, 1H), 2.48 (s, 3H), 1.94-1.88 (mz, 1H), 1.82-1.78 (m, 1H), 1.66 (s, 9H).  $^{13}\text{C}$  NMR (126 MHz,  $\text{CDCl}_3$ )  $\delta$  196.16, 175.54, 150.25, 149.04, 144.53, 140.42, 139.65, 132.76, 130.17, 129.14, 128.63, 128.05, 127.73, 124.26, 123.90, 123.61, 115.78, 84.67, 63.63, 57.20, 48.63, 43.48, 37.23, 28.11, 21.70. HRMS (ESI)  $m/z$  calcd for  $\text{C}_{32}\text{H}_{31}\text{F}_3\text{N}_2\text{NaO}_6\text{S}$   $[\text{M}+\text{Na}]^+ = 651.1747$ , found 651.1743.

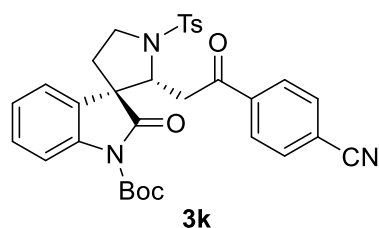

***tert*-butyl (2'*R*,3*R*)-2'-(2-(4-cyanophenyl)-2-oxoethyl)-2-oxo-1'-tosylspiro[indoline-3,3'-pyrrolidine]-1-carboxylate (3k)**

This compound was prepared according to the general procedure as a yellow liquid in 3 days (37.2 mg, 63% yield for major diastereoisomer in 0.1 mmol scale) and was isolated as a major diastereoisomer (5:1 dr).

$[\alpha]_{\text{D}}^{20} = -41.7$  ( $c = 0.380$ ,  $\text{CHCl}_3$ ).

Enantiomeric excess was found to be 34% by chiral HPLC (ChiralPak OD-3 column, hexane/*i*-PrOH = 85:15, 254 nm, 1.0 mL/min, first peak:  $t_{\text{R}} = 35.88$  min, second peak:  $t_{\text{R}} = 39.24$  min).

$^1\text{H}$  NMR (500 MHz,  $\text{CDCl}_3$ )  $\delta$  7.85 (d,  $J = 8.2$  Hz, 2H), 7.72 (d,  $J = 8.2$  Hz, 1H), 7.64 (dd,  $J = 23.4, 8.4$  Hz, 4H), 7.42 (d,  $J = 8.1$  Hz, 2H), 7.25 (s, 1H), 7.17-7.14 (m, 1H), 7.03 (t,  $J = 7.5$  Hz, 1H), 4.54 (dd,  $J = 9.8, 4.3$  Hz, 1H), 3.93 (dd,  $J = 18.4, 4.4$  Hz, 1H), 3.84-3.79 (m, 1H), 3.72-3.68 (m, 1H), 3.31 (dd,  $J = 18.4, 9.8$  Hz, 1H), 2.48 (s, 3H), 1.93-1.87 (m, 1H), 1.82-1.77 (m, 1H), 1.66 (s, 9H).  $^{13}\text{C}$  NMR (126 MHz,  $\text{CDCl}_3$ )  $\delta$  196.31, 175.54, 149.06, 144.51, 139.64, 138.94, 132.77, 132.25, 130.16, 129.11, 128.05, 128.01, 127.74, 124.24, 123.88, 117.85, 116.34, 115.77, 84.62, 63.63, 57.20, 48.61, 43.20, 37.24, 28.10, 21.69. HRMS (ESI)  $m/z$  calcd for  $\text{C}_{32}\text{H}_{31}\text{N}_3\text{NaO}_6\text{S}$   $[\text{M}+\text{Na}]^+ = 608.1826$ , found 608.1813.

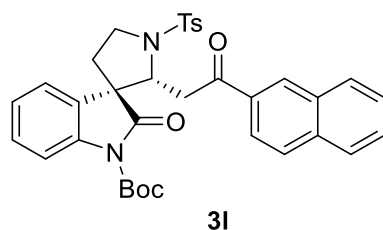

***tert*-butyl (2'*R*,3*R*)-2'-(2-(naphthalen-2-yl)-2-oxoethyl)-2-oxo-1'-tosylspiro[indoline-3,3'-pyrrolidine]-1-carboxylate (3l)**

This compound was prepared according to the general procedure as a yellow liquid in 3 days (49.5 mg, 78% yield for major diastereoisomer in 0.1 mmol scale) and was isolated as a major diastereoisomer (>20:1 dr).

$[\alpha]_D^{20} = -74.6$  ( $c = 0.330$ ,  $\text{CHCl}_3$ ).

Enantiomeric excess was found to be 96% by chiral HPLC (ChiralPak IA column, hexane/i-PrOH = 90:10, 254 nm, 1.0 mL/min, first peak:  $t_R = 16.95$  min, second peak:  $t_R = 31.75$  min).

$^1\text{H}$  NMR (400 MHz,  $\text{CDCl}_3$ )  $\delta$  8.12 (s, 1H), 7.87 (t,  $J = 8.9$  Hz, 3H), 7.79 (d,  $J = 8.0$  Hz, 1H), 7.74–7.63 (m, 3H), 7.57–7.48 (m, 2H), 7.42 (d,  $J = 8.0$  Hz, 2H), 7.29 (dd,  $J = 7.5, 1.0$  Hz, 1H), 7.08–7.04 (m, 1H), 7.00–6.95 (m, 1H), 4.58 (dd,  $J = 10.3, 4.1$  Hz, 1H), 4.12–4.07 (m, 1H), 3.88–3.81 (m, 1H), 3.76–3.70 (m, 1H), 3.51 (dd,  $J = 18.2, 10.4$  Hz, 1H), 2.47 (s, 3H), 1.95–1.87 (m, 1H), 1.82–1.77 (m, 1H), 1.66 (s, 9H).

$^{13}\text{C}$  NMR (101 MHz,  $\text{CDCl}_3$ )  $\delta$  197.25, 175.85, 149.18, 144.33, 139.70, 135.54, 133.41, 132.97, 132.24, 130.13, 129.55, 129.48, 128.91, 128.45, 128.15, 128.10, 127.97, 127.70, 126.69, 124.12, 123.89, 123.26, 115.70, 84.35, 63.97, 57.28, 48.65, 42.78, 37.36, 28.14, 21.69.

HRMS (ESI)  $m/z$  calcd for  $\text{C}_{35}\text{H}_{34}\text{N}_2\text{NaO}_6\text{S}$   $[\text{M}+\text{Na}]^+ = 633.2030$ , found 633.2025.

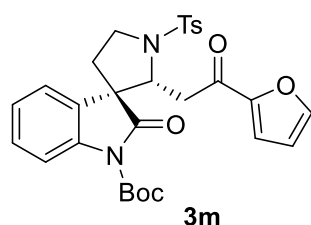

***tert*-butyl (2'*R*,3*R*)-2'-(2-(furan-2-yl)-2-oxoethyl)-2-oxo-1'-tosylspiro[indoline-3,3'-pyrrolidine]-1-carboxylate (3m)**

This compound was prepared according to the general procedure as a yellow liquid in 3 days (45.9 mg, 80% yield for major diastereoisomer in 0.1 mmol scale) and was isolated as a major diastereoisomer (>20:1 dr).

$[\alpha]_D^{20} = -60.2$  ( $c = 0.370$ ,  $\text{CHCl}_3$ ).

Enantiomeric excess was found to be 89% by chiral HPLC (ChiralPak IA column, hexane/i-PrOH = 90:10, 254 nm, 1.0 mL/min, first peak:  $t_R = 21.48$  min, second peak:  $t_R = 26.16$  min).

$^1\text{H}$  NMR (400 MHz,  $\text{CDCl}_3$ )  $\delta$  7.85 (d,  $J = 8.2$  Hz, 2H), 7.76 (d,  $J = 8.1$  Hz, 1H), 7.42 (dd,  $J = 9.2, 4.5$  Hz, 3H), 7.31–7.27 (m, 1H), 7.23–7.18 (m, 1H), 7.09–7.06 (m, 1H), 6.90 (d,  $J = 3.5$  Hz, 1H), 6.38 (dd,  $J = 3.5, 1.7$  Hz, 1H), 4.47 (dd,  $J = 9.8, 4.3$  Hz, 1H), 3.84–3.78 (m, 2H), 3.71–3.66 (m, 1H), 3.14 (dd,  $J = 18.1, 9.9$  Hz, 1H), 2.47 (s, 3H), 1.93–1.77 (m, 2H), 1.63 (s, 9H).

$^{13}\text{C}$  NMR (101 MHz,  $\text{CDCl}_3$ )  $\delta$  185.64, 175.39, 151.84, 149.07, 146.28, 144.26, 139.67, 132.89, 130.07, 128.95, 128.12, 127.86, 124.11, 123.98, 116.95, 115.62, 112.03, 84.39, 62.83, 57.26, 48.42, 42.07, 37.18, 28.09, 21.68.

HRMS (ESI)  $m/z$  calcd for  $\text{C}_{29}\text{H}_{30}\text{N}_2\text{NaO}_7\text{S}$   $[\text{M}+\text{Na}]^+ = 573.1666$ , found 573.1663.

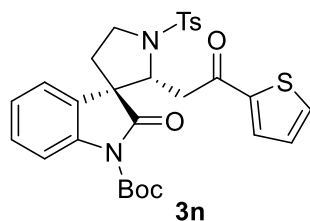

***tert*-butyl (2'*R*,3*R*)-2-oxo-2'-(2-oxo-2-(thiophen-2-yl)ethyl)-1'-tosylspiro[indoline-3,3'-pyrrolidine]-1-carboxylate (3n)**

This compound was prepared according to the general procedure as a yellow liquid in 3 days (53.9 mg, 92% yield for major diastereoisomer in 0.1 mmol scale) and was isolated as a major diastereoisomer (>20:1 dr).

$[\alpha]_{\text{D}}^{20} = -77.9$  ( $c = 0.420$ ,  $\text{CHCl}_3$ ).

Enantiomeric excess was found to be 92% by chiral HPLC (ChiralPak IA column, hexane/*i*-PrOH = 90:10, 254 nm, 1.0 mL/min, first peak:  $t_{\text{R}} = 16.76$  min, second peak:  $t_{\text{R}} = 26.15$  min).

$^1\text{H}$  NMR (400 MHz,  $\text{CDCl}_3$ )  $\delta$  7.86 (d,  $J = 8.3$  Hz, 2H), 7.70 (d,  $J = 8.1$  Hz, 1H), 7.49 (dd,  $J = 4.9, 1.0$  Hz, 1H), 7.41 (d,  $J = 8.1$  Hz, 2H), 7.37 (dd,  $J = 3.8, 1.0$  Hz, 1H), 7.29 (dd,  $J = 7.4, 0.9$  Hz, 1H), 7.18-7.14 (m, 1H), 7.09-7.05 (m, 1H), 6.96 (dd,  $J = 4.9, 3.9$  Hz, 1H), 4.48 (dd,  $J = 10.2, 4.2$  Hz, 1H), 3.90- 3.79 (m, 2H), 3.72-3.67 (m, 1H), 3.24 (dd,  $J = 17.7, 10.2$  Hz, 1H), 2.47 (s, 3H), 1.89 (ddd,  $J = 12.4, 10.4, 8.4$  Hz, 1H), 1.93-1.86 (m, 1H), 1.64 (s, 9H).

$^{13}\text{C}$  NMR (101 MHz,  $\text{CDCl}_3$ )  $\delta$  189.67, 175.46, 149.04, 144.34, 143.13, 139.76, 133.67, 132.82, 131.87, 130.11, 128.99, 128.08, 127.85, 127.80, 124.16, 123.94, 115.74, 84.35, 63.58, 57.22, 48.63, 42.92, 37.04, 28.09, 21.67.

HRMS (ESI)  $m/z$  calcd for  $\text{C}_{29}\text{H}_{30}\text{N}_2\text{NaO}_6\text{S}_2$   $[\text{M}+\text{Na}]^+ = 589.1437$ , found 589.1435.

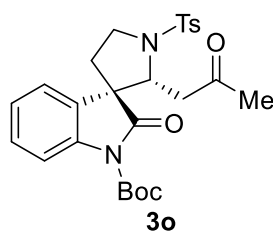

***tert*-butyl (2'*R*,3*R*)-2-oxo-2'-(2-oxopropyl)-1'-tosylspiro[indoline-3,3'-pyrrolidine]-1-carboxylate (3o)**

This compound was prepared according to the general procedure as a yellow liquid in 3 days (43.7 mg, 85% yield for major diastereoisomer in 0.1 mmol scale) and was isolated as a major diastereoisomer (5:1 dr).

$[\alpha]_{\text{D}}^{20} = -45.6$  ( $c = 0.330$ ,  $\text{CHCl}_3$ ).

Enantiomeric excess was found to be 95% by chiral HPLC (ChiralPak IA column, hexane/*i*-PrOH = 90:10, 254 nm, 1.0 mL/min, first peak:  $t_{\text{R}} = 12.51$  min, second peak:  $t_{\text{R}} = 18.83$  min).

$^1\text{H}$  NMR (400 MHz,  $\text{CDCl}_3$ )  $\delta$  7.84 (dd,  $J = 10.7, 8.4$  Hz, 3H), 7.40 (d,  $J = 8.1$  Hz, 2H), 7.35-7.21 (m, 2H), 7.21-7.17 (m, 1H), 4.33 (dd,  $J = 9.4, 4.7$  Hz, 1H), 3.80-3.60 (m, 2H),

3.39 (dd,  $J = 18.6, 4.7$  Hz, 1H), 2.72 (dd,  $J = 18.6, 9.5$  Hz, 1H), 2.46 (s, 3H), 1.89-1.81 (m, 1H), 1.78-1.73 (m, 1H), 1.71 (s, 3H), 1.63 (s, 9H).

$^{13}\text{C}$  NMR (101 MHz,  $\text{CDCl}_3$ )  $\delta$  205.61, 175.49, 149.09, 144.27, 139.70, 132.90, 130.07, 129.05, 128.04, 124.18, 123.99, 115.66, 84.50, 62.79, 57.10, 48.43, 47.24, 37.24, 29.52, 28.09, 21.68, 21.66.

HRMS (ESI)  $m/z$  calcd for  $\text{C}_{26}\text{H}_{30}\text{N}_2\text{NaO}_6\text{S}$   $[\text{M}+\text{Na}]^+ = 521.1717$ , found 521.1710.

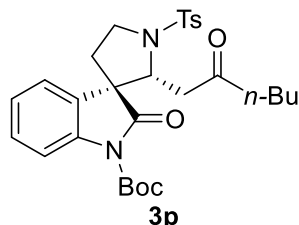

***tert*-butyl (2'*R*,3*R*)-2-oxo-2'-(2-oxohexyl)-1'-tosylspiro[indoline-3,3'-pyrrolidine]-1-carboxylate (3p)**

This compound was prepared according to the general procedure as a yellow liquid in 3 days (48.6 mg, 85% yield for major diastereoisomer in 0.1 mmol scale) and was isolated as a major diastereoisomer (>20:1 dr).

$[\alpha]_{\text{D}}^{20} = -69.0$  ( $c = 0.330$ ,  $\text{CHCl}_3$ ).

Enantiomeric excess was found to be 93% by chiral HPLC (ChiralPak IA column, hexane/*i*-PrOH = 90:10, 254 nm, 1.0 mL/min, first peak:  $t_{\text{R}} = 9.40$  min, second peak:  $t_{\text{R}} = 16.12$  min).

$^1\text{H}$  NMR (400 MHz,  $\text{CDCl}_3$ )  $\delta$  7.83 (dd,  $J = 8.1, 4.5$  Hz, 3H), 7.40 (d,  $J = 8.1$  Hz, 2H), 7.34-7.26 (m, 2H), 7.18 (dd,  $J = 10.9, 4.0$  Hz, 1H), 4.33 (dd,  $J = 10.0, 4.5$  Hz, 1H), 3.79-3.72 (m, 1H), 3.67-3.61 (m, 1H), 3.37 (dd,  $J = 18.6, 4.5$  Hz, 1H), 2.75 (dd,  $J = 18.6, 10.1$  Hz, 1H), 2.46 (s, 3H), 2.09-2.01 (m, 1H), 1.87-1.79 (m, 1H), 1.75-1.67 (m, 2H), 1.64 (s, 9H), 1.18-1.09 (m, 4H), 0.80 (t,  $J = 7.3$  Hz, 3H), 0.98-0.88 (m, 2H).

$^{13}\text{C}$  NMR (101 MHz,  $\text{CDCl}_3$ )  $\delta$  208.17, 175.61, 149.10, 144.28, 139.75, 132.91, 130.09, 128.97, 128.01, 124.14, 124.03, 115.81, 84.38, 63.10, 57.10, 48.56, 46.57, 42.10, 37.33, 30.96, 28.08, 22.89, 22.29, 21.68, 13.82.

HRMS (ESI)  $m/z$  calcd for  $\text{C}_{30}\text{H}_{38}\text{N}_2\text{NaO}_6\text{S}$   $[\text{M}+\text{Na}]^+ = 577.2343$ , found 577.2342.

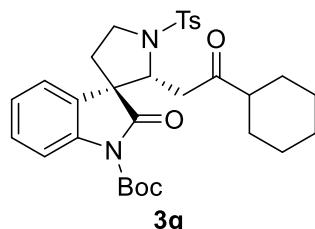

***tert*-butyl (2'*R*,3*R*)-2'-(2-cyclohexyl-2-oxoethyl)-2-oxo-1'-tosylspiro[indoline-3,3'-pyrrolidine]-1-carboxylate (3q)**

This compound was prepared according to the general procedure as a yellow liquid in 3 days (46.3 mg, 78% yield for major diastereoisomer in 0.1 mmol scale) and was isolated as a major diastereoisomer (>20:1 dr).

$[\alpha]_{\text{D}}^{20} = -50.4$  ( $c = 0.340$ ,  $\text{CHCl}_3$ ).

Enantiomeric excess was found to be 97% by chiral HPLC (ChiralPak IA column, hexane/i-PrOH = 90:10, 254 nm, 1.0 mL/min, first peak:  $t_R$  = 37.44 min, second peak:  $t_R$  = 39.36 min).

$^1\text{H}$  NMR (400 MHz,  $\text{CDCl}_3$ )  $\delta$  7.84-7.82 (m, 3H), 7.40 (d,  $J$  = 8.1 Hz, 2H), 7.32-7.24 (m, 2H), 7.17 (dd,  $J$  = 10.9, 4.1 Hz, 1H), 4.31 (dd,  $J$  = 10.4, 4.2 Hz, 1H), 3.79-3.63 (m, 2H), 3.42 (dd,  $J$  = 18.9, 4.3 Hz, 1H), 2.85 (dd,  $J$  = 18.9, 10.5 Hz, 1H), 2.46 (s, 3H), 1.85-1.77 (m, 2H), 1.71-1.57 (m, 11H), 1.50 (dd,  $J$  = 8.6, 4.6 Hz, 3H), 1.11-0.99 (m, 5H), 0.76-0.66 (m, 1H).

$^{13}\text{C}$  NMR (101 MHz,  $\text{CDCl}_3$ )  $\delta$  211.32, 175.65, 149.17, 144.27, 139.83, 133.03, 130.09, 128.86, 128.11, 127.99, 124.10, 124.02, 115.91, 84.30, 63.36, 57.10, 49.89, 48.61, 44.86, 37.48, 28.09, 27.83, 27.72, 25.63, 25.30.

HRMS (ESI)  $m/z$  calcd for  $\text{C}_{31}\text{H}_{38}\text{N}_2\text{NaO}_6\text{S}$   $[\text{M}+\text{Na}]^+ = 589.2343$ , found 589.2341.

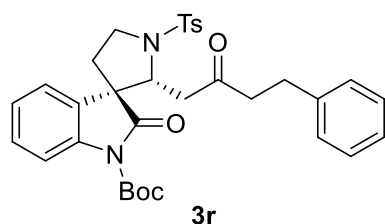

***tert*-butyl (2'*R*,3*R*)-2-oxo-2'-(2-oxo-4-phenylbutyl)-1'-tosylspiro[indoline-3,3'-pyrrolidine]-1-carboxylate (3r)**

This compound was prepared according to the general procedure as a yellow liquid in 3 days (46.0 mg, 75% yield for major diastereoisomer in 0.1 mmol scale) and was isolated as a major diastereoisomer (4:1 dr).

$[\alpha]_D^{25} = -56.3$  ( $c$  = 0.330,  $\text{CHCl}_3$ ).

Enantiomeric excess was found to be 90% by chiral HPLC (ChiralPak IA column, hexane/i-PrOH = 90:10, 254 nm, 1.0 mL/min, first peak:  $t_R$  = 13.93 min, second peak:  $t_R$  = 38.23 min).

$^1\text{H}$  NMR (400 MHz,  $\text{CDCl}_3$ )  $\delta$  7.85-7.80 (m, 3H), 7.38 (t,  $J$  = 13.7 Hz, 3H), 7.28-7.15 (m, 5H), 6.97 (d,  $J$  = 7.0 Hz, 2H), 4.35 (dd,  $J$  = 9.7, 4.7 Hz, 1H), 3.75 (dd,  $J$  = 10.8, 6.1 Hz, 1H), 3.64 (dd,  $J$  = 7.3, 4.4 Hz, 1H), 3.35 (dd,  $J$  = 18.4, 4.7 Hz, 1H), 2.72 (dd,  $J$  = 18.5, 9.6 Hz, 1H), 2.50-2.42 (m, 5H), 1.99-1.83 (m, 2H), 1.81 (d,  $J$  = 3.9 Hz, 1H), 1.76 (dd,  $J$  = 5.9, 2.8 Hz, 1H), 1.65 (s, 9H).

$^{13}\text{C}$  NMR (101 MHz,  $\text{CDCl}_3$ )  $\delta$  206.88, 175.55, 149.09, 144.32, 140.81, 139.76, 132.87, 130.10, 129.09, 128.42, 128.16, 128.07, 125.98, 124.26, 115.83, 84.49, 63.14, 57.15, 57.12, 48.61, 46.56, 43.93, 37.13, 29.03, 28.11, 28.07, 21.68.

HRMS (ESI)  $m/z$  calcd for  $\text{C}_{33}\text{H}_{36}\text{N}_2\text{NaO}_6\text{S}$   $[\text{M}+\text{Na}]^+ = 611.2186$ , found 611.2189.

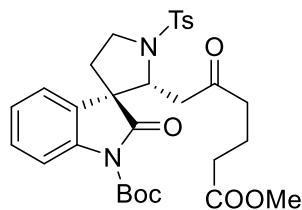

**3s**

***tert*-butyl (2'*R*,3*R*)-2'-(6-methoxy-2,6-dioxohexyl)-2-oxo-1'-tosylspiro[indoline-3,3'-pyrrolidine]-1-carboxylate (3s)**

This compound was prepared according to the general procedure as a yellow liquid in 3 days (47.9 mg, 80% yield for major diastereoisomer in 0.1 mmol scale) and was isolated as a major diastereoisomer (>20:1 dr).

$[\alpha]_D^{20} = -78.6$  ( $c = 0.330$ ,  $\text{CHCl}_3$ ).

Enantiomeric excess was found to be 96% by chiral HPLC (ChiralPak IA column, hexane/*i*-PrOH = 90:10, 254 nm, 1.0 mL/min, first peak:  $t_R = 21.84$  min, second peak:  $t_R = 45.34$  min).

$^1\text{H}$  NMR (500 MHz,  $\text{CDCl}_3$ )  $\delta$  7.84 (dd,  $J = 8.0, 5.2$  Hz, 3H), 7.41 (d,  $J = 8.0$  Hz, 2H), 7.35-7.32 (m, 1H), 7.29 (dd,  $J = 5.2, 2.3$  Hz, 1H), 7.21-7.18 (m, 1H), 4.36 (dd,  $J = 9.6, 4.7$  Hz, 1H), 3.80-3.74 (m, 1H), 3.67-3.62 (m, 4H), 3.35 (dd,  $J = 18.5, 4.7$  Hz, 1H), 2.71 (dd,  $J = 18.5, 9.6$  Hz, 1H), 2.48 (s, 3H), 2.25-2.19 (m, 1H), 2.12-2.06 (m, 1H), 2.03-1.97 (m, 1H), 1.89-1.83 (m, 1H), 1.78-1.73 (m, 2H), 1.65 (s, 9H), 1.55-1.49 (m, 2H).

$^{13}\text{C}$  NMR (126 MHz,  $\text{CDCl}_3$ )  $\delta$  207.02, 175.51, 173.42, 148.99, 144.29, 139.67, 132.87, 130.07, 129.04, 128.01, 124.23, 124.05, 115.77, 84.51, 62.99, 57.09, 51.44, 48.56, 46.63, 40.86, 37.13, 32.65, 28.04, 21.66, 18.24.

HRMS (ESI)  $m/z$  calcd for  $\text{C}_{30}\text{H}_{36}\text{N}_2\text{NaO}_8\text{S}$   $[\text{M}+\text{Na}]^+ = 607.2085$ , found 607.2074.

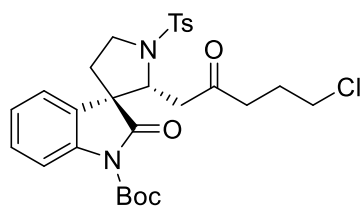

**3t**

***tert*-butyl (2'*R*,3*R*)-2'-(5-chloro-2-oxopentyl)-2-oxo-1'-tosylspiro[indoline-3,3'-pyrrolidine]-1-carboxylate (3t)**

This compound was prepared according to the general procedure as a yellow liquid in 3 days (46.3 mg, 75% yield for major diastereoisomer in 0.1 mmol scale) and was isolated as a major diastereoisomer (>20:1 dr).

$[\alpha]_D^{20} = -65.6$  ( $c = 0.320$ ,  $\text{CHCl}_3$ ).

Enantiomeric excess was found to be 90% by chiral HPLC (ChiralPak IA column, hexane/*i*-PrOH = 95:05, 254 nm, 1.0 mL/min, first peak:  $t_R = 28.77$  min, second peak:  $t_R = 75.42$  min).

$^1\text{H}$  NMR (400 MHz,  $\text{CDCl}_3$ )  $\delta$  7.82 (dd,  $J = 8.4, 2.1$  Hz, 3H), 7.41-7.27 (m, 4H), 7.22-7.18 (m, 1H), 4.35 (dd,  $J = 9.7, 4.8$  Hz, 1H), 3.80-3.73 (m, 1H), 3.67-3.61 (m, 1H),

3.40-3.28 (m, 2H), 3.22-3.16 (m, 1H), 2.73 (dd,  $J = 18.5, 9.7$  Hz, 1H), 2.47 (s, 3H), 2.35-2.28 (m, 1H), 1.88-1.79 (m, 2H), 1.77-1.2 (m, 1H), 1.70-1.62 (m, 11H).

$^{13}\text{C}$  NMR (101 MHz,  $\text{CDCl}_3$ )  $\delta$  206.76, 175.54, 149.00, 144.35, 139.64, 132.85, 130.11, 129.21, 128.01, 127.96, 124.35, 124.08, 115.79, 84.57, 63.04, 57.10, 48.59, 46.77, 43.96, 38.76, 37.12, 28.07, 25.88, 21.69.

HRMS (ESI)  $m/z$  calcd for  $\text{C}_{28}\text{H}_{33}\text{N}_2\text{ClNaO}_6\text{S}$   $[\text{M}+\text{Na}]^+ = 613.1979$ , found 613.1989.

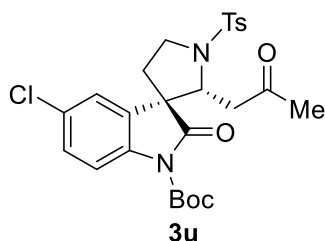

***tert*-butyl (2'*R*,3*R*)-5-chloro-2-oxo-2'-(2-oxopropyl)-1'-tosylspiro[indoline-3,3'-pyrrolidine]-1-carboxylate (3u)**

This compound was prepared according to the general procedure as a yellow liquid in 3 days (41.3 mg, 75% yield for major diastereoisomer in 0.1 mmol scale) and was isolated as a major diastereoisomer (9:1 dr).

$[\alpha]_{\text{D}}^{20} = -60.5$  ( $c = 0.330$ ,  $\text{CHCl}_3$ ).

Enantiomeric excess was found to be 95% by chiral HPLC (ChiralPak IA column, hexane/*i*-PrOH = 90:10, 190 nm, 1.0 mL/min, first peak:  $t_{\text{R}} = 8.83$  min, second peak:  $t_{\text{R}} = 12.77$  min).

$^1\text{H}$  NMR (500 MHz,  $\text{CDCl}_3$ )  $\delta$  7.82 (dd,  $J = 8.4, 6.6$  Hz, 3H), 7.40 (d,  $J = 8.0$  Hz, 2H), 7.31 (dd,  $J = 8.7, 2.2$  Hz, 1H), 7.26-7.23 (m, 1H), 4.30 (td,  $J = 9.4, 5.7$  Hz, 1H), 3.81-3.68 (m, 1H), 3.62 (ddd,  $J = 11.6, 8.4, 3.1$  Hz, 1H), 3.46 (dd,  $J = 18.8, 4.6$  Hz, 1H), 2.69 (dd,  $J = 18.7, 9.5$  Hz, 1H), 2.47 (s, 3H), 1.81 (s, 3H), 1.76 (ddd,  $J = 12.8, 6.1, 3.3$  Hz, 2H), 1.62 (s, 9H).

$^{13}\text{C}$  NMR (126 MHz,  $\text{CDCl}_3$ )  $\delta$  205.64, 174.72, 148.95, 144.39, 138.26, 132.75, 130.10, 129.78, 129.67, 129.05, 128.07, 123.95, 116.93, 84.89, 62.57, 57.15, 48.24, 47.10, 37.05, 29.71, 29.66, 28.06, 21.67.

HRMS (ESI)  $m/z$  calcd for  $\text{C}_{26}\text{H}_{29}\text{ClN}_2\text{NaO}_6\text{S}$   $[\text{M}+\text{Na}]^+ = 555.1327$ , found 555.1333.

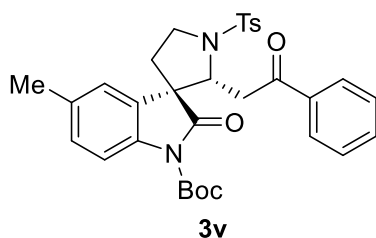

***tert*-butyl (2'*R*,3*R*)-5-methyl-2-oxo-2'-(2-oxo-2-phenylethyl)-1'-tosylspiro[indoline-3,3'-pyrrolidine]-1-carboxylate (3v)**

This compound was prepared according to the general procedure as a yellow liquid in 3 days (42.3 mg, 71% yield for major diastereoisomer in 0.1 mmol scale) and was isolated as a major diastereoisomer (>20:1 dr).



$[\alpha]_D^{20} = -71.7$  ( $c = 0.350$ ,  $\text{CHCl}_3$ ).

Enantiomeric excess was found to be 80% by chiral HPLC (ChiralPak AD-H column, hexane/i-PrOH = 90:10, 254 nm, 1.0 mL/min, first peak:  $t_R = 21.48$  min, second peak:  $t_R = 26.16$  min).

$^1\text{H}$  NMR (400 MHz,  $\text{CDCl}_3$ )  $\delta$  7.86 (d,  $J = 8.2$  Hz, 2H), 7.61-7.56 (m, 3H), 7.47-7.40 (m, 3H), 7.32 (t,  $J = 7.7$  Hz, 2H), 7.03 (s, 1H), 6.90 (d,  $J = 8.3$  Hz, 1H), 4.51 (dd,  $J = 10.2, 4.1$  Hz, 1H), 3.92 (dd,  $J = 18.2, 4.1$  Hz, 1H), 3.86-3.79 (m, 1H), 3.72-3.66 (m, 1H), 3.38 (dd,  $J = 18.2, 10.3$  Hz, 1H), 2.47 (s, 3H), 2.18 (s, 3H), 1.93-1.85 (m, 1H), 1.82-1.76 (m, 1H), 1.64 (s, 9H).  $^{13}\text{C}$  NMR (101 MHz,  $\text{CDCl}_3$ )  $\delta$  197.21, 175.94, 149.20, 144.26, 137.29, 136.15, 133.81, 133.01, 132.90, 130.07, 129.35, 128.26, 128.10, 127.81, 127.61, 124.48, 115.46, 84.14, 63.81, 57.18, 48.56, 42.72, 37.07, 28.12, 21.69, 20.90. HRMS (ESI)  $m/z$  calcd for  $\text{C}_{32}\text{H}_{34}\text{N}_2\text{NaO}_6\text{S}$   $[\text{M}+\text{Na}]^+ = 597.2030$ , found 597.2029.

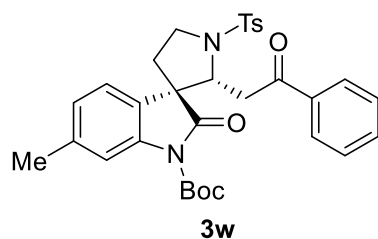

***tert*-butyl (2'*R*,3*R*)-6-methyl-2-oxo-2'-(2-oxo-2-phenylethyl)-1'-tosylspiro[indoline-3,3'-pyrrolidine]-1-carboxylate (3w)**

This compound was prepared according to the general procedure as a yellow liquid in 3 days (42.8 mg, 76% yield for major diastereoisomer in 0.1 mmol scale) and was isolated as a major diastereoisomer (>20:1 dr).

$[\alpha]_D^{20} = -61.3$  ( $c = 0.350$ ,  $\text{CHCl}_3$ ).

Enantiomeric excess was found to be 83% by chiral HPLC (ChiralPak AD-H column, hexane/i-PrOH = 90:10, 254 nm, 1.0 mL/min, first peak:  $t_R = 12.58$  min, second peak:  $t_R = 23.97$  min).

$^1\text{H}$  NMR (500 MHz,  $\text{CDCl}_3$ )  $\delta$  7.86 (d,  $J = 8.2$  Hz, 2H), 7.61-7.57 (m, 3H), 7.45-7.40 (m, 3H), 7.31 (t,  $J = 7.8$  Hz, 2H), 7.12 (d,  $J = 7.7$  Hz, 1H), 6.81 (d,  $J = 7.7$  Hz, 1H), 4.50 (dd,  $J = 10.2, 4.1$  Hz, 1H), 3.93 (dd,  $J = 18.2, 4.1$  Hz, 1H), 3.79 (dd,  $J = 10.9, 5.9$  Hz, 1H), 3.70 (dd,  $J = 8.4, 2.9$  Hz, 1H), 3.33 (dd,  $J = 18.2, 10.2$  Hz, 1H), 2.47 (s, 3H), 2.20 (s, 3H), 1.89-1.83 (m, 1H), 1.76-1.71 (m, 1H), 1.66 (s, 9H).  $^{13}\text{C}$  NMR (126 MHz,  $\text{CDCl}_3$ )  $\delta$  197.41, 176.04, 149.36, 144.27, 139.66, 139.08, 136.09, 132.99, 132.96, 130.09, 128.23, 128.07, 127.69, 124.95, 124.73, 123.59, 116.45, 84.26, 63.93, 57.10, 48.60, 42.69, 37.40, 28.11, 21.76, 21.68. HRMS (ESI)  $m/z$  calcd for  $\text{C}_{32}\text{H}_{34}\text{N}_2\text{NaO}_6\text{S}$   $[\text{M}+\text{Na}]^+ = 597.2030$ , found 597.2016.

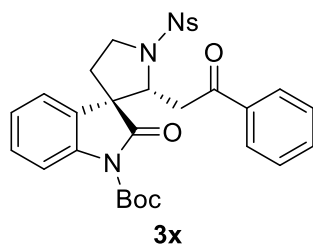

***tert*-butyl (2'*R*,3*R*)-1'-((4-nitrophenyl)sulfonyl)-2-oxo-2'-(2-oxo-2-phenylethyl)spiro[indoline-3,3'-pyrrolidine]-1-carboxylate (3x)**

This compound was prepared according to the general procedure as a yellow liquid in 3 days (48.3 mg, 78% yield for major diastereoisomer in 0.1 mmol scale) and was isolated as a major diastereoisomer (3.5:1 dr).

$[\alpha]_{\text{D}}^{20} = -9.7$  ( $c = 0.360$ ,  $\text{CHCl}_3$ ).

Enantiomeric excess was found to be 87% by chiral HPLC (ChiralPak IA column, hexane/*i*-PrOH = 90:10, 190 nm, 1.0 mL/min, first peak:  $t_{\text{R}} = 23.68$  min, second peak:  $t_{\text{R}} = 63.38$  min).

$^1\text{H}$  NMR (400 MHz,  $\text{CDCl}_3$ )  $\delta$  8.48 (d,  $J = 8.8$  Hz, 2H), 8.18 (d,  $J = 8.8$  Hz, 2H), 7.76 (d,  $J = 8.1$  Hz, 1H), 7.62-7.60(m, 2H), 7.49 (t,  $J = 7.4$  Hz, 1H), 7.34 (t,  $J = 7.7$  Hz, 2H), 7.19-7.13 (m, 2H), 6.95 (dd,  $J = 7.5, 6.8$  Hz, 1H), 4.59 (dd,  $J = 10.1, 4.0$  Hz, 1H), 3.93-3.82 (m, 2H), 3.77-3.71 (m, 1H), 3.46 (dd,  $J = 18.3, 10.1$  Hz, 1H), 1.93 (dd,  $J = 14.9, 7.1$  Hz, 2H), 1.62 (s, 9H).

$^{13}\text{C}$  NMR (101 MHz,  $\text{CDCl}_3$ )  $\delta$  196.83, 175.92, 150.54, 148.98, 141.77, 139.76, 135.92, 133.30, 129.41, 129.18, 128.43, 127.60, 127.17, 124.58, 124.19, 123.57, 115.76, 84.67, 63.70, 56.85, 48.50, 42.90, 36.87, 28.05.

HRMS (ESI)  $m/z$  calcd for  $\text{C}_{30}\text{H}_{29}\text{N}_3\text{NaO}_8\text{S}$   $[\text{M}+\text{Na}]^+ = 614.1568$ , found 614.1572.

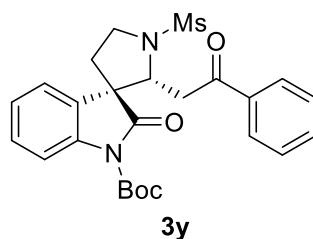

***tert*-butyl (2'*R*,3*R*)-1'-(methylsulfonyl)-2-oxo-2'-(2-oxo-2-phenylethyl)spiro[indoline-3,3'-pyrrolidine]-1-carboxylate (3y)**

This compound was prepared according to the general procedure as a yellow liquid in 3 days (32.6 mg, 65% yield for major diastereoisomer in 0.1 mmol scale) and was isolated as a major diastereoisomer (>20:1 dr).

$[\alpha]_{\text{D}}^{20} = -18.4$  ( $c = 0.300$ ,  $\text{CHCl}_3$ ).

Enantiomeric excess was found to be 92% by chiral HPLC (ChiralPak IA column, hexane/*i*-PrOH = 90:10, 254 nm, 1.0 mL/min, first peak:  $t_{\text{R}} = 15.25$  min, second peak:  $t_{\text{R}} = 17.25$  min).

$^1\text{H}$  NMR (400 MHz,  $\text{CDCl}_3$ )  $\delta$  7.79 (d,  $J = 8.1$  Hz, 1H), 7.58 (d,  $J = 7.3$  Hz, 2H), 7.46 (t,  $J = 7.4$  Hz, 1H), 7.31 (t,  $J = 7.7$  Hz, 2H), 7.18 (t,  $J = 7.2$  Hz, 2H), 6.94 (t,  $J = 7.4$  Hz, 1H), 4.61 (dd,  $J = 9.7, 4.2$  Hz, 1H), 3.85 (dd,  $J = 7.6, 6.4$  Hz, 2H), 3.70 (dd,  $J = 18.5,$

4.2 Hz, 1H), 3.35 (dd,  $J = 18.4, 9.7$  Hz, 1H), 3.07 (s, 3H), 2.50-2.43 (m, 1H), 2.21-2.15 (m, 1H), 1.69 (s, 9H).

$^{13}\text{C}$  NMR (101 MHz,  $\text{CDCl}_3$ )  $\delta$  196.98, 177.07, 149.02, 139.71, 136.13, 133.10, 129.05, 128.35, 127.59, 127.56, 124.31, 123.64, 115.62, 84.80, 63.20, 57.05, 48.30, 42.59, 36.89, 33.90, 28.14.

HRMS (ESI)  $m/z$  calcd for  $\text{C}_{25}\text{H}_{28}\text{N}_2\text{NaO}_6\text{S}$   $[\text{M}+\text{Na}]^+ = 507.1560$ , found 507.1564.

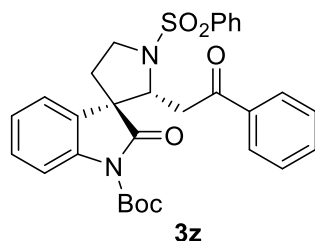

***tert*-butyl (2'*R*,3*R*)-2-oxo-2'-(2-oxo-2-phenylethyl)-1'-(phenylsulfonyl)spiro [indoline-3,3'-pyrrolidine]-1-carboxylate (3z)**

This compound was prepared according to the general procedure as a yellow liquid in 3 days (51.9 mg, 92% yield for major diastereoisomer in 0.1 mmol scale) and was isolated as a major diastereoisomer (>20:1 dr).

$[\alpha]_{\text{D}}^{20} = -71.8$  ( $c = 0.330$ ,  $\text{CHCl}_3$ ).

Enantiomeric excess was found to be 89% by chiral HPLC (ChiralPak AD-H column, hexane/*i*-PrOH = 90:10, 254 nm, 1.0 mL/min, first peak:  $t_{\text{R}} = 14.71$  min, second peak:  $t_{\text{R}} = 24.54$  min).

$^1\text{H}$  NMR (400 MHz,  $\text{CDCl}_3$ )  $\delta$  7.99 (d,  $J = 7.3$  Hz, 2H), 7.73-7.59 (m, 6H), 7.45 (t,  $J = 7.4$  Hz, 1H), 7.31 (t,  $J = 7.6$  Hz, 2H), 7.28-7.22 (m, 1H), 7.13 (t,  $J = 7.9$  Hz, 1H), 7.01 (t,  $J = 7.5$  Hz, 1H), 4.55 (dd,  $J = 10.2, 4.0$  Hz, 1H), 3.95 (dd,  $J = 18.4, 4.0$  Hz, 1H), 3.87-3.80 (m, 1H), 3.77-3.69 (m, 1H), 3.37 (dd,  $J = 18.4, 10.2$  Hz, 1H), 1.91-1.71 (m, 2H), 1.65 (s, 9H).

$^{13}\text{C}$  NMR (101 MHz,  $\text{CDCl}_3$ )  $\delta$  197.27, 175.71, 149.15, 139.69, 136.04, 135.94, 133.46, 133.07, 129.46, 128.91, 128.30, 128.03, 127.86, 127.61, 124.08, 123.81, 115.71, 84.36, 63.83, 57.20, 48.60, 42.76, 37.31, 28.11.

HRMS (ESI)  $m/z$  calcd for  $\text{C}_{30}\text{H}_{30}\text{N}_2\text{NaO}_6\text{S}$   $[\text{M}+\text{Na}]^+ = 569.1717$ , found 569.1720.

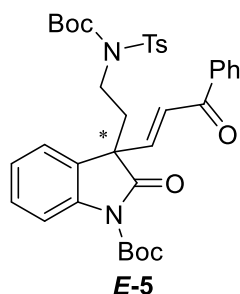

***tert*-butyl (*E*)-3-(2-((*N*-(*tert*-butoxycarbonyl)-4-methylphenyl) sulfonamido) ethyl)-2-oxo-3-(3-oxo-3-phenylprop-1-en-1-yl)indoline-1-carboxylate (5)**

This compound was prepared according to procedure in control experiments as a yellow

solid in 3 days (20.8 mg, 32% yield in 0.1 mmol scale).  $[\alpha]_D^{20} = 0.8$  ( $c = 0.320$ ,  $\text{CHCl}_3$ ).  $^1\text{H}$  NMR (500 MHz,  $\text{CDCl}_3$ )  $\delta$  8.33 (d,  $J = 13.6$  Hz, 1H), 7.99 (dd,  $J = 7.3$ , 1.2 Hz, 1H), 7.89-7.87 (m, 2H), 7.75 (d,  $J = 8.4$  Hz, 2H), 7.55-7.53 (m, 2H), 7.45 (t,  $J = 7.6$  Hz, 2H), 7.29 (dd,  $J = 10.8$ , 4.8 Hz, 4H), 6.35 (d,  $J = 13.6$  Hz, 1H), 3.69 (dd,  $J = 9.5$ , 6.8 Hz, 2H), 3.05-3.02 (m, 2H), 2.40 (s, 3H), 1.66 (s, 9H), 1.50 (s, 9H).  $^{13}\text{C}$  NMR (126 MHz,  $\text{CDCl}_3$ )  $\delta$  189.34, 150.63, 148.75, 145.01, 142.78, 139.27, 138.51, 135.11, 132.37, 132.04, 130.23, 128.56, 128.18, 127.33, 126.51, 124.48, 123.23, 118.28, 115.60, 104.37, 102.33, 85.31, 84.59, 45.51, 28.21, 27.55, 21.63, 20.95. HRMS (ESI)  $m/z$  calcd for  $\text{C}_{36}\text{H}_{40}\text{N}_2\text{NaO}_8\text{S}$   $[\text{M}+\text{Na}]^+ = 683.2398$ , found 683.2385.

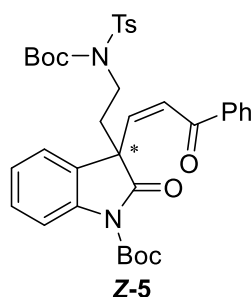

***tert*-butyl (*Z*)-3-(2-((*N*-(*tert*-butoxycarbonyl)-4-methylphenyl) sulfonamido) ethyl)-2-oxo-3-(3-oxo-3-phenylprop-1-en-1-yl)indoline-1-carboxylate (**6**)**

This compound was prepared according to procedure in control experiments as a yellow solid in 3 days (15.3 mg, 23% yield in 0.1 mmol scale).  $[\alpha]_D^{20} = 0.6$  ( $c = 0.400$ ,  $\text{CHCl}_3$ ).  $^1\text{H}$  NMR (500 MHz,  $\text{CDCl}_3$ )  $\delta$  8.33 (d,  $J = 13.6$  Hz, 1H), 7.99 (dd,  $J = 7.3$ , 1.2 Hz, 1H), 7.89-7.87 (m, 2H), 7.75 (d,  $J = 8.4$  Hz, 2H), 7.55-7.53 (m, 2H), 7.45 (t,  $J = 7.6$  Hz, 2H), 7.29 (dd,  $J = 10.8$ , 4.8 Hz, 4H), 6.35 (d,  $J = 13.6$  Hz, 1H), 3.69 (dd,  $J = 9.5$ , 6.8 Hz, 2H), 3.05-3.02 (m, 2H), 2.40 (s, 3H), 1.66 (s, 9H), 1.50 (s, 9H).  $^{13}\text{C}$  NMR (126 MHz,  $\text{CDCl}_3$ )  $\delta$  189.34, 150.63, 148.75, 145.01, 142.78, 139.27, 138.51, 135.11, 132.37, 132.04, 130.23, 128.56, 128.18, 127.33, 126.51, 124.48, 123.23, 118.28, 115.60, 104.37, 102.33, 85.31, 84.59, 45.51, 28.21, 27.55, 21.63, 20.95. HRMS (ESI)  $m/z$  calcd for  $\text{C}_{36}\text{H}_{40}\text{N}_2\text{NaO}_8\text{S}$   $[\text{M}+\text{Na}]^+ = 683.2398$ , found 683.2387.

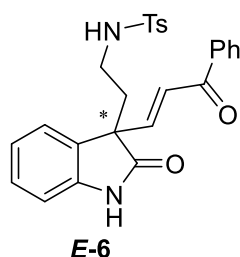

**(*E*)-4-methyl-*N*-(2-(2-oxo-3-(3-oxo-3-phenylprop-1-en-1-yl)indolin-3-yl)ethyl)benzenesulfonamide (*E*-int.)**

This compound was prepared according to procedure in control experiments as a yellow solid in 3 days (40 mg, 87% yield in 0.1 mmol scale).  $^1\text{H}$  NMR (400 MHz,  $\text{CDCl}_3$ )  $\delta$  8.29 (s, 1H), 7.86 (dd,  $J = 23.7$ , 7.7 Hz, 4H), 7.35-7.51 (m, 5H), 7.00 (t,  $J = 7.7$  Hz, 1H), 6.53 (d,  $J = 7.7$  Hz, 1H), 6.46 (t,  $J = 7.6$  Hz, 1H), 5.51

(d,  $J = 7.5$  Hz, 1H), 4.38 (dd,  $J = 10.7, 2.8$  Hz, 1H), 3.92-3.97 (m, 1H), 3.77 (dd,  $J = 18.3, 2.9$  Hz, 1H), 3.48-3.42 (m, 1H), 2.54 (s, 3H), 4.18-4.10 (m, 1H), 2.51-2.43 (m, 1H), 1.80-1.75 (m, 1H).

$^{13}\text{C}$  NMR (101 MHz,  $\text{CDCl}_3$ )  $\delta$  198.94, 177.87, 144.17, 139.53, 136.62, 133.80, 133.35, 133.06, 130.17, 128.53, 128.08, 127.95, 122.12, 122.05, 109.91, 63.46, 55.04, 47.32, 42.69, 35.38, 21.65.

HRMS (ESI)  $m/z$  calcd for  $\text{C}_{26}\text{H}_{24}\text{N}_2\text{NaO}_4\text{S}$   $[\text{M}+\text{Na}]^+ = 483.1349$ , found 483.1346.

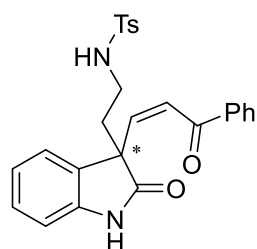

**Z-6**

**(Z)-4-methyl-N-(2-(2-oxo-3-(3-oxo-3-phenylprop-1-en-1-yl)indolin-3-yl)ethyl)benzenesulfonamide (E-int.)**

This compound was prepared according to procedure in control experiments as a yellow solid in 3 days (42 mg, 91% yield in 0.1 mmol scale).

$^1\text{H}$  NMR (500 MHz, DMSO)  $\delta$  10.34 (s, 1H), 7.82 (d,  $J = 8.1$  Hz, 2H), 7.61 (d,  $J = 7.5$  Hz, 2H), 7.56-7.50 (m, 3H), 7.40 (t,  $J = 8.0$  Hz, 3H), 7.00 (t,  $J = 7.6$  Hz, 1H), 6.75-6.72 (m, 1H), 6.65 (d,  $J = 7.7$  Hz, 1H), 4.37 (dd,  $J = 9.6, 4.1$  Hz, 1H), 3.75-3.68 (m, 2H), 3.61 (dd,  $J = 18.2, 9.7$  Hz, 1H), 3.52 (dd,  $J = 18.2, 4.1$  Hz, 1H), 2.45 (d,  $J = 8.3$  Hz, 3H), 1.85-1.80 (m, 1H), 1.68-1.63 (m, 1H).

$^{13}\text{C}$  NMR (126 MHz, DMSO)  $\delta$  197.36, 178.73, 144.17, 142.44, 136.42, 133.88, 133.55, 130.36, 129.66, 128.93, 128.77, 128.33, 127.81, 125.20, 121.57, 109.96, 62.23, 56.90, 48.50, 43.11, 36.48, 21.59.

HRMS (ESI)  $m/z$  calcd for  $\text{C}_{26}\text{H}_{24}\text{N}_2\text{NaO}_4\text{S}$   $[\text{M}+\text{Na}]^+ = 483.1349$ , found 483.1349.

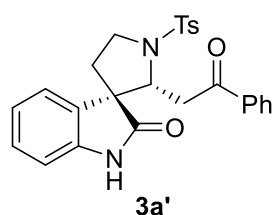

**3a'**

**(2'R,3R)-2'-(2-oxo-2-phenylethyl)-1'-tosylspiro[indoline-3,3'-pyrrolidin]-2-one (3a')**

This compound was prepared according to the procedure in control experiments as a yellow solid in 3 days. (32.6 mg, 65% yield for major diastereoisomer in 0.1 mmol scale) and was isolated as a major diastereoisomer (>20:1 dr).

$[\alpha]_{\text{D}}^{20} = -94.998$  ( $c = 0.330$ ,  $\text{CHCl}_3$ ).

Enantiomeric excess was found to be 93% by chiral HPLC (ChiralPak AD-H column,

hexane/i-PrOH = 70:30, 214 nm, 1.0 mL/min, first peak:  $t_R$  = 36.31 min, second peak:  $t_R$  = 69.95 min).

$^1\text{H}$  NMR (500 MHz, DMSO)  $\delta$  10.35 (s, 1H), 7.82 (d,  $J$  = 8.1 Hz, 2H), 7.61 (d,  $J$  = 7.5 Hz, 2H), 7.55- 7.50 (m, 3H), 7.39 (t,  $J$  = 7.9 Hz, 3H), 7.00 (t,  $J$  = 7.6 Hz, 1H), 6.74 (t,  $J$  = 7.5 Hz, 1H), 6.66 (d,  $J$  = 7.7 Hz, 1H), 4.39 (dd,  $J$  = 9.5, 4.2 Hz, 1H), 3.76-3.67 (m, 2H), 3.64-3.51 (m, 2H), 2.45 (s, 3H), 1.85-1.80 (m, 1H), 1.69-1.63 (m, 1H).

$^{13}\text{C}$  NMR (126 MHz, DMSO)  $\delta$  197.36, 178.74, 144.17, 142.45, 136.42, 133.88, 133.54, 130.36, 129.66, 128.92, 128.78, 128.34, 127.81, 125.19, 121.58, 109.97, 62.24, 56.91, 48.51, 43.11, 36.48, 21.58.

HRMS (ESI)  $m/z$  calcd for  $\text{C}_{26}\text{H}_{24}\text{N}_2\text{NaO}_4\text{S}$   $[\text{M}+\text{Na}]^+ = 483.1349$ , found 483.1349.

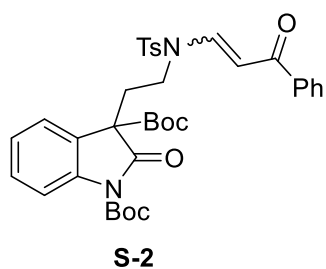

**di-tert-butyl 3-(2-((4-methyl-N-(3-oxo-3-phenylprop-1-en-1-yl)phenyl)sulfonamid o)ethyl)-2-oxoindoline-1,3-dicarboxylate (S-2)**

This compound was prepared according to procedure in control experiments as a yellow solid in 3 days (160 mg, 83% yield in 0.3 mmol scale).

$^1\text{H}$  NMR (500 MHz,  $\text{CDCl}_3$ )  $\delta$  8.32 (d,  $J$  = 13.6 Hz, 1H), 8.08 (d,  $J$  = 7.6 Hz, 2H), 7.87 (d,  $J$  = 8.2 Hz, 1H), 7.68 (d,  $J$  = 7.9 Hz, 2H), 7.54 (t,  $J$  = 7.2 Hz, 1H), 7.47 (t,  $J$  = 7.4 Hz, 2H), 7.40 (t,  $J$  = 7.8 Hz, 1H), 7.29 (dd,  $J$  = 16.4, 7.2 Hz, 3H), 7.22 (t,  $J$  = 7.4 Hz, 1H), 6.62 (d,  $J$  = 13.6 Hz, 1H), 3.76 (td,  $J$  = 14.5, 4.6 Hz, 1H), 3.48-3.42 (m, 1H), 2.70 (td,  $J$  = 13.2, 3.5 Hz, 1H), 2.41 (s, 3H), 2.29 (td,  $J$  = 13.2, 4.7 Hz, 1H), 1.66 (s, 9H), 1.36 (s, 9H).

$^{13}\text{C}$  NMR (126 MHz,  $\text{CDCl}_3$ )  $\delta$  188.86, 172.17, 166.88, 148.77, 145.02, 142.02, 139.90, 138.35, 134.97, 132.47, 130.23, 129.69, 128.48, 128.39, 127.32, 126.30, 124.97, 122.66, 115.51, 102.27, 84.84, 83.79, 77.41, 77.16, 76.90, 58.72, 41.99, 30.87, 28.10, 27.59, 21.61.

HRMS (ESI)  $m/z$  calcd for  $\text{C}_{36}\text{H}_{40}\text{N}_2\text{NaO}_8\text{S}$   $[\text{M}+\text{Na}]^+ = 683.2398$ , found 683.2383.

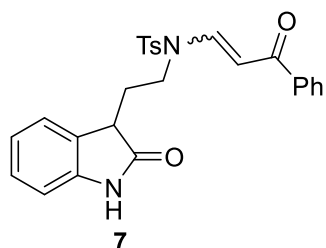

**4-methyl-N-(3-oxo-3-phenylprop-1-en-1-yl)-N-(2-(2-oxoindolin-3-yl)ethyl)benzen sulfonamide (6)**

This compound was prepared according to procedure in control experiments as a yellow solid in 3 days (84 mg, 90% yield in 0.2 mmol scale).

$^1\text{H}$  NMR (400 MHz,  $\text{CDCl}_3$ )  $\delta$  8.78 (s, 1H), 8.30 (d,  $J = 13.6$  Hz, 1H), 7.96 (d,  $J = 7.2$  Hz, 2H), 7.69 (d,  $J = 8.3$  Hz, 2H), 7.47-7.39 (m, 4H), 7.30 (d,  $J = 8.3$  Hz, 3H), 7.23 (d,  $J = 8.9$  Hz, 1H), 6.87 (t,  $J = 6.2$  Hz, 1H), 6.49 (d,  $J = 13.6$  Hz, 1H), 3.95-3.78 (m, 1H), 3.62-3.57 (m, 2H), 2.40 (s, 3H), 2.26-2.14 (m, 1H), 1.90-1.76 (m, 1H).

$^{13}\text{C}$  NMR (101 MHz,  $\text{CDCl}_3$ )  $\delta$  197.68, 189.14, 145.01, 142.41, 138.40, 135.14, 132.44, 130.23, 128.49, 128.25, 127.59, 127.32, 123.93, 122.81, 110.10, 102.46, 77.38, 77.07, 76.75, 62.57, 43.01, 36.42, 27.29.

HRMS (ESI)  $m/z$  calcd for  $\text{C}_{26}\text{H}_{24}\text{N}_2\text{NaO}_4\text{S}$   $[\text{M}+\text{Na}]^+ = 483.1349$ , found 483.1345.

## 9. HPLC Spectra

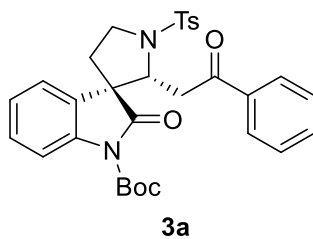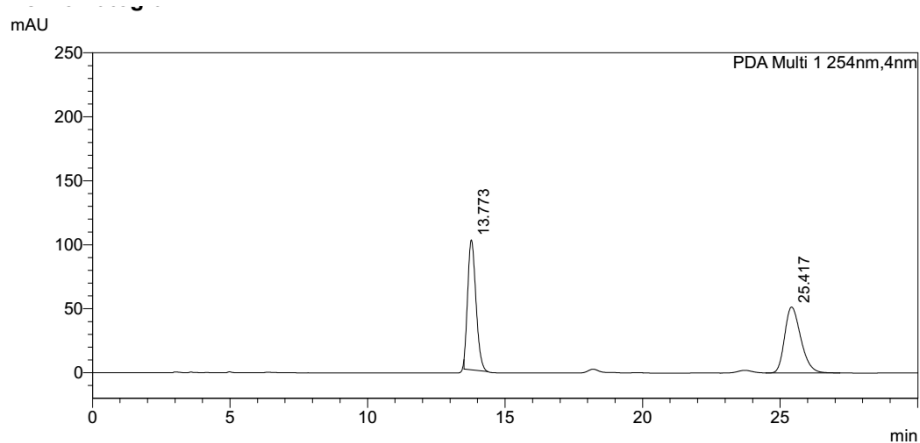

### <Peak Table>

| Peak# | Ret. Time | Height | Height% | Area    | Area%   |
|-------|-----------|--------|---------|---------|---------|
| 1     | 13.773    | 101479 | 66.321  | 2127919 | 50.308  |
| 2     | 25.417    | 51534  | 33.679  | 2101841 | 49.692  |
| Total |           | 153013 | 100.000 | 4229760 | 100.000 |

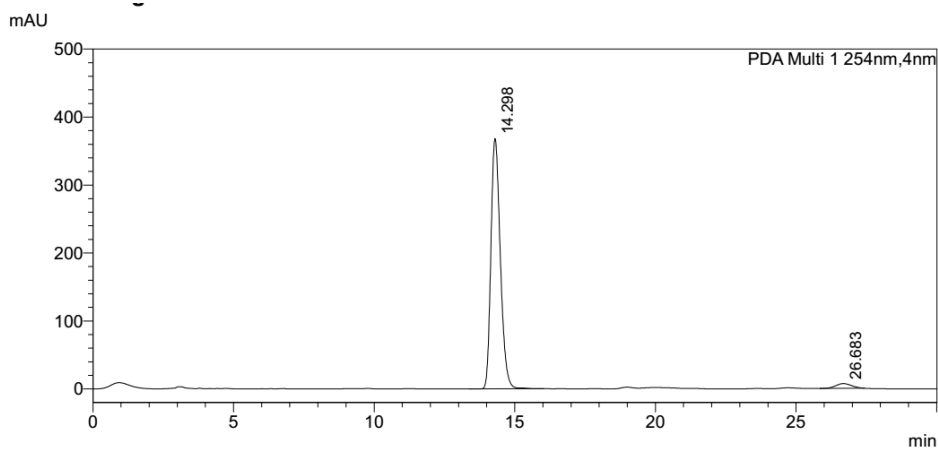

### <Peak Table>

| Peak# | Ret. Time | Height | Height% | Area    | Area%   |
|-------|-----------|--------|---------|---------|---------|
| 1     | 14.298    | 368319 | 98.156  | 8580777 | 96.934  |
| 2     | 26.683    | 6921   | 1.844   | 271444  | 3.066   |
| Total |           | 375240 | 100.000 | 8852221 | 100.000 |



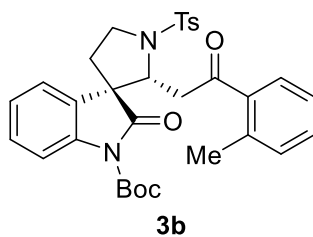

### <Chromatogram>

mAU

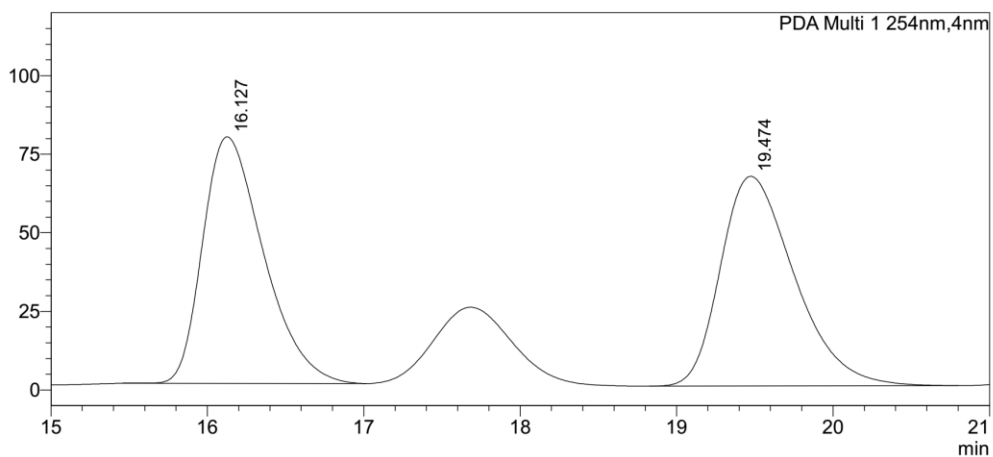

### <Peak Table>

PDA Ch1 254nm

| Peak# | Ret. Time | Height | Height% | Area    | Area%   |
|-------|-----------|--------|---------|---------|---------|
| 1     | 16.127    | 78439  | 54.036  | 2122555 | 49.171  |
| 2     | 19.474    | 66721  | 45.964  | 2194155 | 50.829  |
| Total |           | 145161 | 100.000 | 4316710 | 100.000 |

mAU

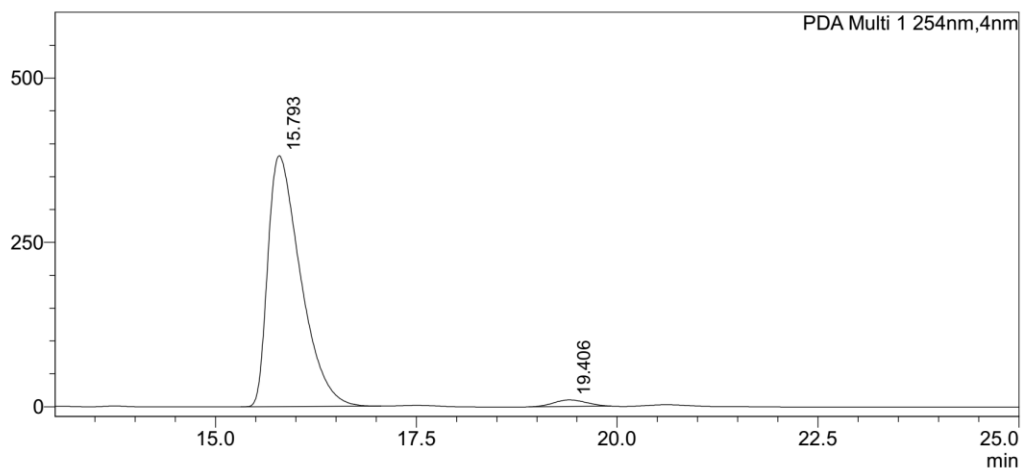

### <Peak Table>

PDA Ch1 254nm

| Peak# | Ret. Time | Height | Height% | Area     | Area%   |
|-------|-----------|--------|---------|----------|---------|
| 1     | 15.793    | 381753 | 97.465  | 10837347 | 97.454  |
| 2     | 19.406    | 9928   | 2.535   | 283163   | 2.546   |
| Total |           | 391680 | 100.000 | 11120510 | 100.000 |

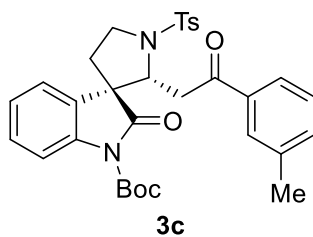

### <Chromatogram>

mAU

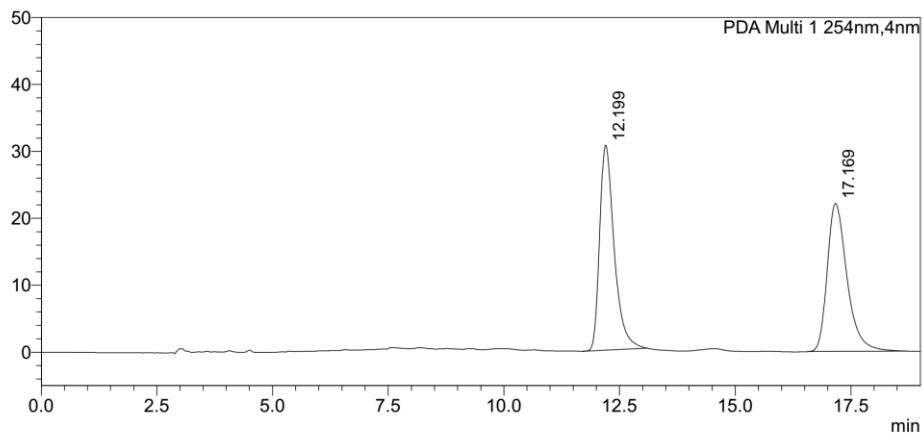

### <Peak Table>

PDA Ch1 254nm

| Peak# | Ret. Time | Height | Height% | Area    | Area%   |
|-------|-----------|--------|---------|---------|---------|
| 1     | 12.199    | 30627  | 58.068  | 671379  | 50.424  |
| 2     | 17.169    | 22117  | 41.932  | 660086  | 49.576  |
| Total |           | 52744  | 100.000 | 1331466 | 100.000 |

mAU

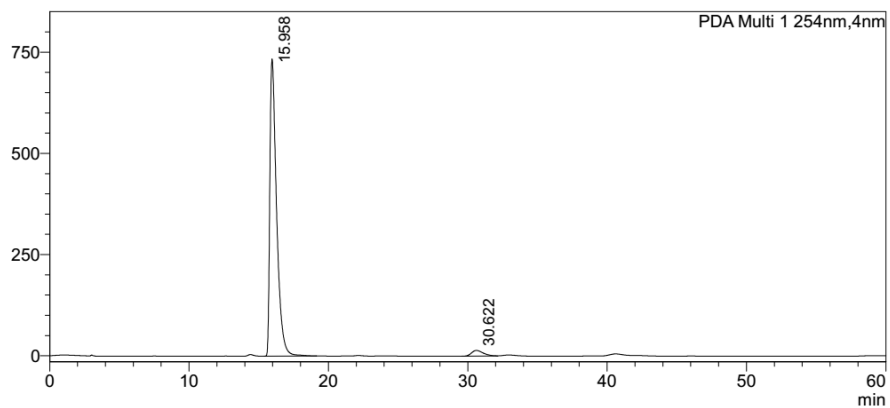

### <Peak Table>

PDA Ch1 254nm

| Peak# | Ret. Time | Height | Height% | Area     | Area%   |
|-------|-----------|--------|---------|----------|---------|
| 1     | 15.958    | 734489 | 98.139  | 24683571 | 96.840  |
| 2     | 30.622    | 13925  | 1.861   | 805499   | 3.160   |
| Total |           | 748414 | 100.000 | 25489070 | 100.000 |

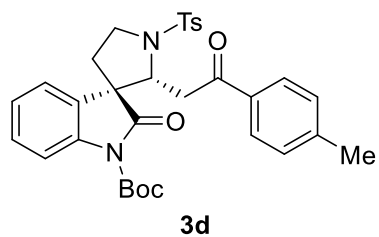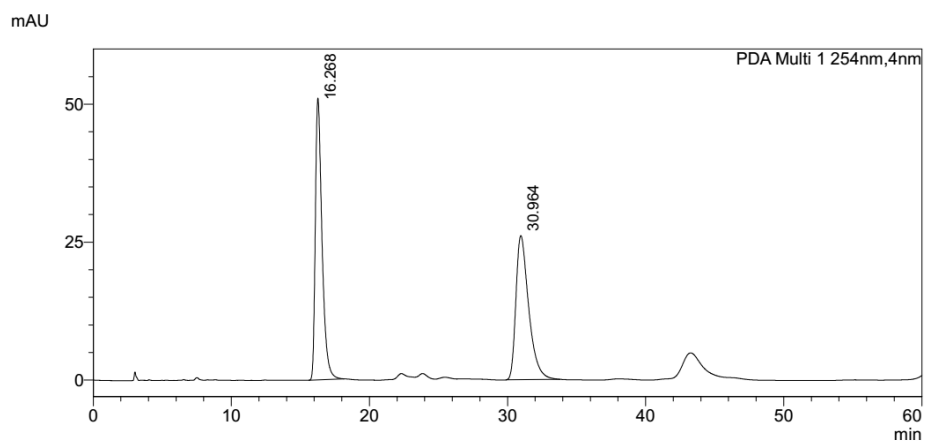

**<Peak Table>**

| PDA Ch1 254nm |           |        |         |         |         |
|---------------|-----------|--------|---------|---------|---------|
| Peak#         | Ret. Time | Height | Height% | Area    | Area%   |
| 1             | 16.268    | 51081  | 66.160  | 1724807 | 50.676  |
| 2             | 30.964    | 26128  | 33.840  | 1678791 | 49.324  |
| Total         |           | 77209  | 100.000 | 3403597 | 100.000 |

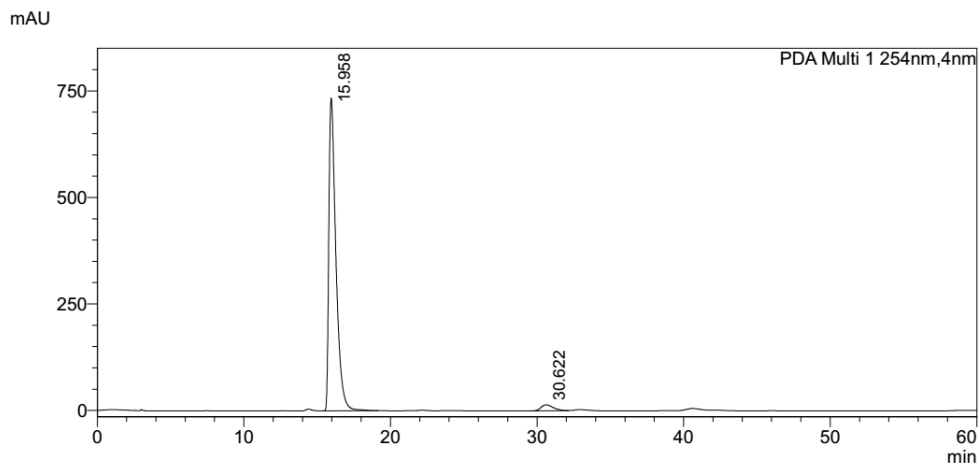

**<Peak Table>**

| PDA Ch1 254nm |           |        |         |          |         |
|---------------|-----------|--------|---------|----------|---------|
| Peak#         | Ret. Time | Height | Height% | Area     | Area%   |
| 1             | 15.958    | 734489 | 98.139  | 24683571 | 96.840  |
| 2             | 30.622    | 13925  | 1.861   | 805499   | 3.160   |
| Total         |           | 748414 | 100.000 | 25489070 | 100.000 |

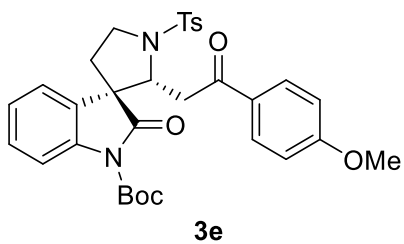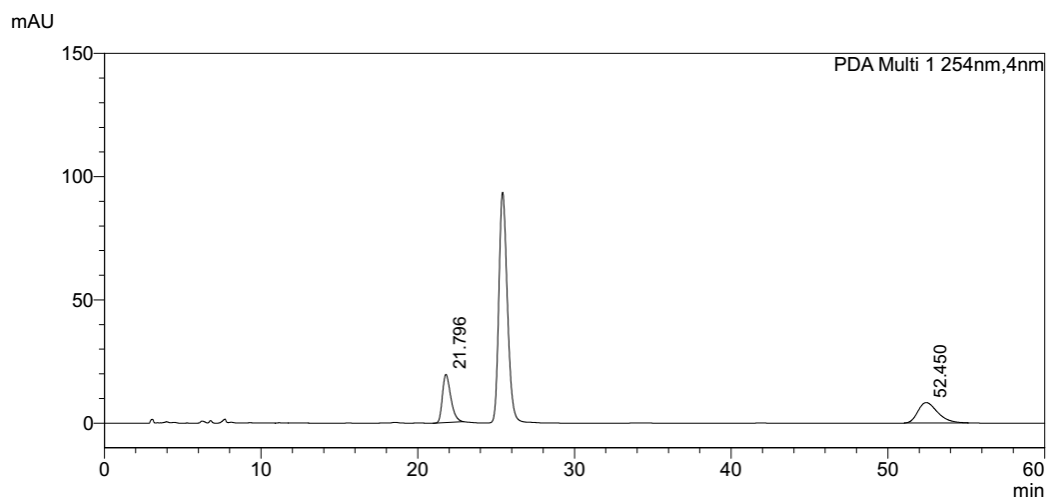

**<Peak Table>**

PDA Ch1 254nm

| Peak# | Ret. Time | Height | Height% | Area    | Area%   |
|-------|-----------|--------|---------|---------|---------|
| 1     | 21.796    | 19508  | 70.167  | 722406  | 49.838  |
| 2     | 52.450    | 8294   | 29.833  | 727101  | 50.162  |
| Total |           | 27803  | 100.000 | 1449507 | 100.000 |

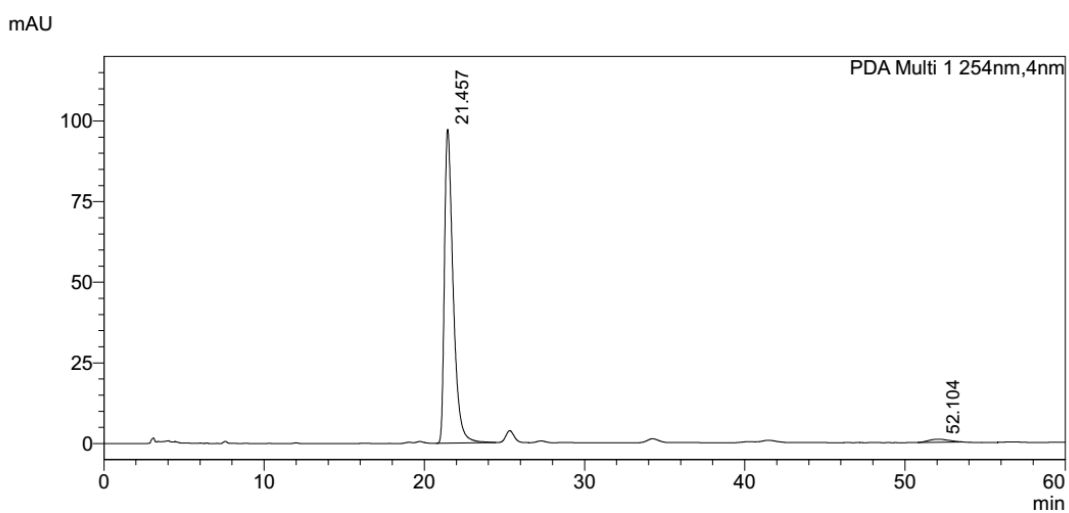

**<Peak Table>**

PDA Ch1 254nm

| Peak# | Ret. Time | Height | Height% | Area    | Area%   |
|-------|-----------|--------|---------|---------|---------|
| 1     | 21.457    | 97397  | 99.050  | 3685892 | 97.806  |
| 2     | 52.104    | 934    | 0.950   | 82696   | 2.194   |
| Total |           | 98331  | 100.000 | 3768588 | 100.000 |

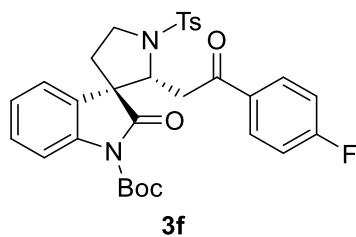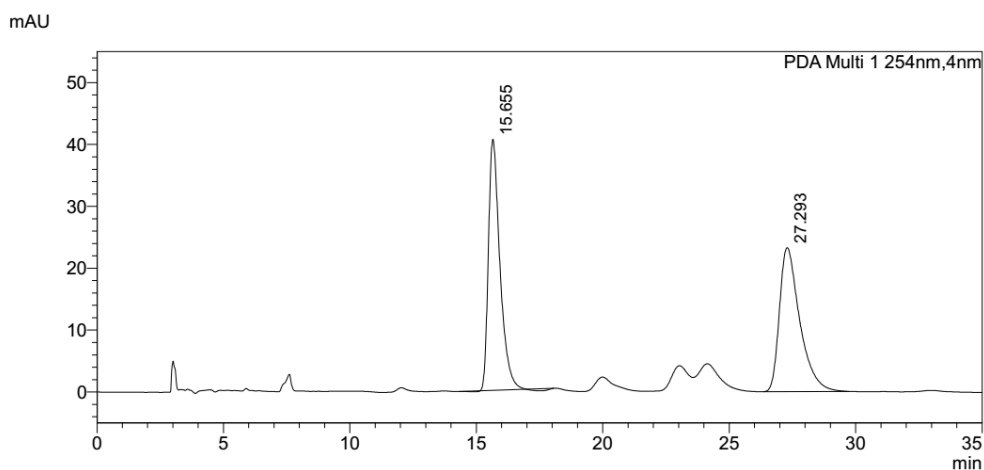

**<Peak Table>**

PDA Ch1 254nm

| Peak# | Ret. Time | Height | Height% | Area    | Area%   |
|-------|-----------|--------|---------|---------|---------|
| 1     | 15.655    | 40576  | 63.558  | 1269567 | 49.418  |
| 2     | 27.293    | 23265  | 36.442  | 1299473 | 50.582  |
| Total |           | 63841  | 100.000 | 2569039 | 100.000 |

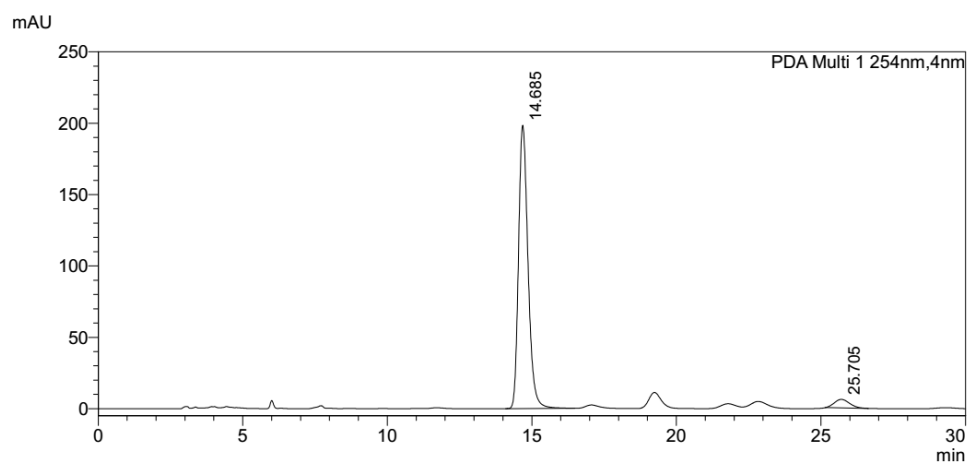

**<Peak Table>**

PDA Ch1 254nm

| Peak# | Ret. Time | Height | Height% | Area    | Area%   |
|-------|-----------|--------|---------|---------|---------|
| 1     | 14.685    | 198576 | 97.085  | 4527116 | 95.381  |
| 2     | 25.705    | 5963   | 2.915   | 219227  | 4.619   |
| Total |           | 204539 | 100.000 | 4746342 | 100.000 |

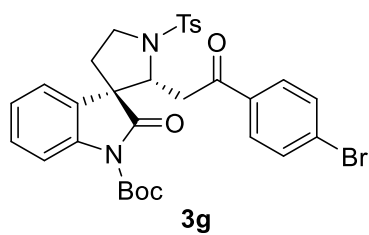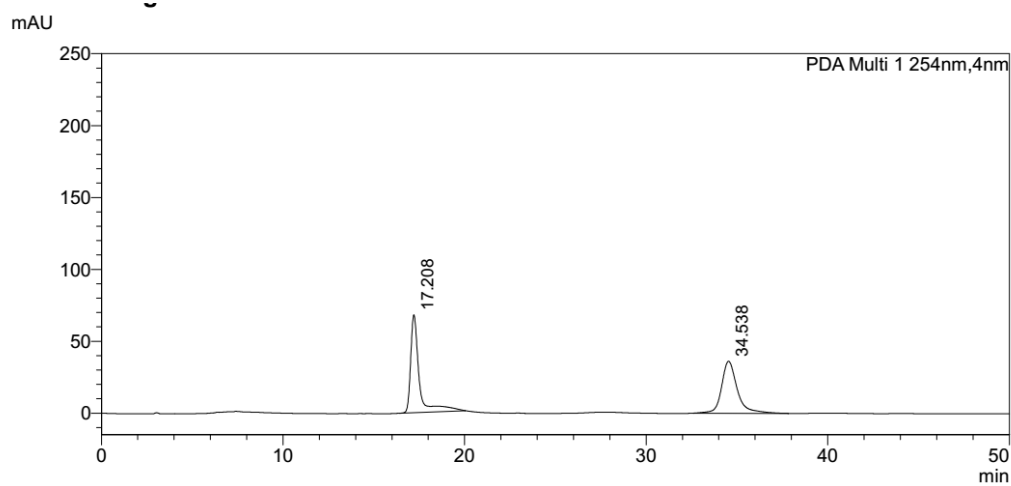

**<Peak Table>**

PDA Ch1 254nm

| Peak# | Ret. Time | Height | Height% | Area    | Area%   |
|-------|-----------|--------|---------|---------|---------|
| 1     | 17.208    | 68071  | 65.302  | 2240970 | 50.850  |
| 2     | 34.538    | 36169  | 34.698  | 2166059 | 49.150  |
| Total |           | 104241 | 100.000 | 4407028 | 100.000 |

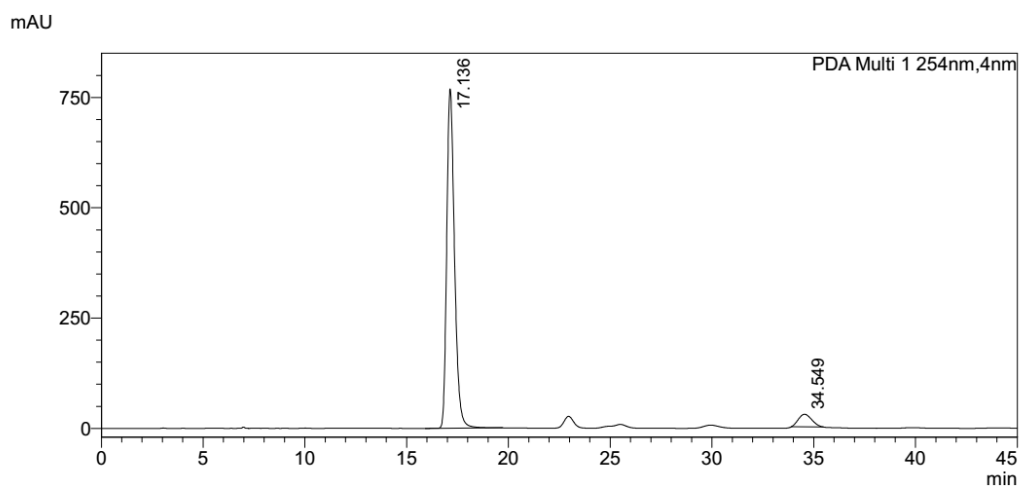

**<Peak Table>**

PDA Ch1 254nm

| Peak# | Ret. Time | Height | Height% | Area     | Area%   |
|-------|-----------|--------|---------|----------|---------|
| 1     | 17.136    | 768853 | 96.428  | 20406215 | 94.016  |
| 2     | 34.549    | 28484  | 3.572   | 1298914  | 5.984   |
| Total |           | 797337 | 100.000 | 21705129 | 100.000 |

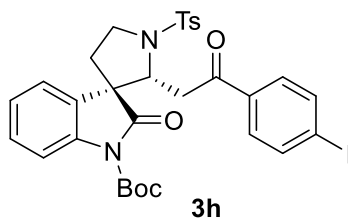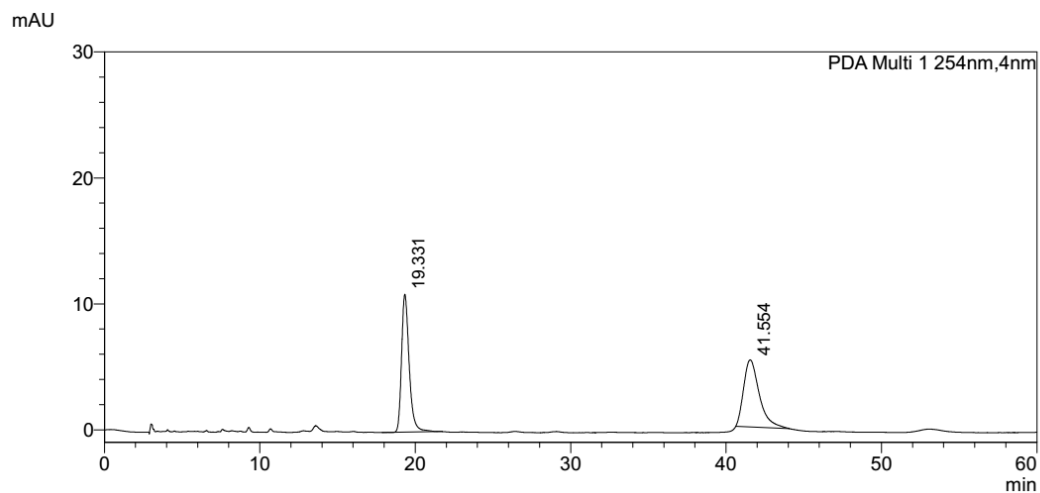

**<Peak Table>**

PDA Ch1 254nm

| Peak# | Ret. Time | Height | Height% | Area   | Area%   |
|-------|-----------|--------|---------|--------|---------|
| 1     | 19.331    | 10948  | 67.308  | 373083 | 50.078  |
| 2     | 41.554    | 5317   | 32.692  | 371923 | 49.922  |
| Total |           | 16265  | 100.000 | 745006 | 100.000 |

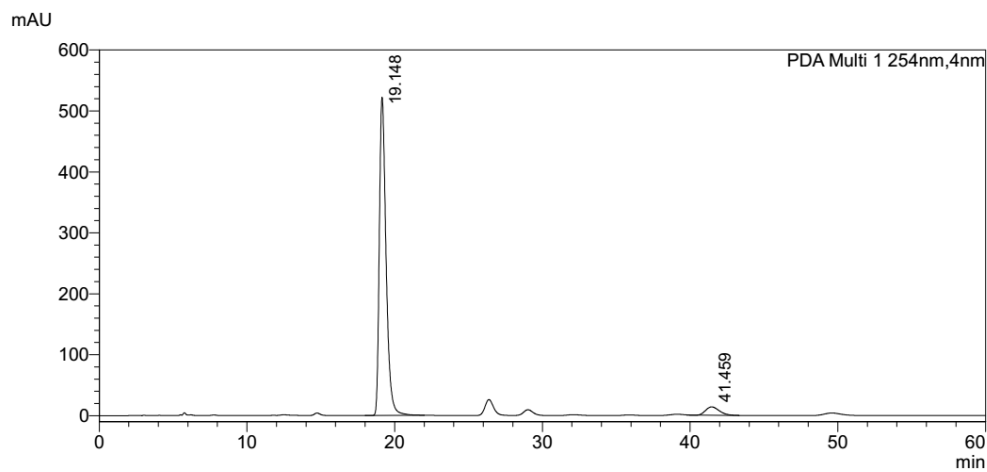

**<Peak Table>**

PDA Ch1 254nm

| Peak# | Ret. Time | Height | Height% | Area     | Area%   |
|-------|-----------|--------|---------|----------|---------|
| 1     | 19.148    | 522131 | 97.460  | 16555430 | 95.104  |
| 2     | 41.459    | 13608  | 2.540   | 852355   | 4.896   |
| Total |           | 535739 | 100.000 | 17407785 | 100.000 |

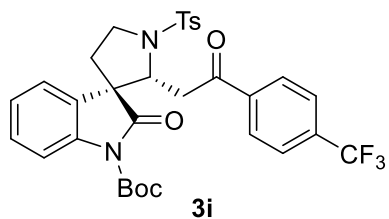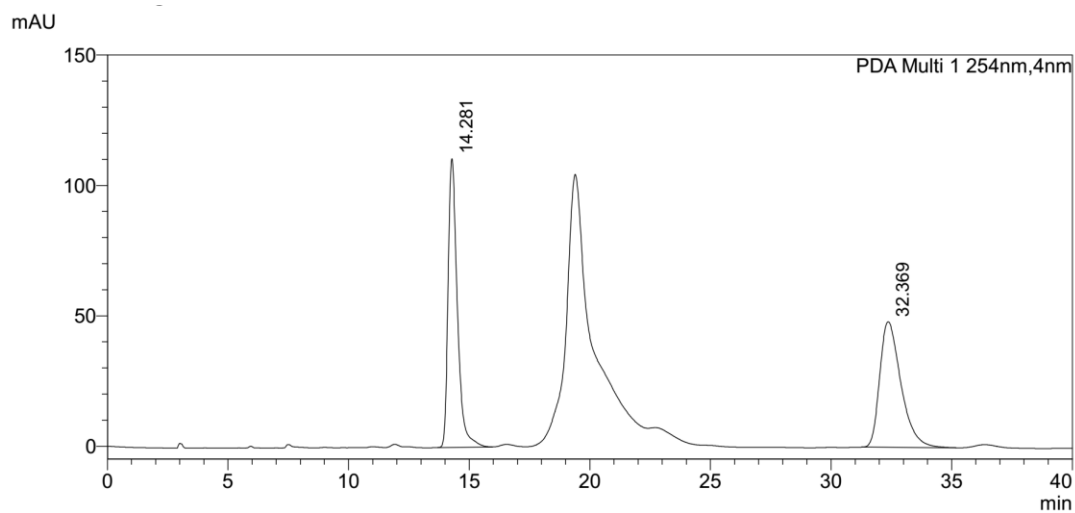

#### <Peak Table>

PDA Ch1 254nm

| Peak# | Ret. Time | Height | Height% | Area    | Area%   |
|-------|-----------|--------|---------|---------|---------|
| 1     | 14.281    | 110738 | 69.687  | 2958905 | 50.151  |
| 2     | 32.369    | 48170  | 30.313  | 2941085 | 49.849  |
| Total |           | 158908 | 100.000 | 5899989 | 100.000 |

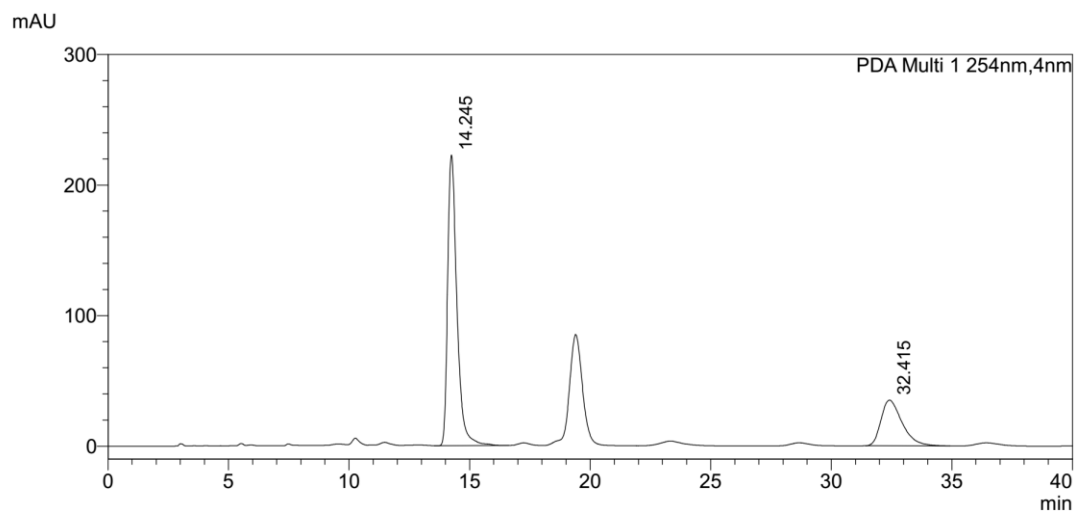

#### <Peak Table>

PDA Ch1 254nm

| Peak# | Ret. Time | Height | Height% | Area    | Area%   |
|-------|-----------|--------|---------|---------|---------|
| 1     | 14.245    | 222640 | 86.424  | 5966224 | 73.691  |
| 2     | 32.415    | 34975  | 13.576  | 2130065 | 26.309  |
| Total |           | 257615 | 100.000 | 8096289 | 100.000 |



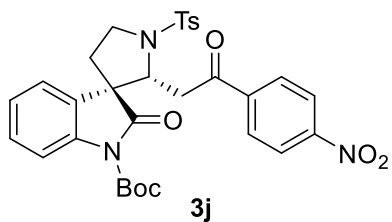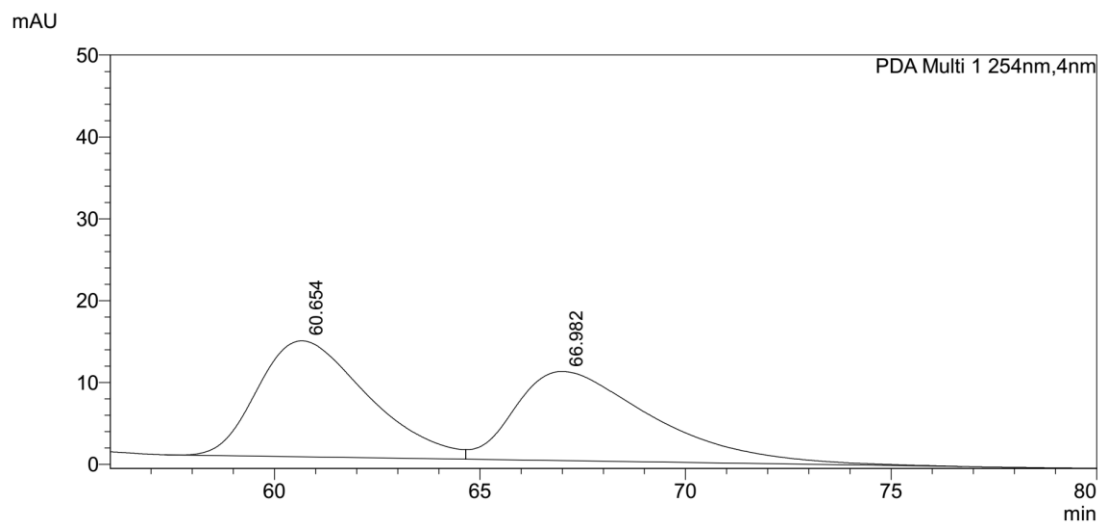

**<Peak Table>**

PDA Ch1 254nm

| Peak# | Ret. Time | Height | Height% | Area    | Area%   |
|-------|-----------|--------|---------|---------|---------|
| 1     | 60.654    | 14170  | 56.565  | 2645173 | 50.999  |
| 2     | 66.982    | 10881  | 43.435  | 2541539 | 49.001  |
| Total |           | 25051  | 100.000 | 5186713 | 100.000 |

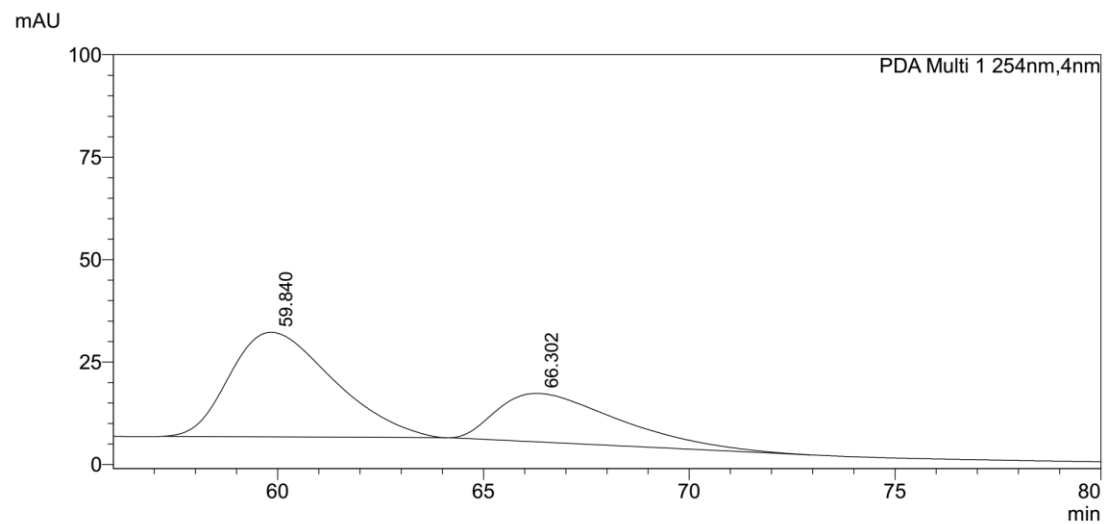

**<Peak Table>**

PDA Ch1 254nm

| Peak# | Ret. Time | Height | Height% | Area    | Area%   |
|-------|-----------|--------|---------|---------|---------|
| 1     | 59.840    | 25504  | 68.300  | 4472440 | 64.390  |
| 2     | 66.302    | 11837  | 31.700  | 2473449 | 35.610  |
| Total |           | 37341  | 100.000 | 6945889 | 100.000 |

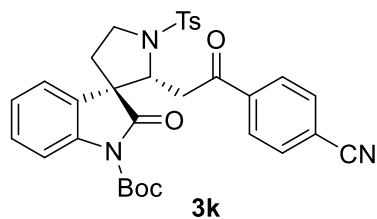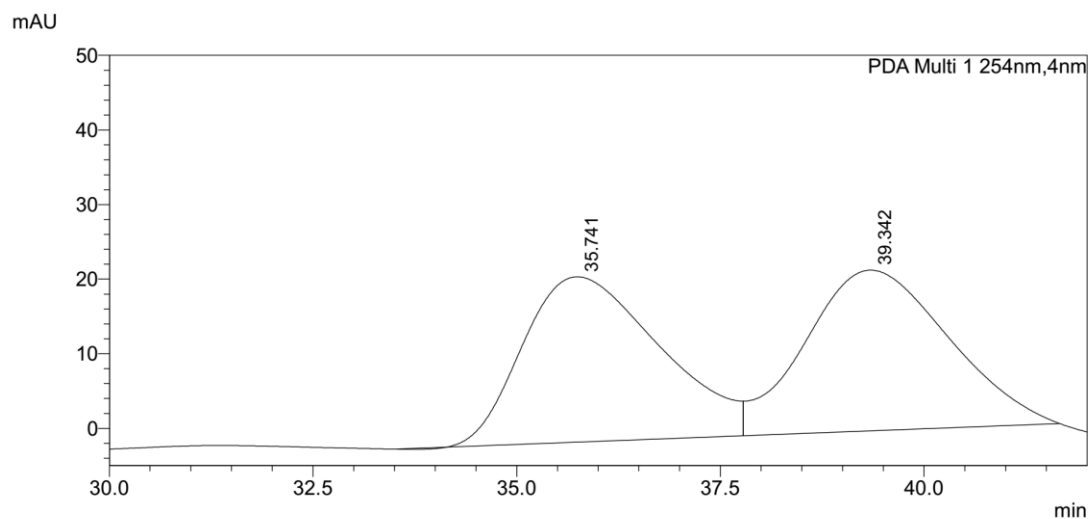

**<Peak Table>**

PDA Ch1 254nm

| Peak# | Ret. Time | Height | Height% | Area    | Area%   |
|-------|-----------|--------|---------|---------|---------|
| 1     | 35.741    | 22169  | 50.714  | 2597438 | 49.646  |
| 2     | 39.342    | 21545  | 49.286  | 2634433 | 50.354  |
| Total |           | 43714  | 100.000 | 5231871 | 100.000 |

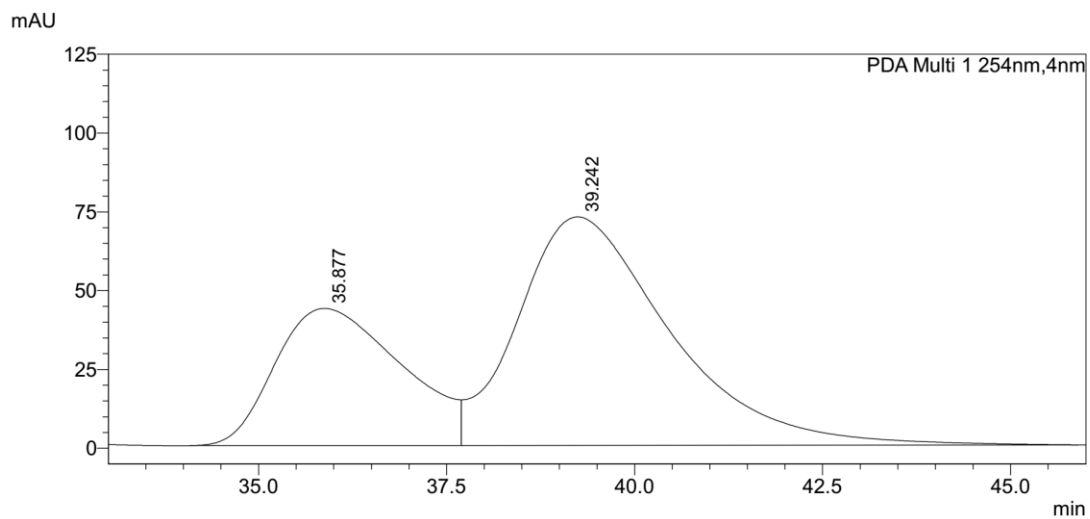

**<Peak Table>**

PDA Ch1 254nm

| Peak# | Ret. Time | Height | Height% | Area     | Area%   |
|-------|-----------|--------|---------|----------|---------|
| 1     | 35.877    | 43518  | 37.518  | 5092222  | 33.298  |
| 2     | 39.242    | 72473  | 62.482  | 10200811 | 66.702  |
| Total |           | 115990 | 100.000 | 15293032 | 100.000 |

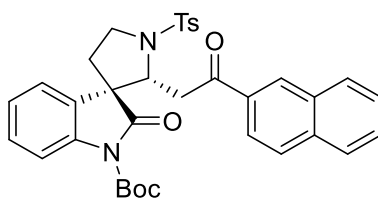

**3I**

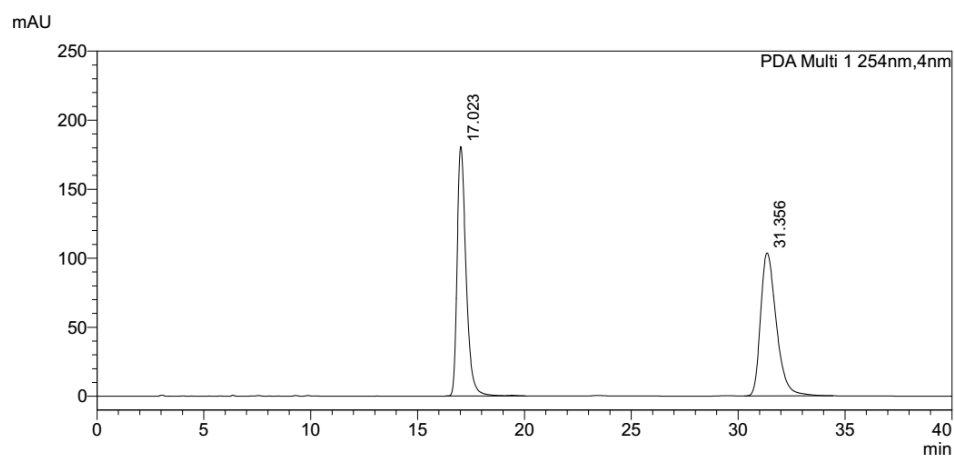

**<Peak Table>**

PDA Ch1 254nm

| Peak# | Ret. Time | Height | Height% | Area     | Area%   |
|-------|-----------|--------|---------|----------|---------|
| 1     | 17.023    | 180839 | 63.574  | 5253629  | 49.700  |
| 2     | 31.356    | 103615 | 36.426  | 5317133  | 50.300  |
| Total |           | 284455 | 100.000 | 10570762 | 100.000 |

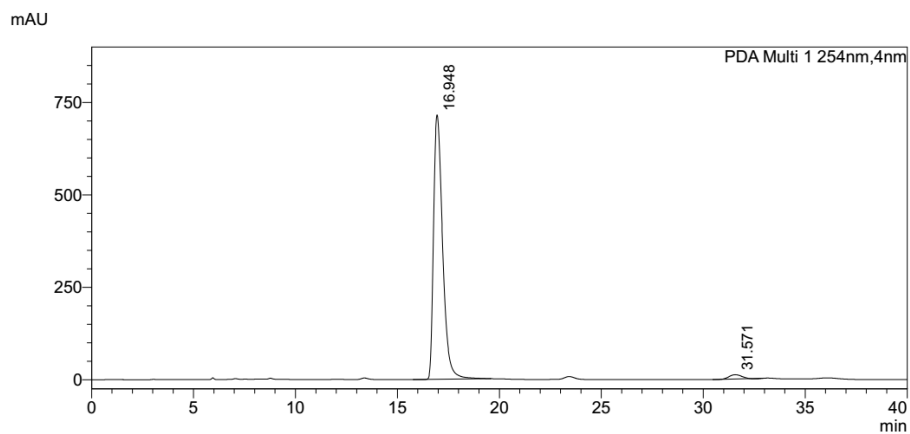

**<Peak Table>**

PDA Ch1 254nm

| Peak# | Ret. Time | Height | Height% | Area     | Area%   |
|-------|-----------|--------|---------|----------|---------|
| 1     | 16.948    | 715577 | 98.422  | 22170492 | 98.050  |
| 2     | 31.571    | 11471  | 1.578   | 440910   | 1.950   |
| Total |           | 727048 | 100.000 | 22611401 | 100.000 |

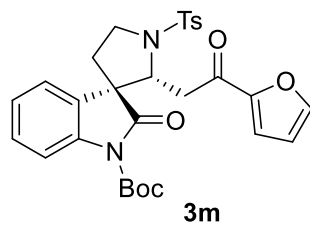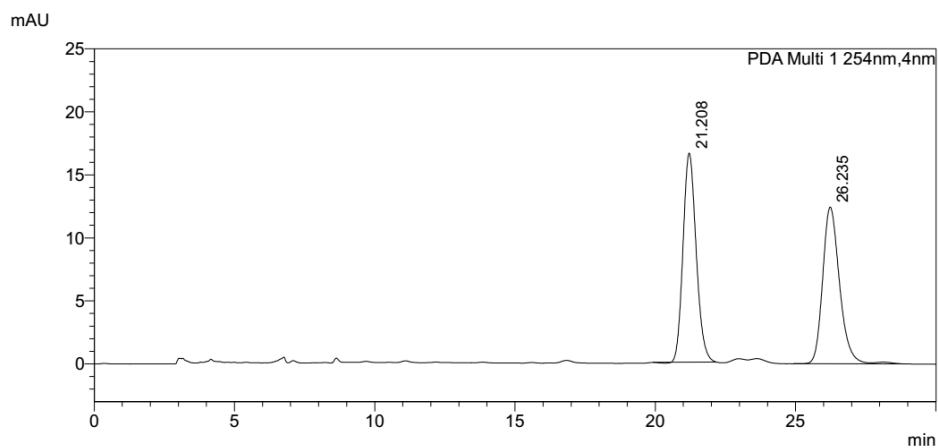

**<Peak Table>**

PDA Ch1 254nm

| Peak# | Ret. Time | Height | Height% | Area    | Area%   |
|-------|-----------|--------|---------|---------|---------|
| 1     | 21.208    | 16596  | 57.157  | 539732  | 50.766  |
| 2     | 26.235    | 12440  | 42.843  | 523437  | 49.234  |
| Total |           | 29035  | 100.000 | 1063168 | 100.000 |

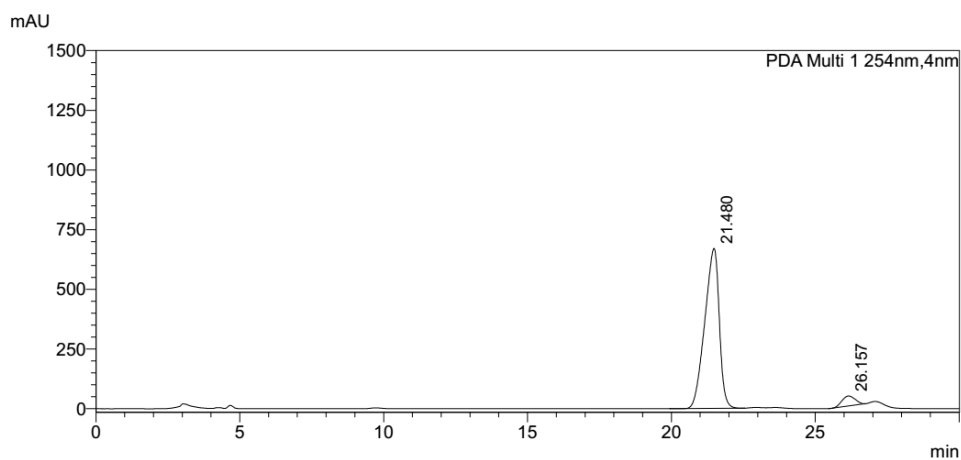

**<Peak Table>**

PDA Ch1 254nm

| Peak# | Ret. Time | Height | Height% | Area     | Area%   |
|-------|-----------|--------|---------|----------|---------|
| 1     | 21.480    | 670078 | 94.144  | 23494452 | 94.584  |
| 2     | 26.157    | 41681  | 5.856   | 1345338  | 5.416   |
| Total |           | 711759 | 100.000 | 24839789 | 100.000 |

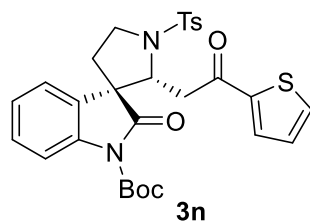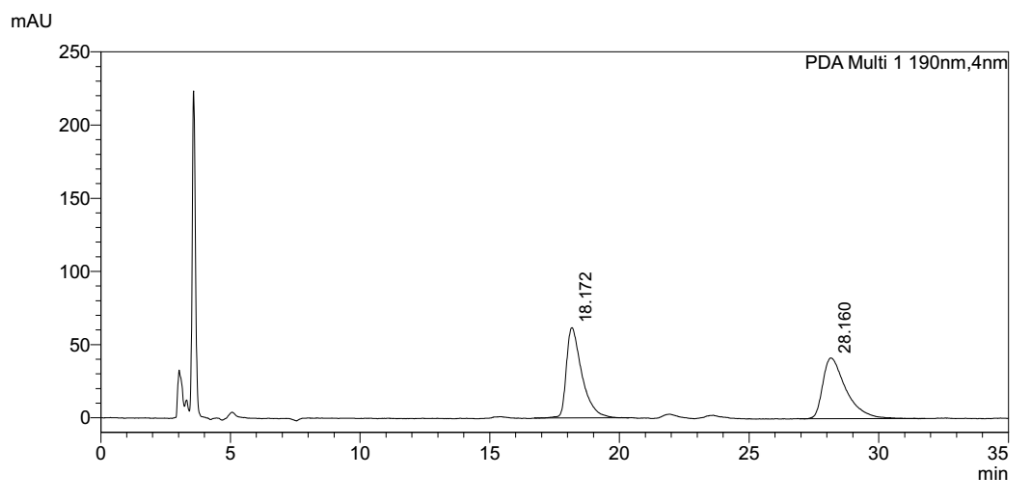

**<Peak Table>**

PDA Ch1 190nm

| Peak# | Ret. Time | Height | Height% | Area    | Area%   |
|-------|-----------|--------|---------|---------|---------|
| 1     | 18.172    | 61633  | 59.717  | 2572816 | 49.829  |
| 2     | 28.160    | 41575  | 40.283  | 2590489 | 50.171  |
| Total |           | 103209 | 100.000 | 5163305 | 100.000 |

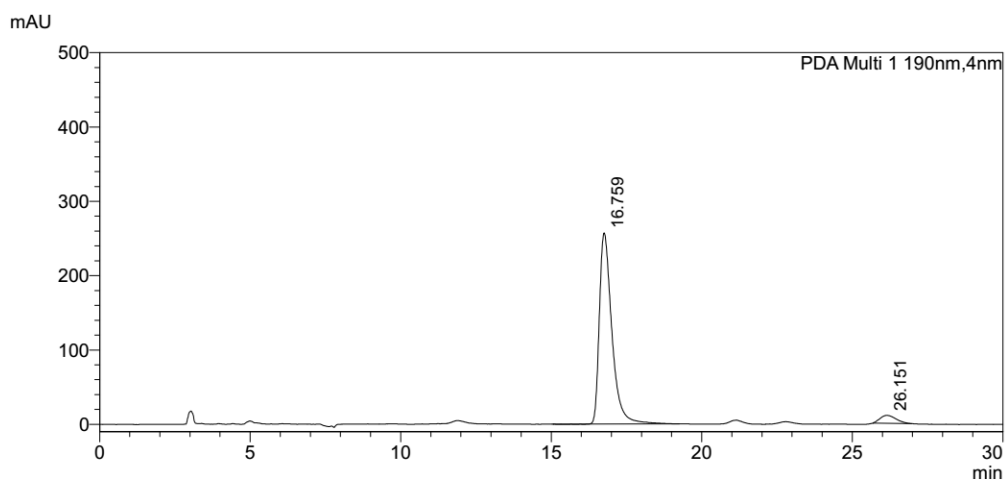

**<Peak Table>**

PDA Ch1 190nm

| Peak# | Ret. Time | Height | Height% | Area    | Area%   |
|-------|-----------|--------|---------|---------|---------|
| 1     | 16.759    | 257149 | 96.025  | 7424333 | 94.984  |
| 2     | 26.151    | 10646  | 3.975   | 392033  | 5.016   |
| Total |           | 267795 | 100.000 | 7816365 | 100.000 |

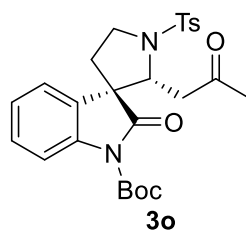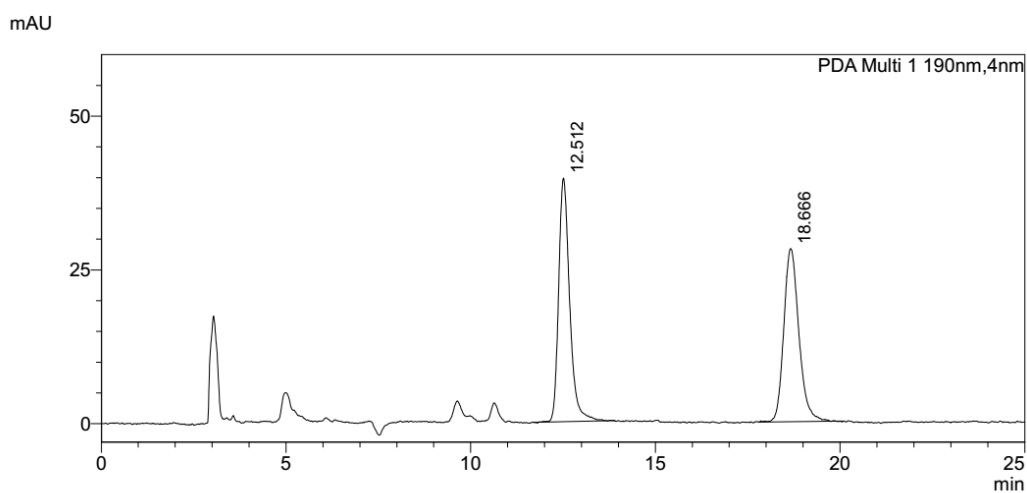

**<Peak Table>**

| PDA Ch1 190nm |           |        |         |         |         |
|---------------|-----------|--------|---------|---------|---------|
| Peak#         | Ret. Time | Height | Height% | Area    | Area%   |
| 1             | 12.512    | 39626  | 58.445  | 819720  | 50.540  |
| 2             | 18.666    | 28174  | 41.555  | 802216  | 49.460  |
| Total         |           | 67800  | 100.000 | 1621935 | 100.000 |

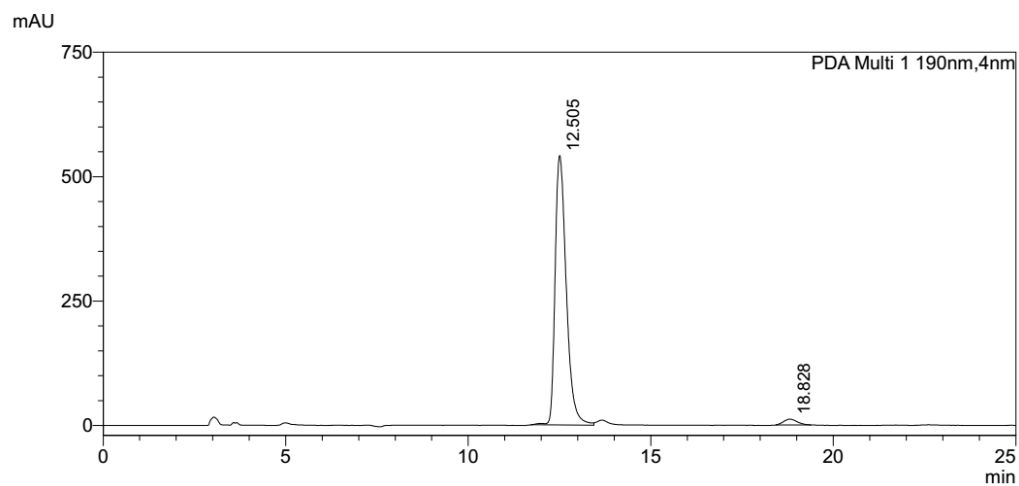

**<Peak Table>**

| PDA Ch1 190nm |           |        |         |          |         |
|---------------|-----------|--------|---------|----------|---------|
| Peak#         | Ret. Time | Height | Height% | Area     | Area%   |
| 1             | 12.505    | 541739 | 97.948  | 11515772 | 97.502  |
| 2             | 18.828    | 11348  | 2.052   | 294992   | 2.498   |
| Total         |           | 553087 | 100.000 | 11810764 | 100.000 |

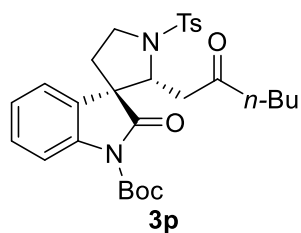

**<Chromatogram>**

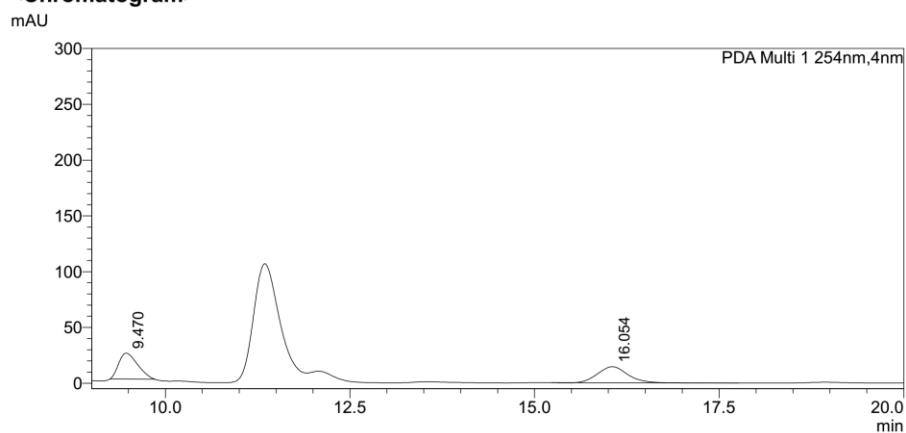

**<Peak Table>**

| PDA Ch1 254nm |           |        |         |        |         |
|---------------|-----------|--------|---------|--------|---------|
| Peak#         | Ret. Time | Height | Height% | Area   | Area%   |
| 1             | 9.470     | 23309  | 61.810  | 414003 | 50.453  |
| 2             | 16.054    | 14402  | 38.190  | 406566 | 49.547  |
| Total         |           | 37711  | 100.000 | 820569 | 100.000 |

mAU

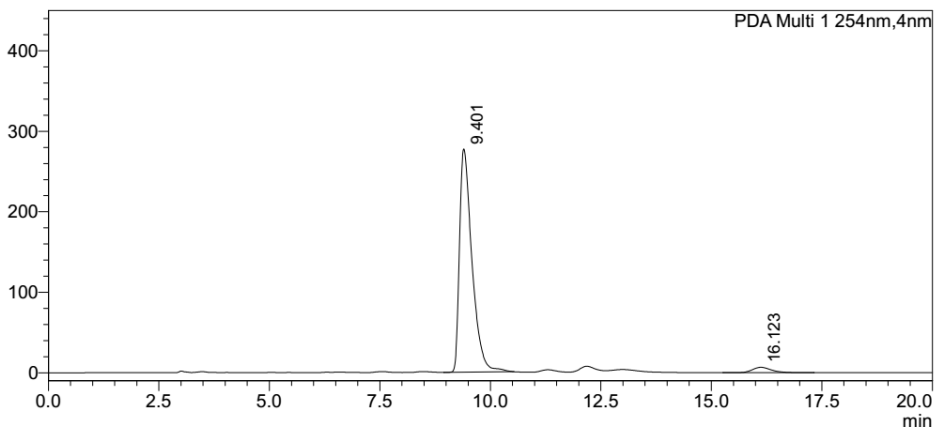

**<Peak Table>**

| PDA Ch1 254nm |           |        |         |         |         |
|---------------|-----------|--------|---------|---------|---------|
| Peak#         | Ret. Time | Height | Height% | Area    | Area%   |
| 1             | 9.401     | 277390 | 97.656  | 5450638 | 96.521  |
| 2             | 16.123    | 6659   | 2.344   | 196482  | 3.479   |
| Total         |           | 284049 | 100.000 | 5647120 | 100.000 |

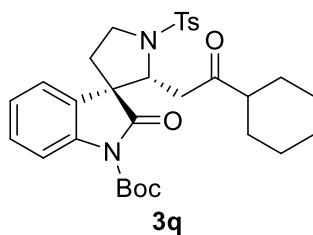

**<Chromatogram>**

mAU

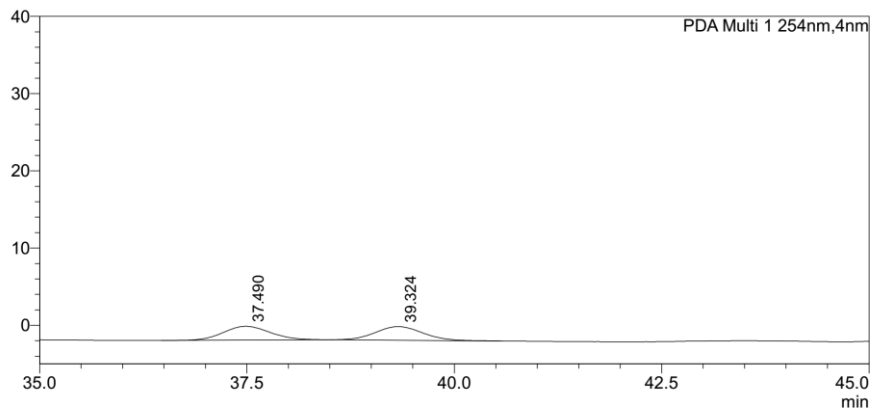

**<Peak Table>**

PDA Ch1 254nm

| Peak# | Ret. Time | Height | Height% | Area   | Area%   |
|-------|-----------|--------|---------|--------|---------|
| 1     | 37.490    | 1778   | 50.242  | 69570  | 49.662  |
| 2     | 39.324    | 1761   | 49.758  | 70516  | 50.338  |
| Total |           | 3538   | 100.000 | 140085 | 100.000 |

mAU

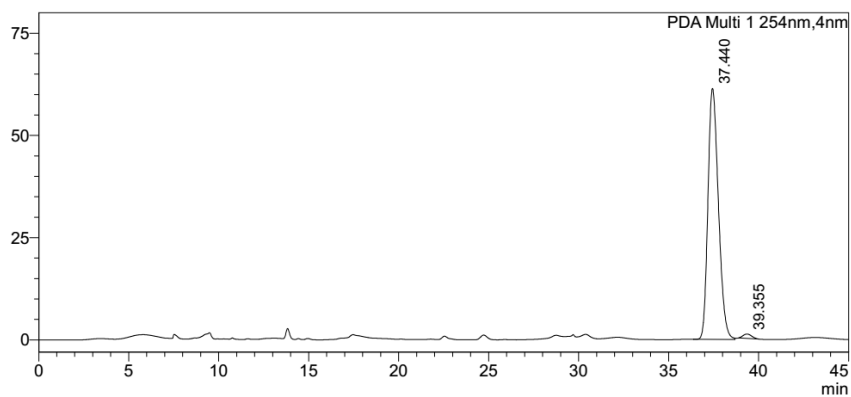

**<Peak Table>**

PDA Ch1 254nm

| Peak# | Ret. Time | Height | Height% | Area    | Area%   |
|-------|-----------|--------|---------|---------|---------|
| 1     | 37.440    | 61412  | 98.309  | 2484383 | 98.605  |
| 2     | 39.355    | 1056   | 1.691   | 35142   | 1.395   |
| Total |           | 62469  | 100.000 | 2519525 | 100.000 |



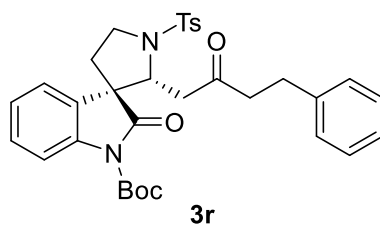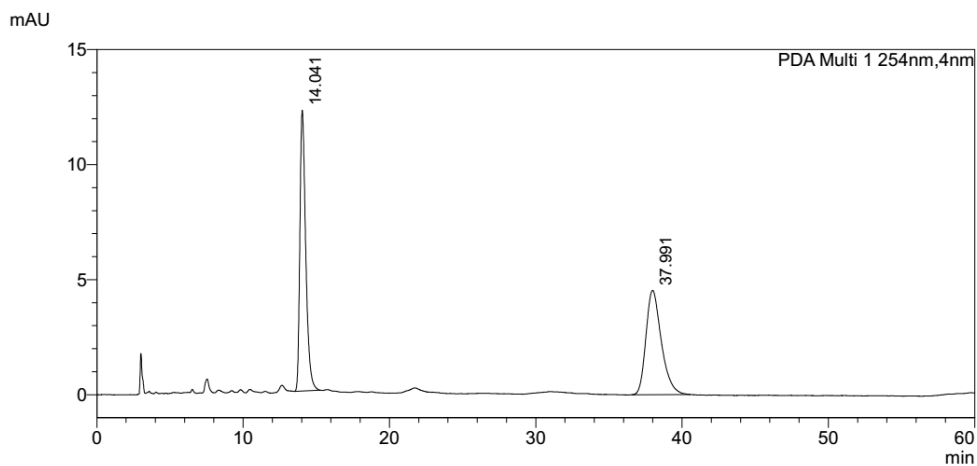

**<Peak Table>**

PDA Ch1 254nm

| Peak# | Ret. Time | Height | Height% | Area   | Area%   |
|-------|-----------|--------|---------|--------|---------|
| 1     | 14.041    | 12197  | 72.897  | 338900 | 50.569  |
| 2     | 37.991    | 4535   | 27.103  | 331272 | 49.431  |
| Total |           | 16732  | 100.000 | 670173 | 100.000 |

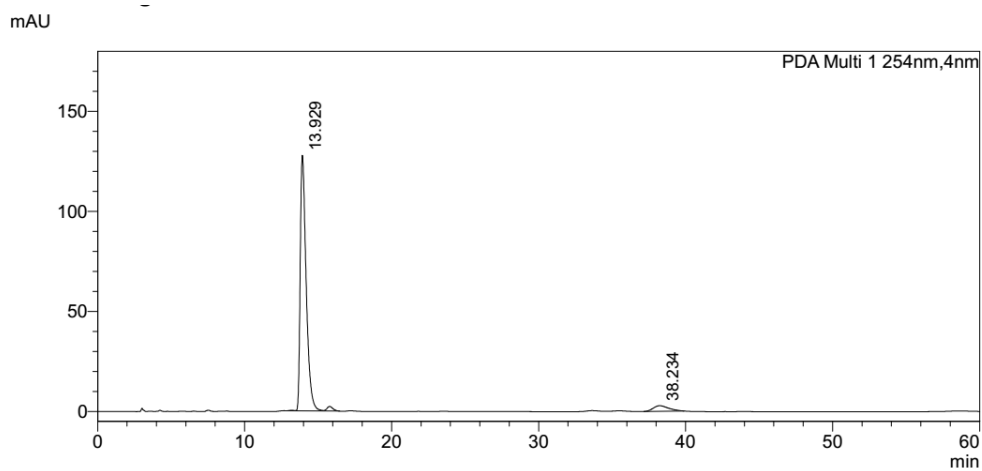

**<Peak Table>**

PDA Ch1 254nm

| Peak# | Ret. Time | Height | Height% | Area    | Area%   |
|-------|-----------|--------|---------|---------|---------|
| 1     | 13.929    | 127751 | 97.857  | 3658996 | 94.716  |
| 2     | 38.234    | 2798   | 2.143   | 204131  | 5.284   |
| Total |           | 130549 | 100.000 | 3863127 | 100.000 |

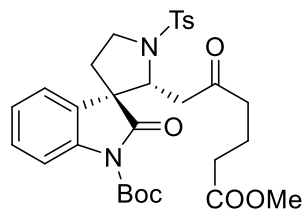

**3s**

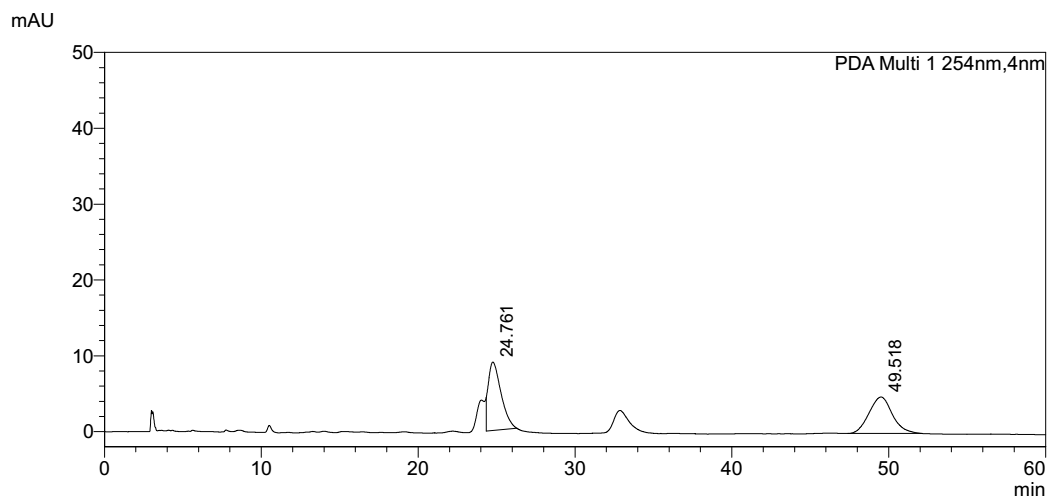

**<Peak Table>**

PDA Ch1 254nm

| Peak# | Ret. Time | Height | Height% | Area    | Area%   |
|-------|-----------|--------|---------|---------|---------|
| 1     | 24.761    | 9026   | 65.224  | 511457  | 50.609  |
| 2     | 49.518    | 4812   | 34.776  | 499147  | 49.391  |
| Total |           | 13838  | 100.000 | 1010604 | 100.000 |

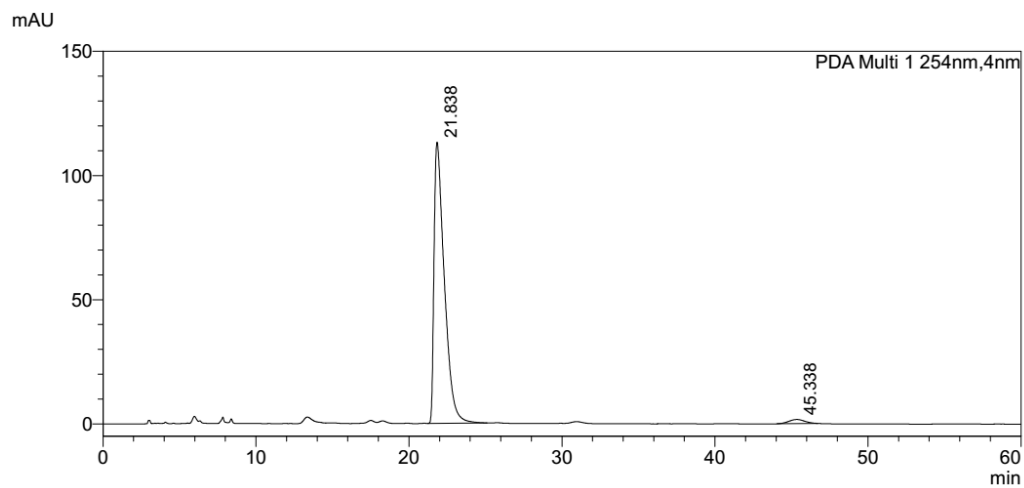

**<Peak Table>**

PDA Ch1 254nm

| Peak# | Ret. Time | Height | Height% | Area    | Area%   |
|-------|-----------|--------|---------|---------|---------|
| 1     | 21.838    | 113218 | 98.546  | 5299472 | 97.771  |
| 2     | 45.338    | 1670   | 1.454   | 120835  | 2.229   |
| Total |           | 114889 | 100.000 | 5420307 | 100.000 |

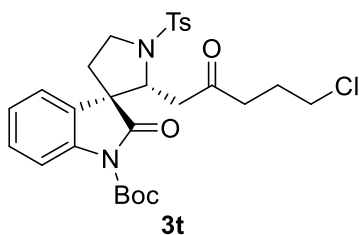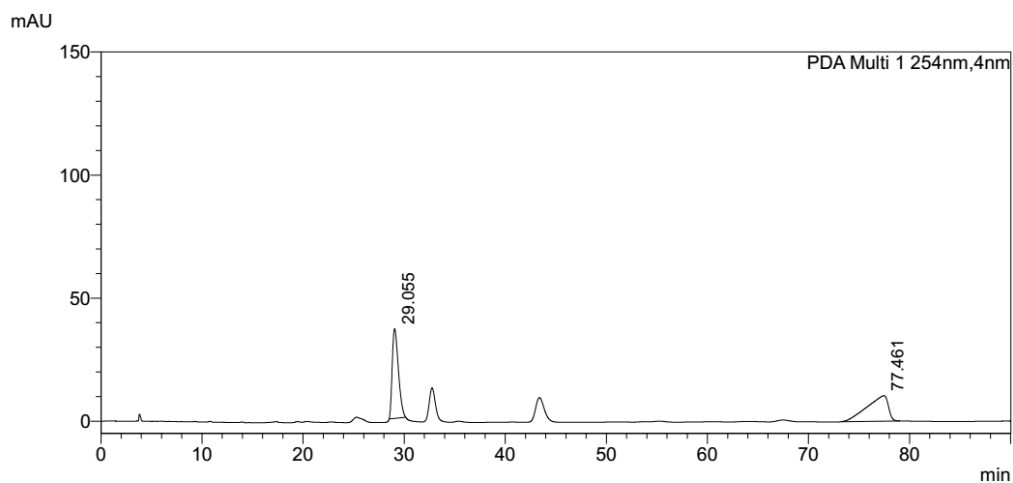

**<Peak Table>**

PDA Ch1 254nm

| Peak# | Ret. Time | Height | Height% | Area    | Area%   |
|-------|-----------|--------|---------|---------|---------|
| 1     | 29.055    | 36478  | 77.890  | 1541836 | 50.306  |
| 2     | 77.461    | 10354  | 22.110  | 1523052 | 49.694  |
| Total |           | 46832  | 100.000 | 3064888 | 100.000 |

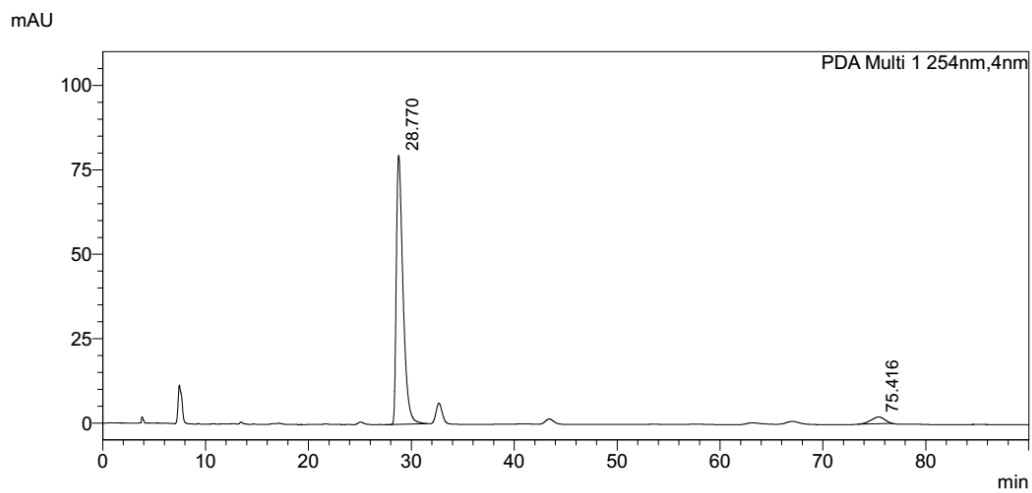

**<Peak Table>**

PDA Ch1 254nm

| Peak# | Ret. Time | Height | Height% | Area    | Area%   |
|-------|-----------|--------|---------|---------|---------|
| 1     | 28.770    | 79707  | 97.575  | 3608104 | 95.173  |
| 2     | 75.416    | 1981   | 2.425   | 182989  | 4.827   |
| Total |           | 81688  | 100.000 | 3791092 | 100.000 |

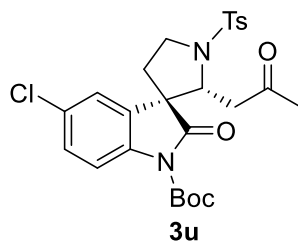

### <Chromatogram>

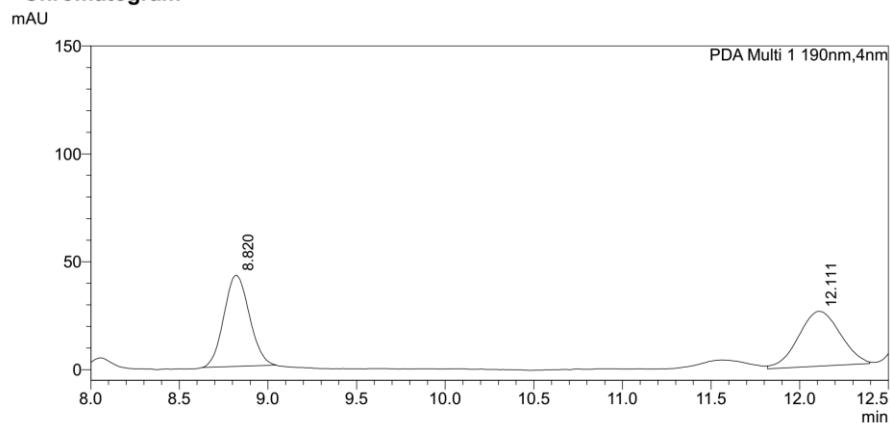

### <Peak Table>

| PDA Ch1 190nm |           |        |         |        |         |
|---------------|-----------|--------|---------|--------|---------|
| Peak#         | Ret. Time | Height | Height% | Area   | Area%   |
| 1             | 8.820     | 42299  | 62.481  | 423825 | 50.337  |
| 2             | 12.111    | 25400  | 37.519  | 418156 | 49.663  |
| Total         |           | 67699  | 100.000 | 841980 | 100.000 |

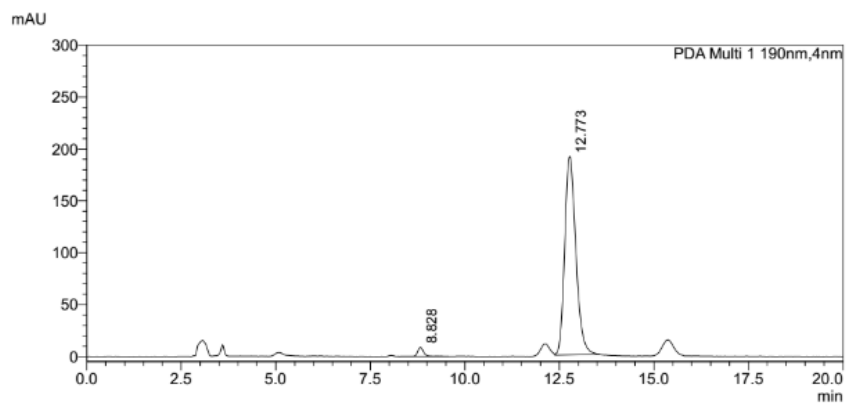

### <Peak Table>

| PDA Ch1 190nm |           |        |         |         |         |
|---------------|-----------|--------|---------|---------|---------|
| Peak#         | Ret. Time | Height | Height% | Area    | Area%   |
| 1             | 8.828     | 8556   | 4.286   | 92762   | 2.309   |
| 2             | 12.773    | 191096 | 95.714  | 3924636 | 97.691  |
| Total         |           | 199652 | 100.000 | 4017398 | 100.000 |

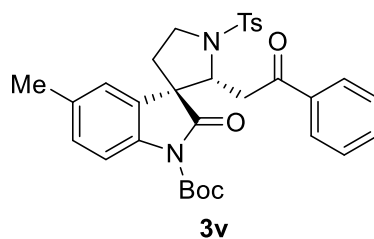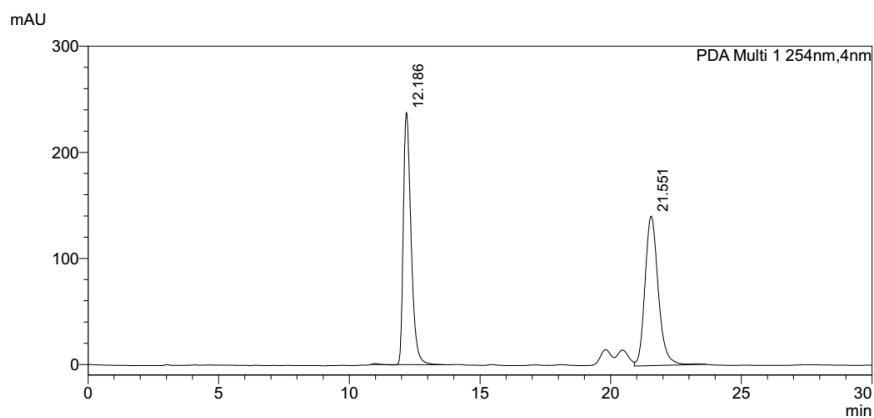

**<Peak Table>**

PDA Ch1 254nm

| Peak# | Ret. Time | Height | Height% | Area    | Area%   |
|-------|-----------|--------|---------|---------|---------|
| 1     | 12.186    | 237889 | 62.763  | 4897110 | 49.523  |
| 2     | 21.551    | 141140 | 37.237  | 4991349 | 50.477  |
| Total |           | 379029 | 100.000 | 9888459 | 100.000 |

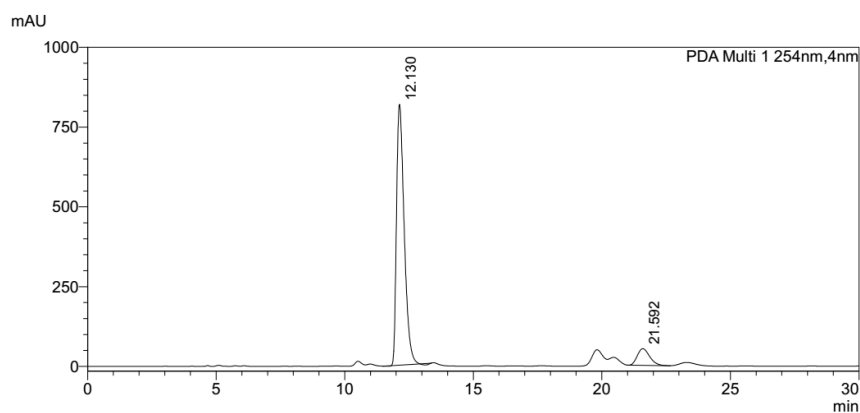

**<Peak Table>**

PDA Ch1 254nm

| Peak# | Ret. Time | Height | Height% | Area     | Area%   |
|-------|-----------|--------|---------|----------|---------|
| 1     | 12.130    | 817546 | 93.990  | 16894298 | 90.626  |
| 2     | 21.592    | 52272  | 6.010   | 1747582  | 9.374   |
| Total |           | 869818 | 100.000 | 18641880 | 100.000 |

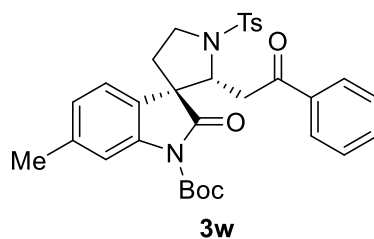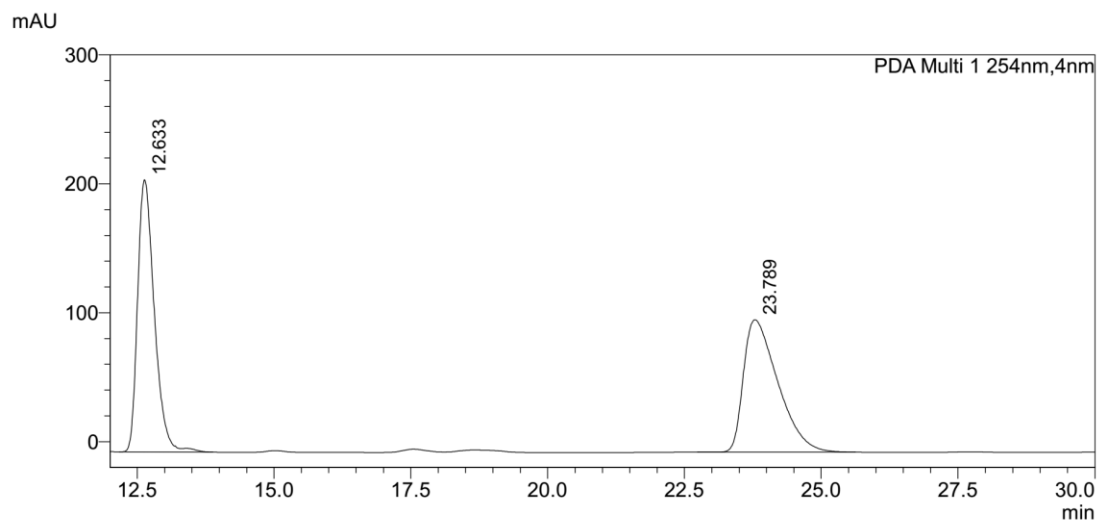

**<Peak Table>**

PDA Ch1 254nm

| Peak# | Ret. Time | Height | Height% | Area    | Area%   |
|-------|-----------|--------|---------|---------|---------|
| 1     | 12.633    | 211097 | 67.287  | 4495725 | 50.074  |
| 2     | 23.789    | 102630 | 32.713  | 4482481 | 49.926  |
| Total |           | 313728 | 100.000 | 8978205 | 100.000 |

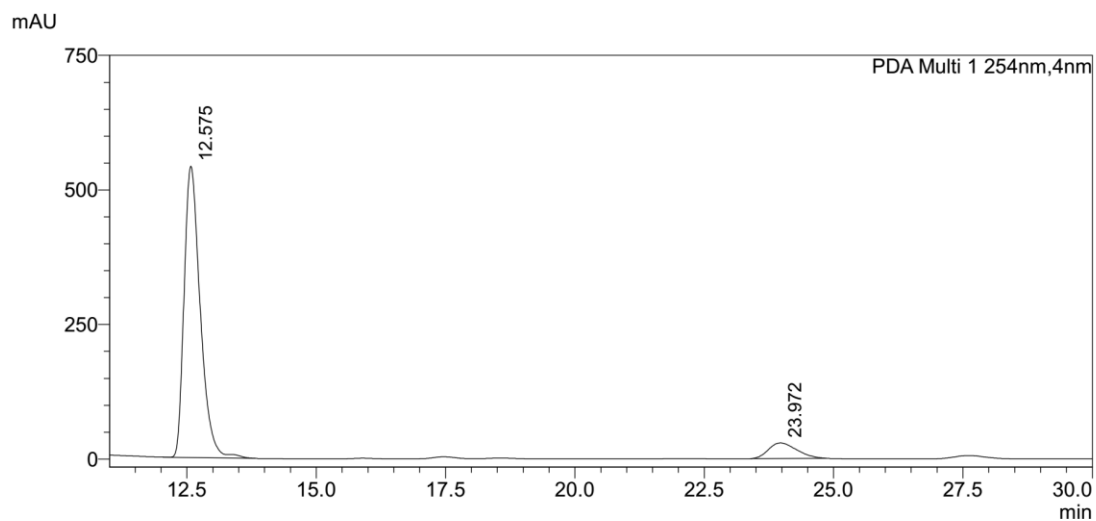

**<Peak Table>**

PDA Ch1 254nm

| Peak# | Ret. Time | Height | Height% | Area     | Area%   |
|-------|-----------|--------|---------|----------|---------|
| 1     | 12.575    | 541298 | 94.930  | 11759253 | 91.464  |
| 2     | 23.972    | 28912  | 5.070   | 1097518  | 8.536   |
| Total |           | 570209 | 100.000 | 12856771 | 100.000 |

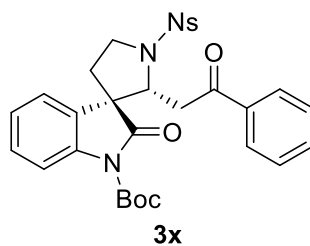

### <Chromatogram>

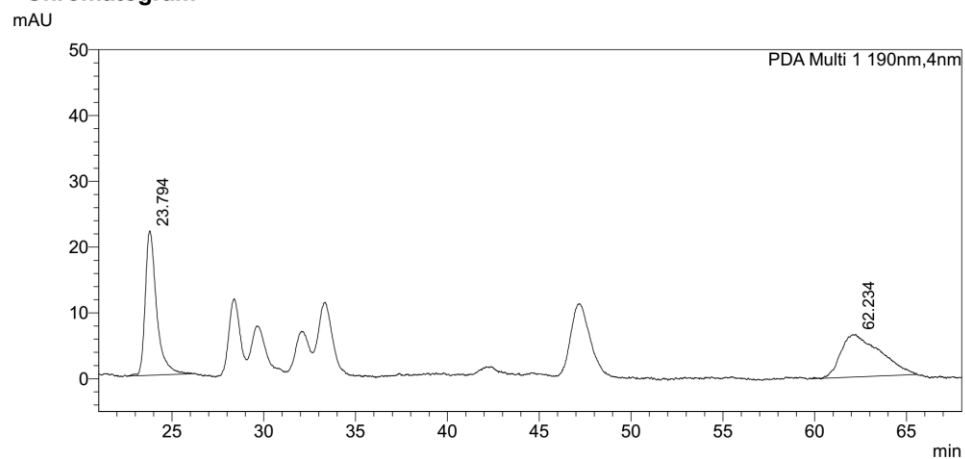

### <Peak Table>

| PDA Ch1 190nm |           |        |         |         |         |
|---------------|-----------|--------|---------|---------|---------|
| Peak#         | Ret. Time | Height | Height% | Area    | Area%   |
| 1             | 23.794    | 21982  | 77.260  | 947606  | 49.753  |
| 2             | 62.234    | 6470   | 22.740  | 957007  | 50.247  |
| Total         |           | 28452  | 100.000 | 1904613 | 100.000 |

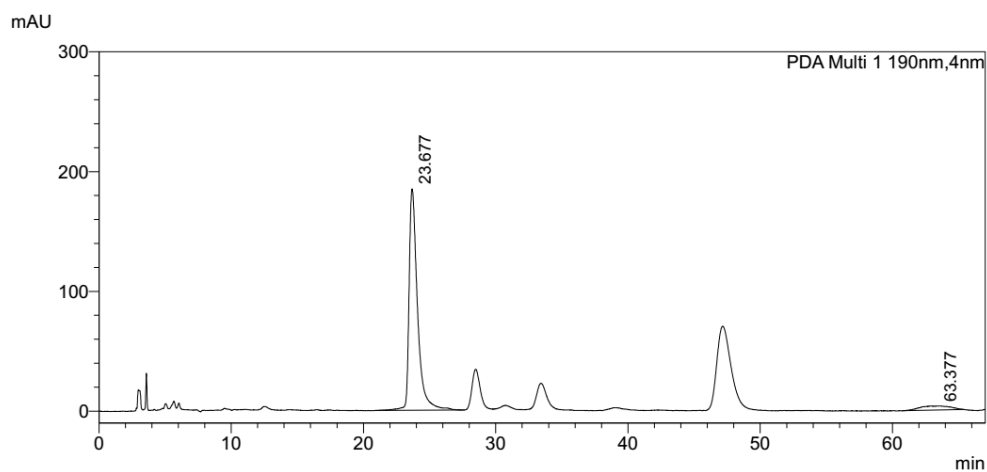

### <Peak Table>

| PDA Ch1 190nm |           |        |         |         |         |
|---------------|-----------|--------|---------|---------|---------|
| Peak#         | Ret. Time | Height | Height% | Area    | Area%   |
| 1             | 23.677    | 184960 | 98.166  | 8197015 | 93.601  |
| 2             | 63.377    | 3456   | 1.834   | 560341  | 6.399   |
| Total         |           | 188416 | 100.000 | 8757356 | 100.000 |

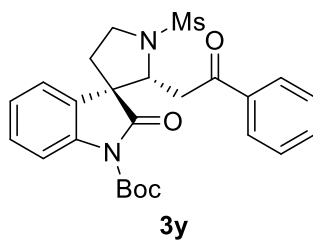

### <Chromatogram>

mAU

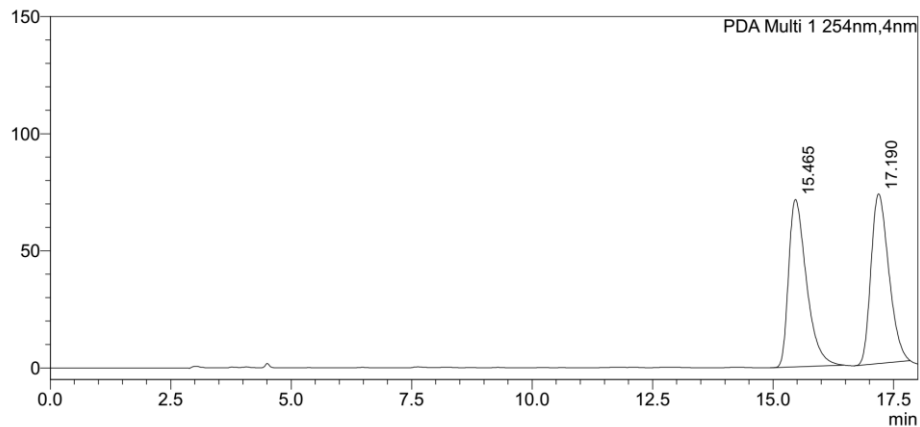

### <Peak Table>

PDA Ch1 254nm

| Peak# | Ret. Time | Height | Height% | Area    | Area%   |
|-------|-----------|--------|---------|---------|---------|
| 1     | 15.465    | 71477  | 49.672  | 1846071 | 49.727  |
| 2     | 17.190    | 72421  | 50.328  | 1866319 | 50.273  |
| Total |           | 143899 | 100.000 | 3712390 | 100.000 |

mAU

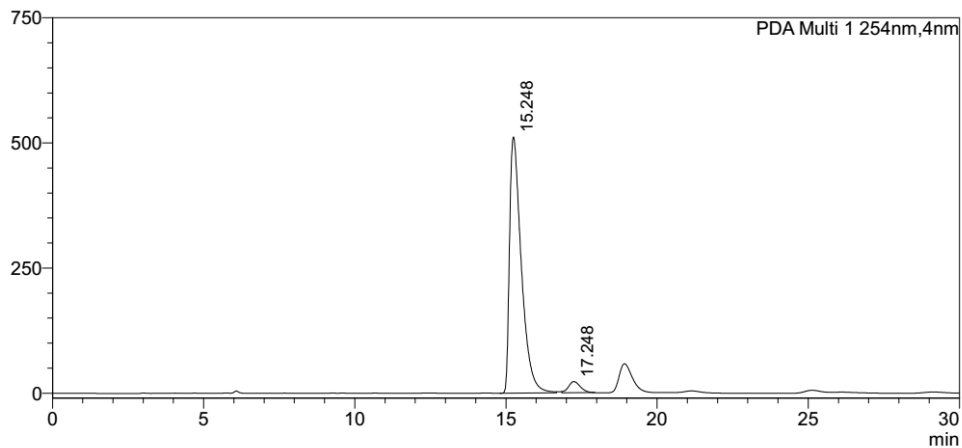

### <Peak Table>

PDA Ch1 254nm

| Peak# | Ret. Time | Height | Height% | Area     | Area%   |
|-------|-----------|--------|---------|----------|---------|
| 1     | 15.248    | 511956 | 95.832  | 13874201 | 95.840  |
| 2     | 17.248    | 22268  | 4.168   | 602174   | 4.160   |
| Total |           | 534224 | 100.000 | 14476375 | 100.000 |



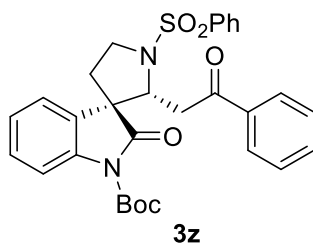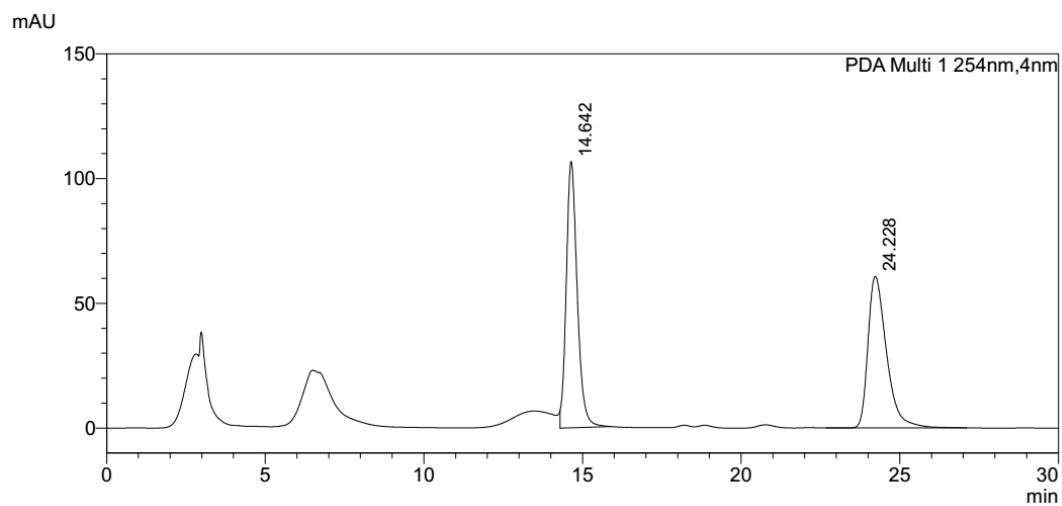

#### <Peak Table>

PDA Ch1 254nm

| Peak# | Ret. Time | Height | Height% | Area    | Area%   |
|-------|-----------|--------|---------|---------|---------|
| 1     | 14.642    | 106762 | 63.730  | 2559501 | 50.884  |
| 2     | 24.228    | 60761  | 36.270  | 2470582 | 49.116  |
| Total |           | 167523 | 100.000 | 5030083 | 100.000 |

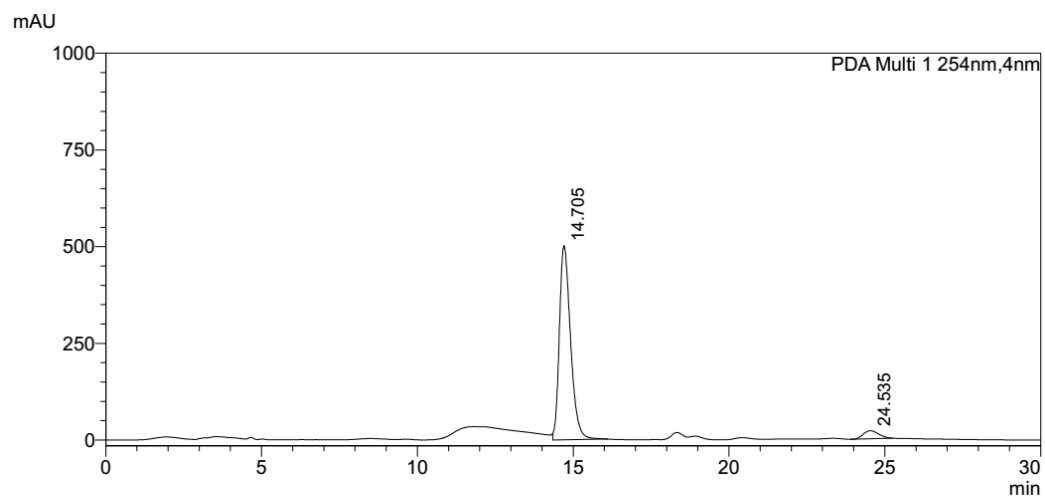

#### <Peak Table>

PDA Ch1 254nm

| Peak# | Ret. Time | Height | Height% | Area     | Area%   |
|-------|-----------|--------|---------|----------|---------|
| 1     | 14.705    | 501897 | 96.017  | 12541471 | 94.553  |
| 2     | 24.535    | 20821  | 3.983   | 722550   | 5.447   |
| Total |           | 522719 | 100.000 | 13264021 | 100.000 |

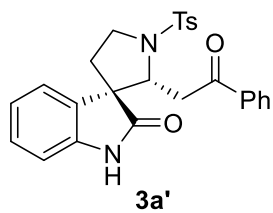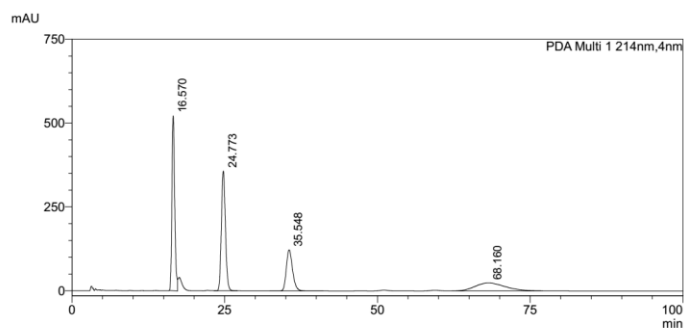

<Peak Table>

| Peak# | Ret. Time | Height  | Height% | Area     | Area%   |
|-------|-----------|---------|---------|----------|---------|
| 1     | 16.570    | 521364  | 50.849  | 16483223 | 33.033  |
| 2     | 24.773    | 357232  | 34.841  | 16505533 | 33.078  |
| 3     | 35.548    | 122880  | 11.985  | 8701808  | 17.439  |
| 4     | 68.160    | 23847   | 2.326   | 8208889  | 16.451  |
| Total |           | 1025323 | 100.000 | 49899452 | 100.000 |

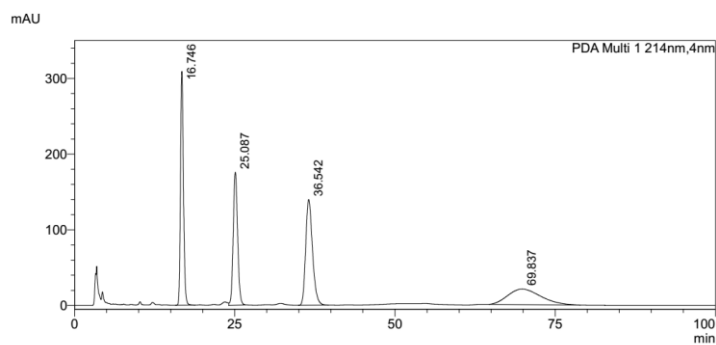

<Peak Table>

| Peak# | Ret. Time | Height | Height% | Area     | Area%   |
|-------|-----------|--------|---------|----------|---------|
| 1     | 16.746    | 309085 | 47.912  | 9943187  | 27.651  |
| 2     | 25.087    | 175785 | 27.249  | 8387483  | 23.325  |
| 3     | 36.542    | 139703 | 21.656  | 10297555 | 28.637  |
| 4     | 69.837    | 20535  | 3.183   | 7331132  | 20.387  |
| Total |           | 645108 | 100.000 | 35959357 | 100.000 |

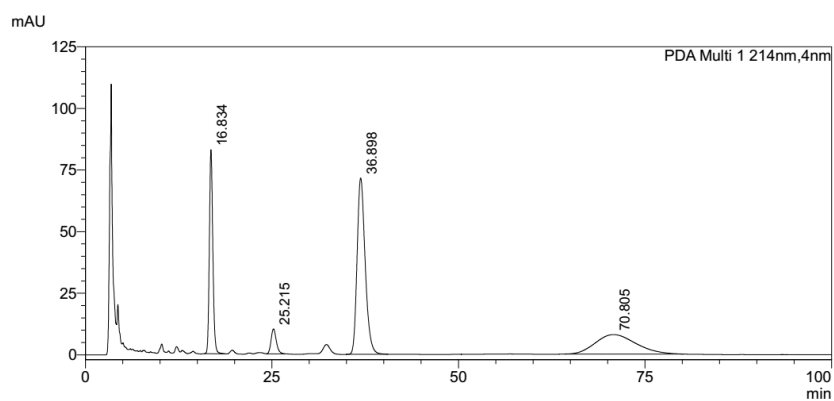

**<Peak Table>**

| PDA Ch1 214nm |           |        |         |          |         |
|---------------|-----------|--------|---------|----------|---------|
| Peak#         | Ret. Time | Height | Height% | Area     | Area%   |
| 1             | 16.834    | 82788  | 48.016  | 2679647  | 23.195  |
| 2             | 25.215    | 10147  | 5.885   | 489887   | 4.240   |
| 3             | 36.898    | 71604  | 41.529  | 5395755  | 46.706  |
| 4             | 70.805    | 7879   | 4.570   | 2987355  | 25.859  |
| Total         |           | 172417 | 100.000 | 11552643 | 100.000 |

**<Chromatogram>**

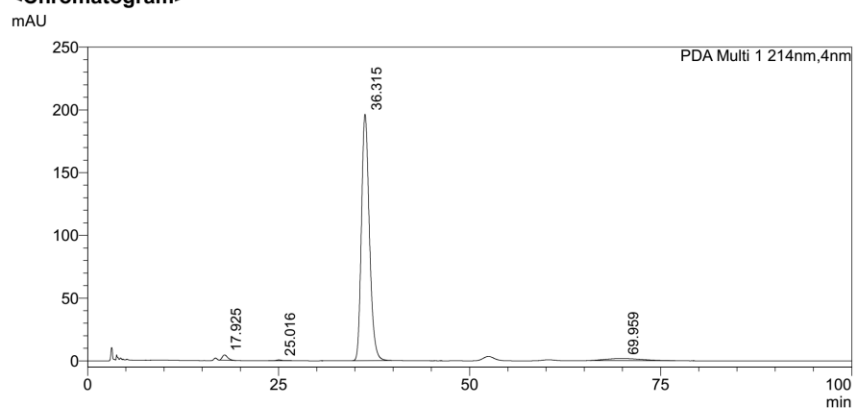

**<Peak Table>**

| PDA Ch1 214nm |           |        |         |          |         |
|---------------|-----------|--------|---------|----------|---------|
| Peak#         | Ret. Time | Height | Height% | Area     | Area%   |
| 1             | 17.925    | 4226   | 2.084   | 207525   | 1.382   |
| 2             | 25.016    | 615    | 0.303   | 31149    | 0.207   |
| 3             | 36.315    | 196375 | 96.824  | 14253785 | 94.945  |
| 4             | 69.959    | 1600   | 0.789   | 520228   | 3.465   |
| Total         |           | 202817 | 100.000 | 15012687 | 100.000 |

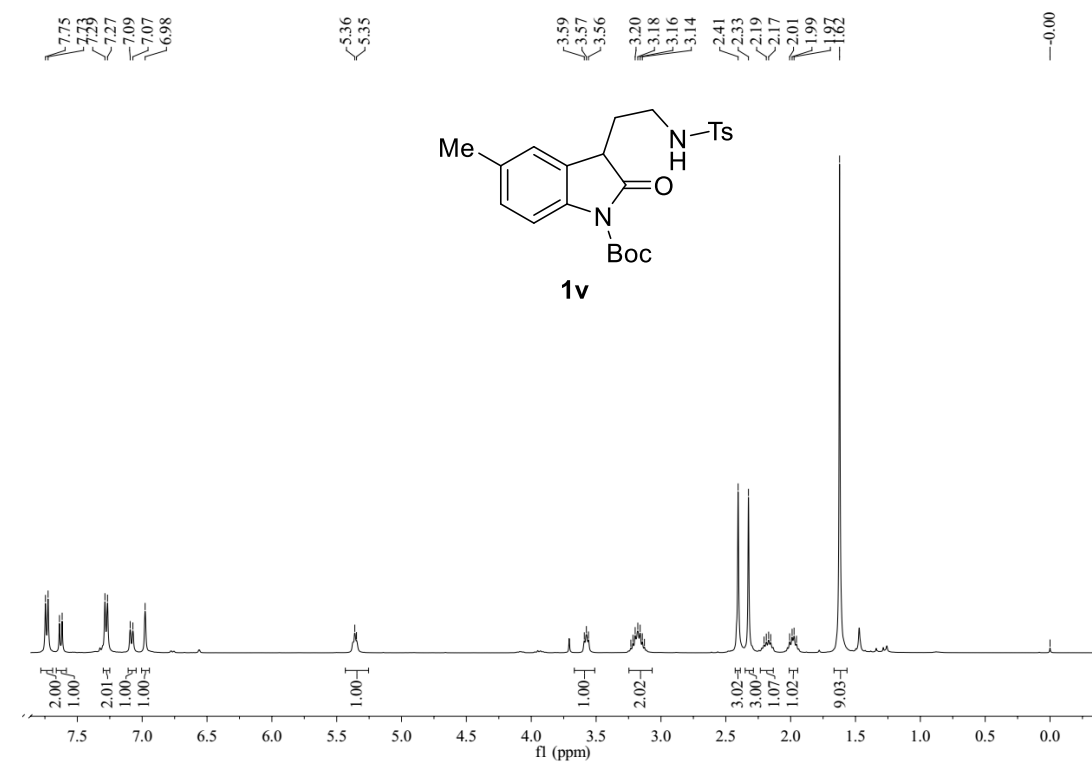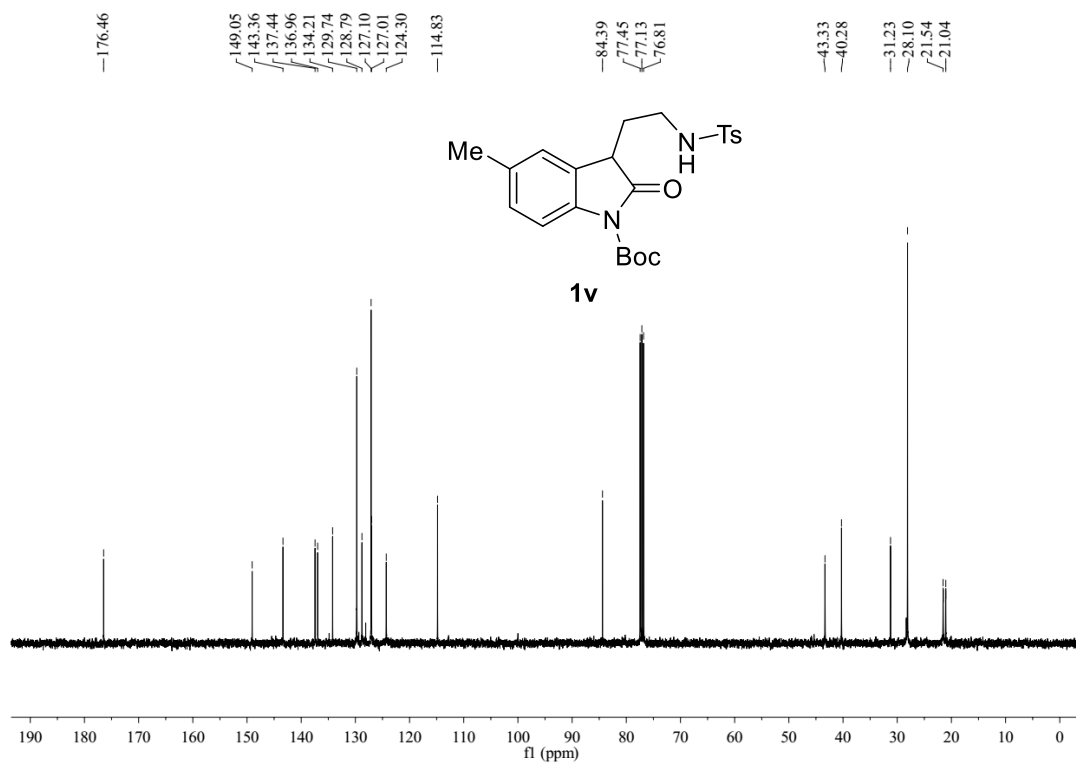

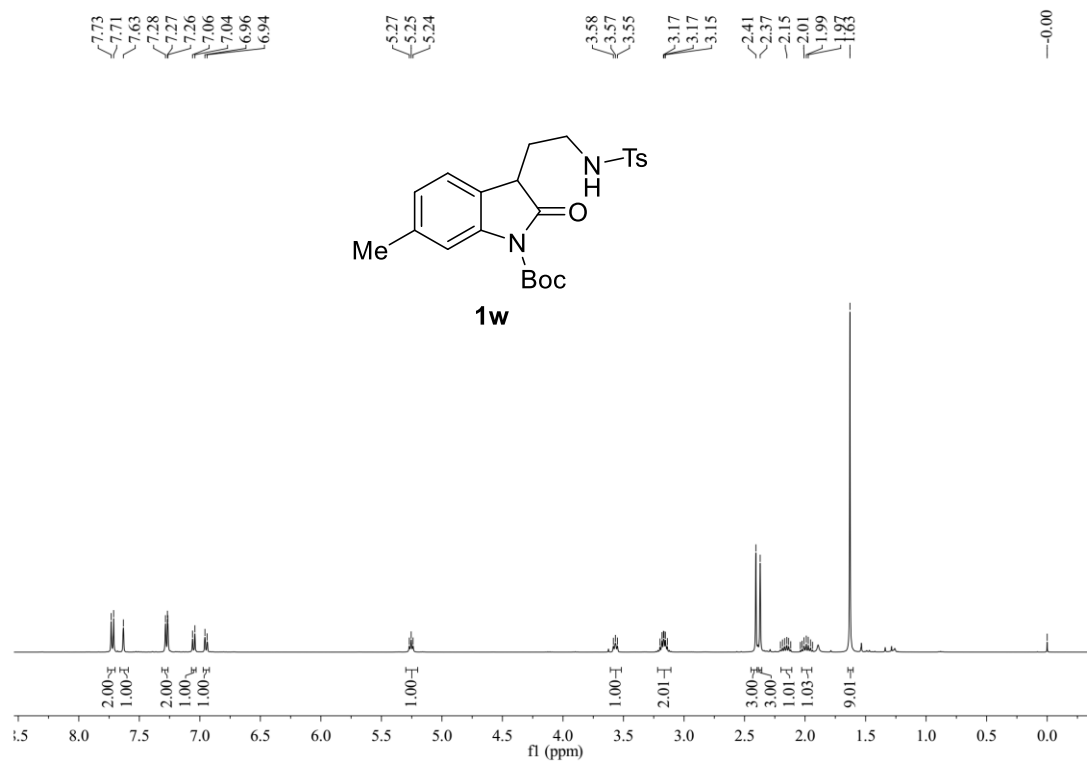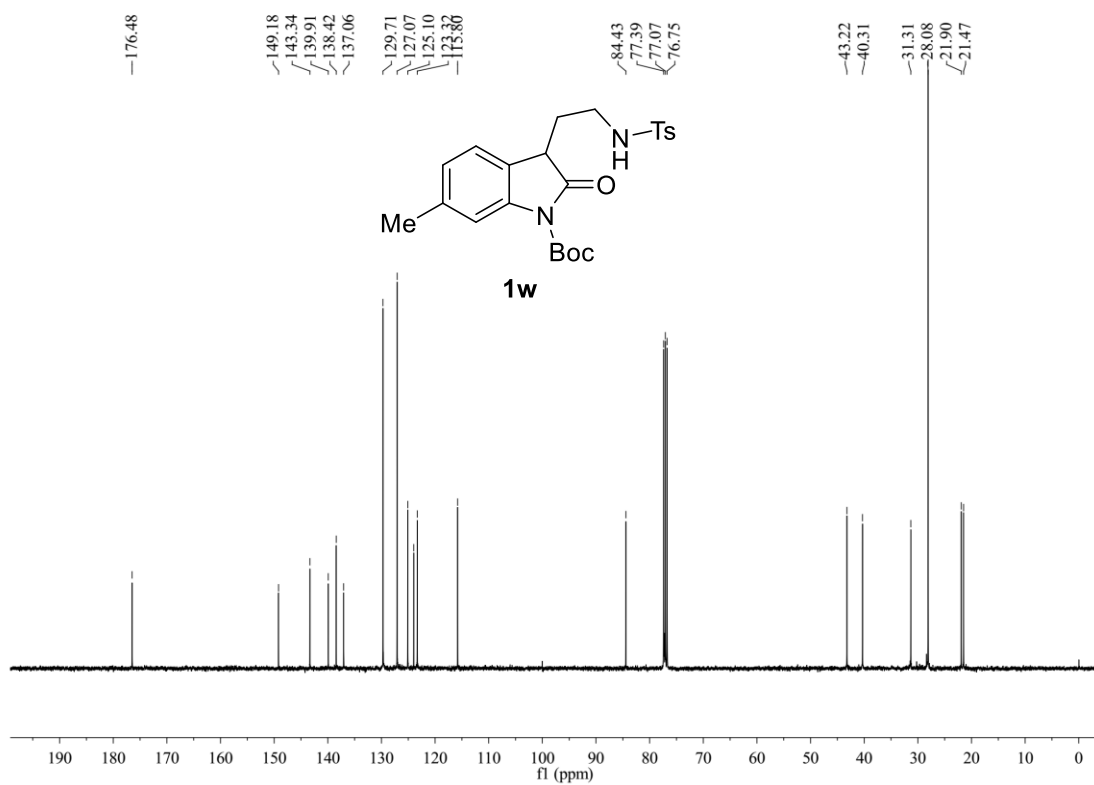

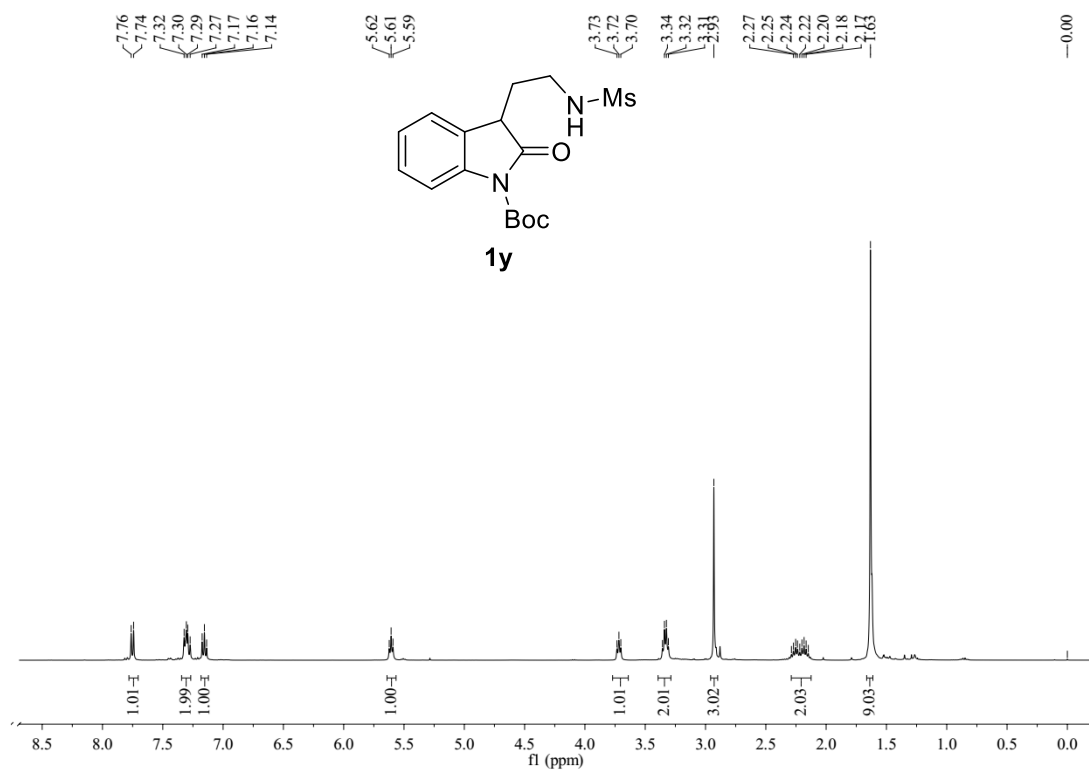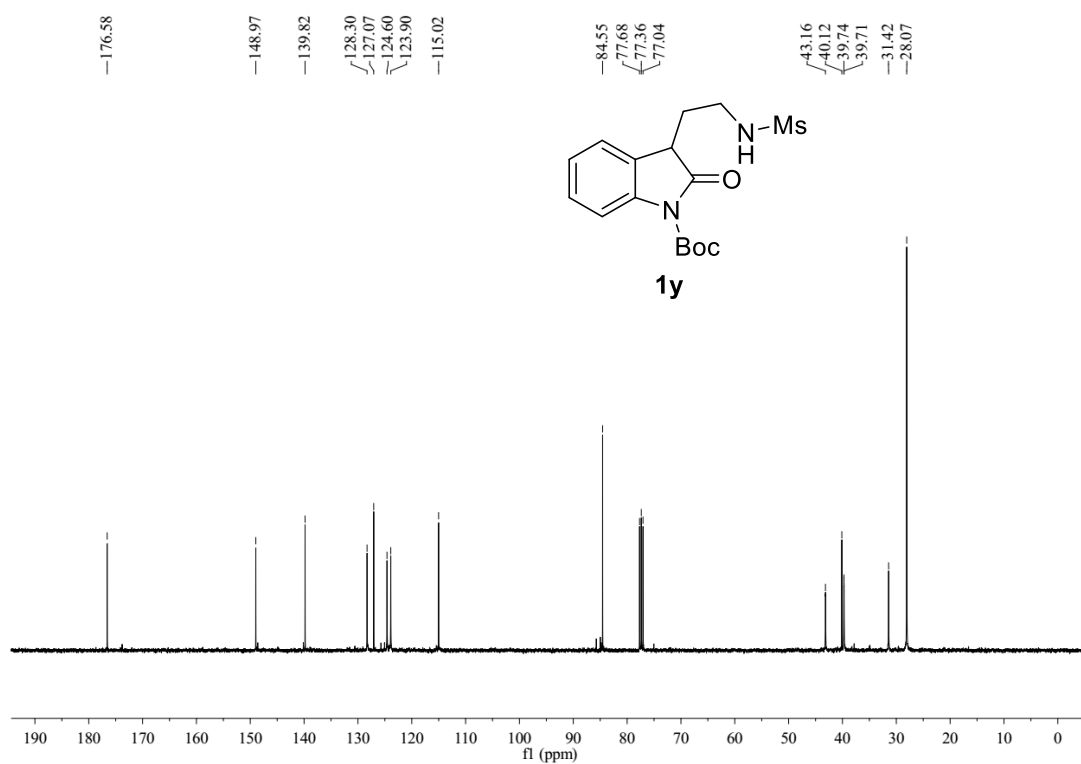

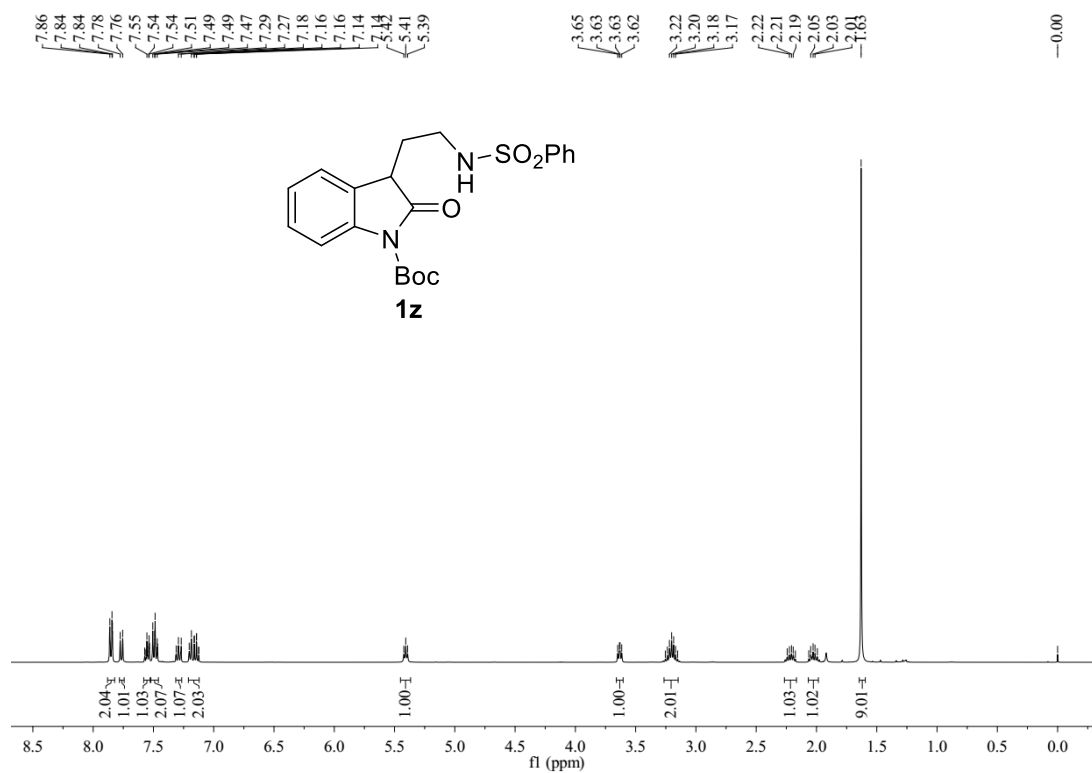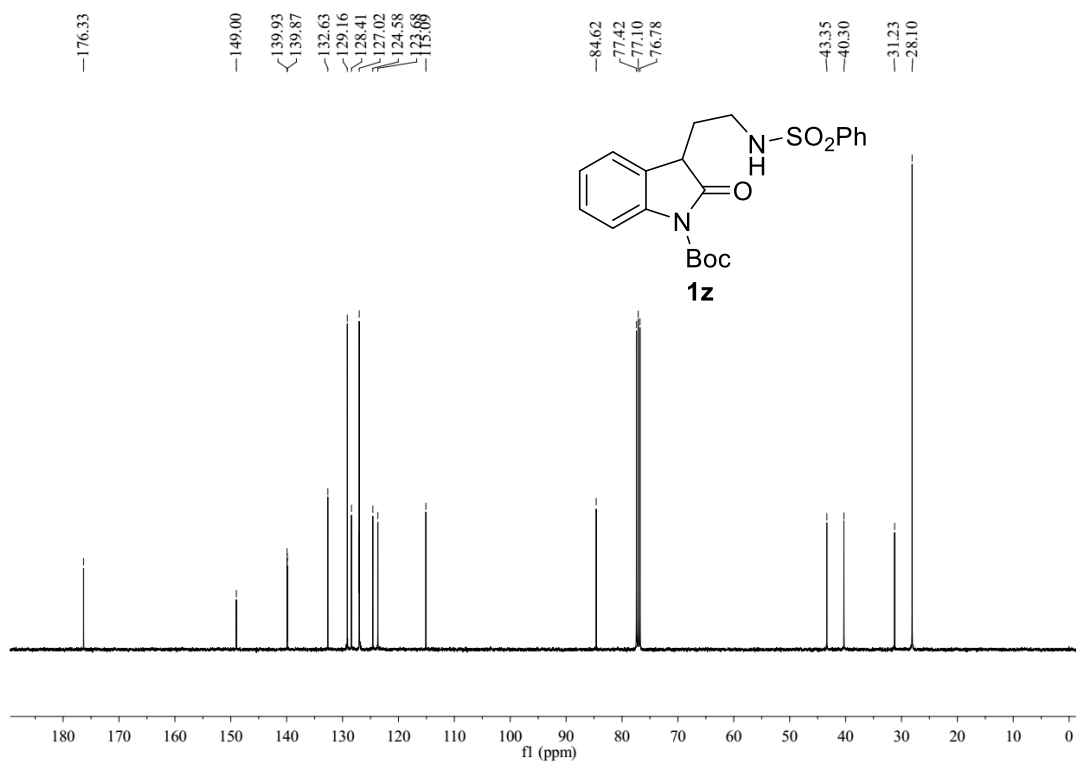

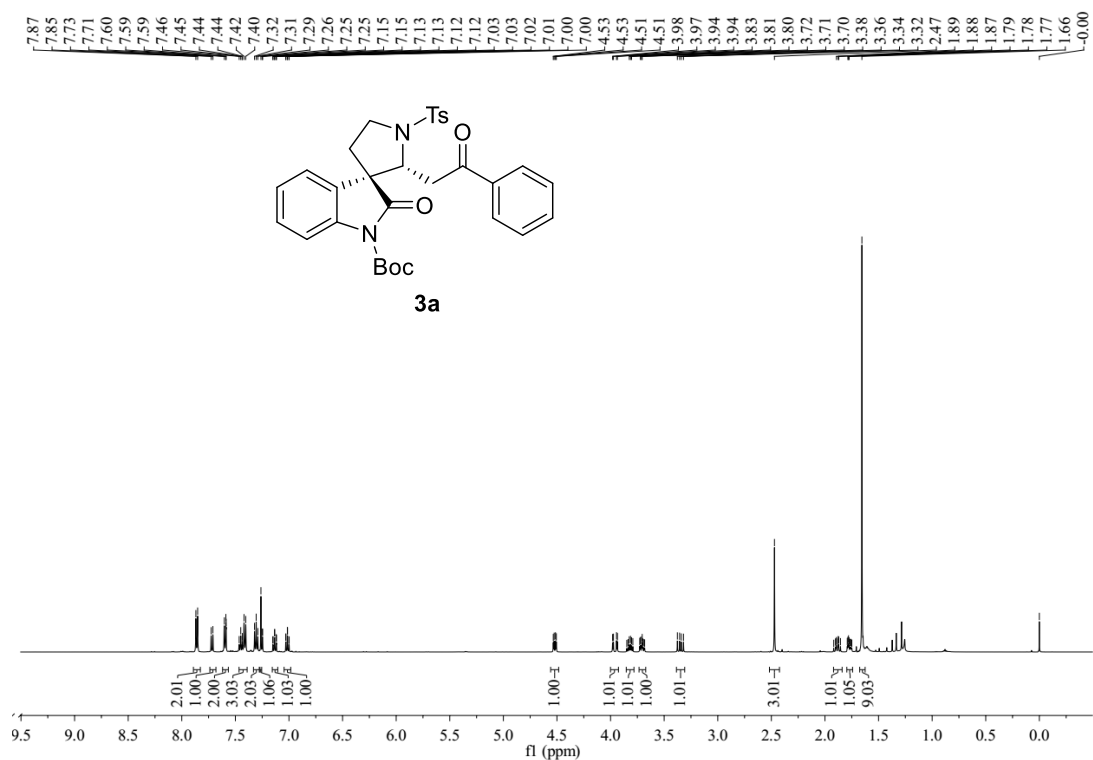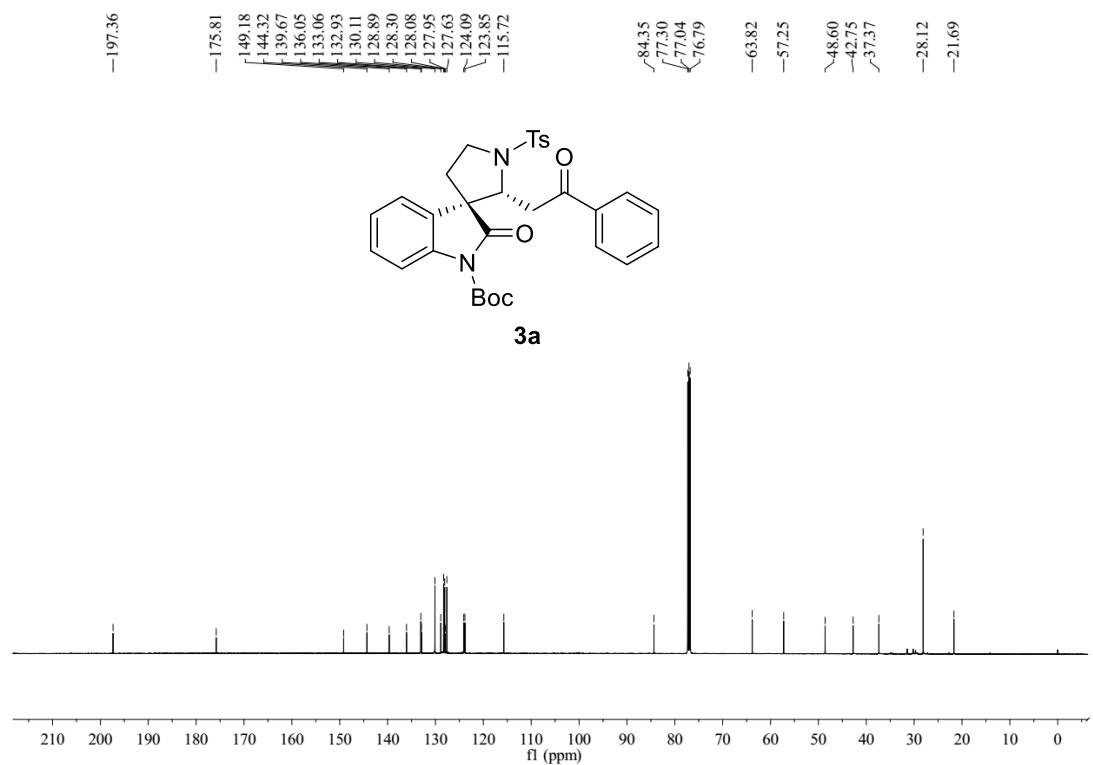



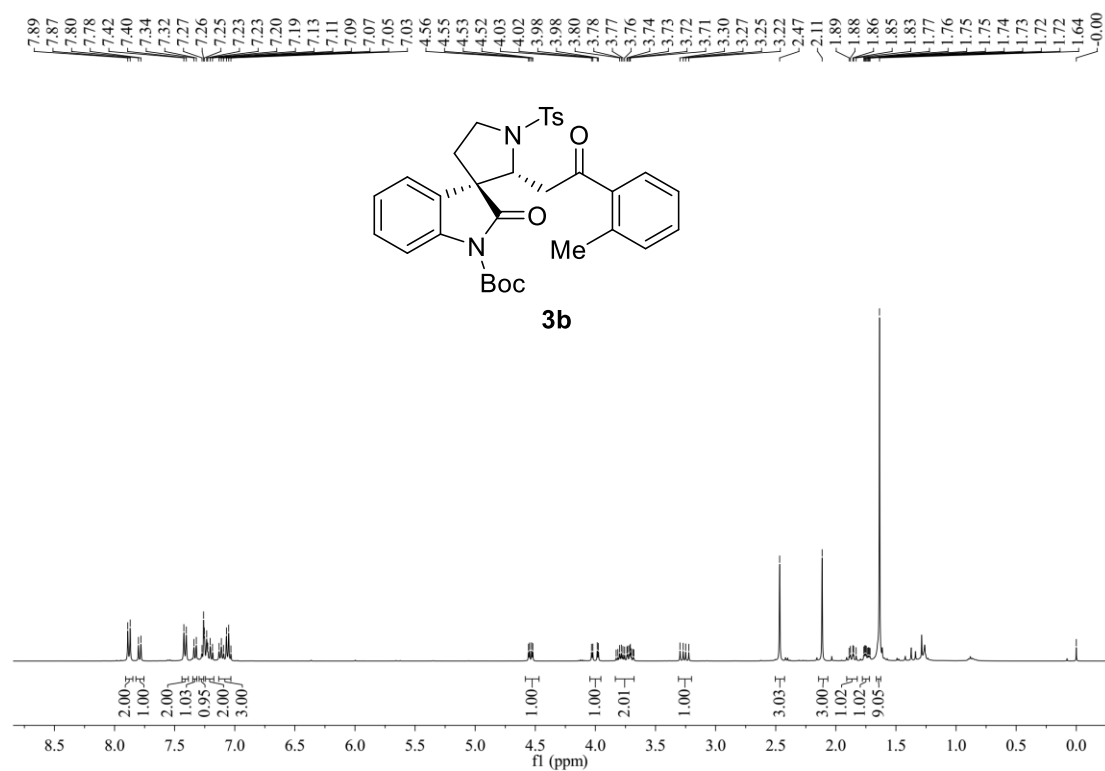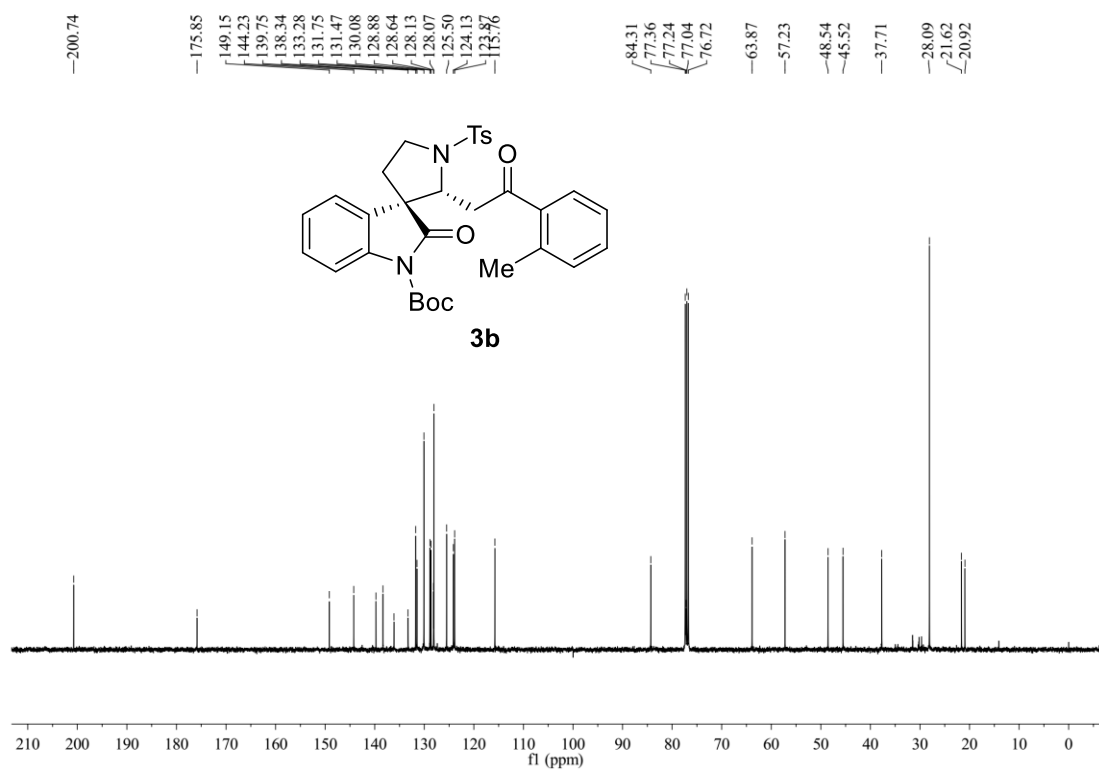

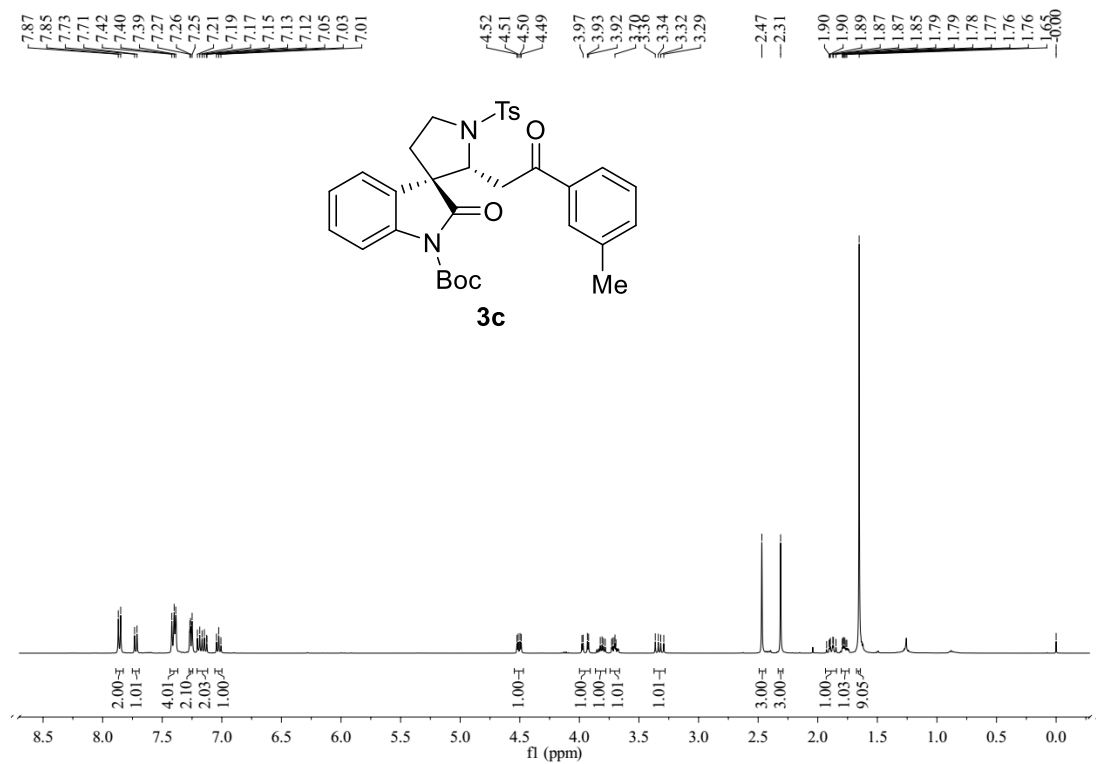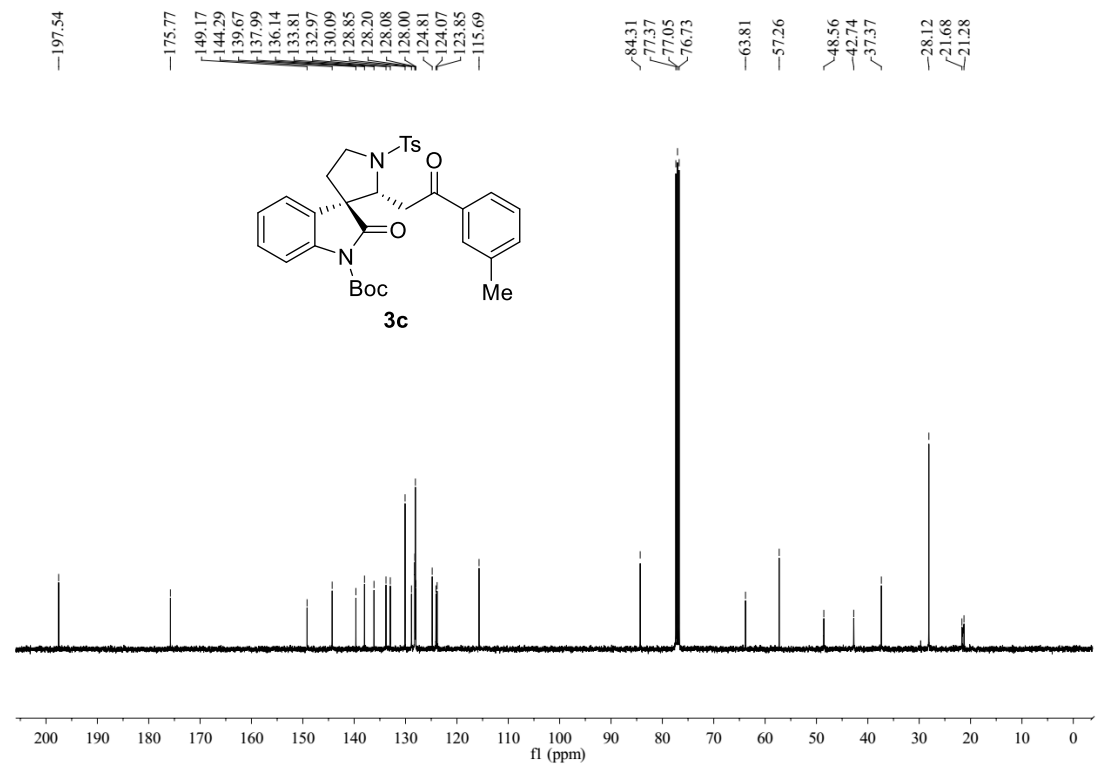

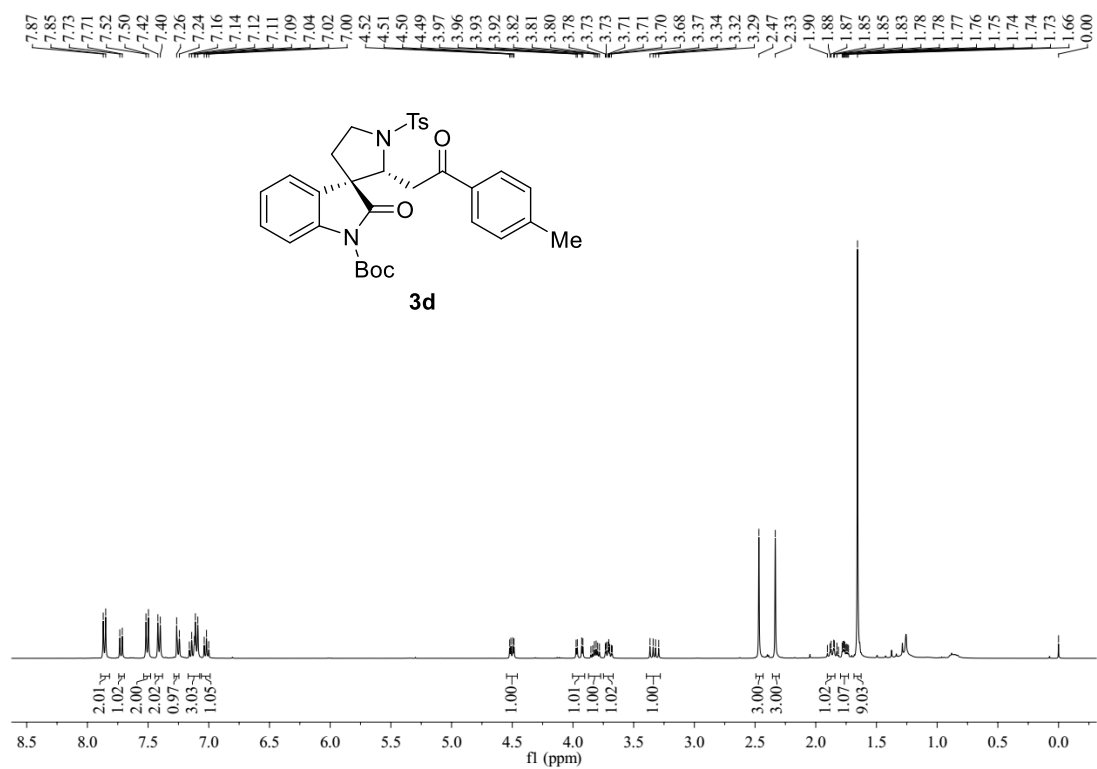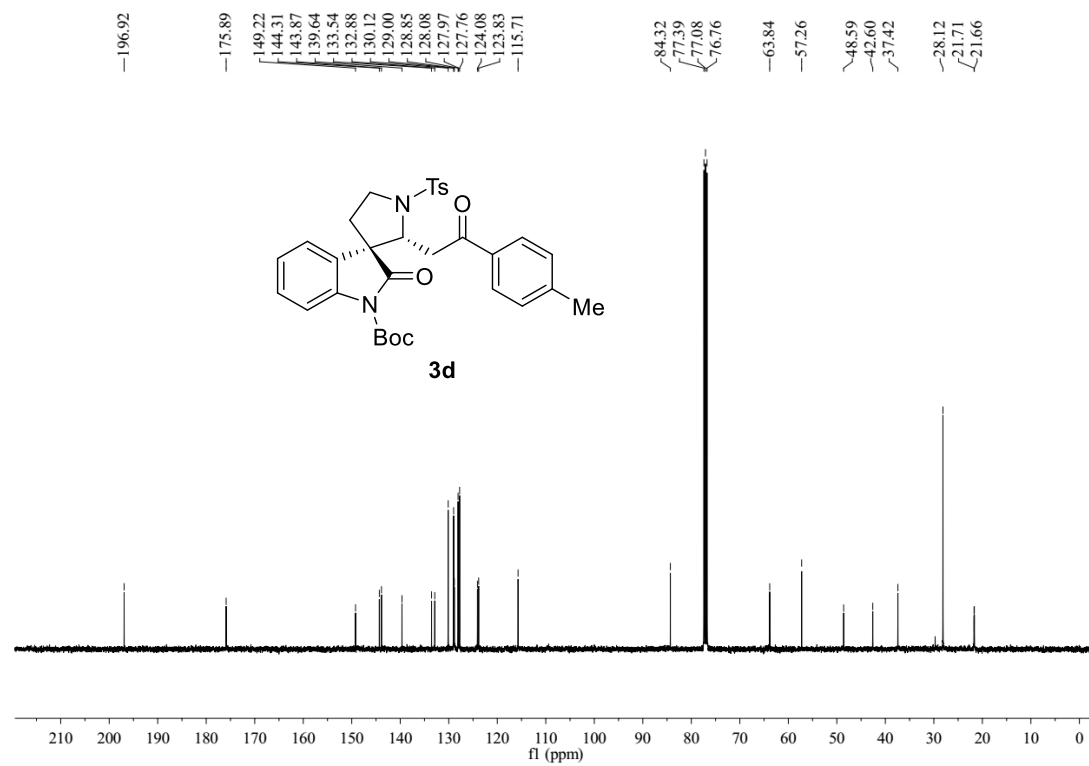

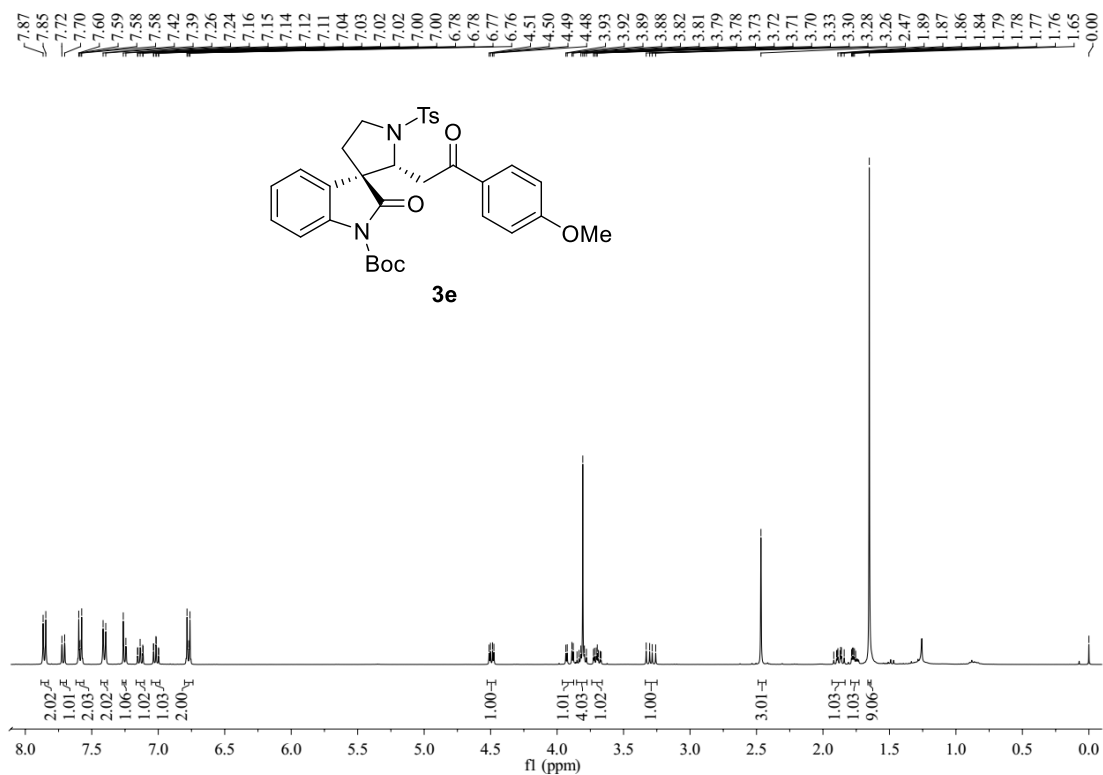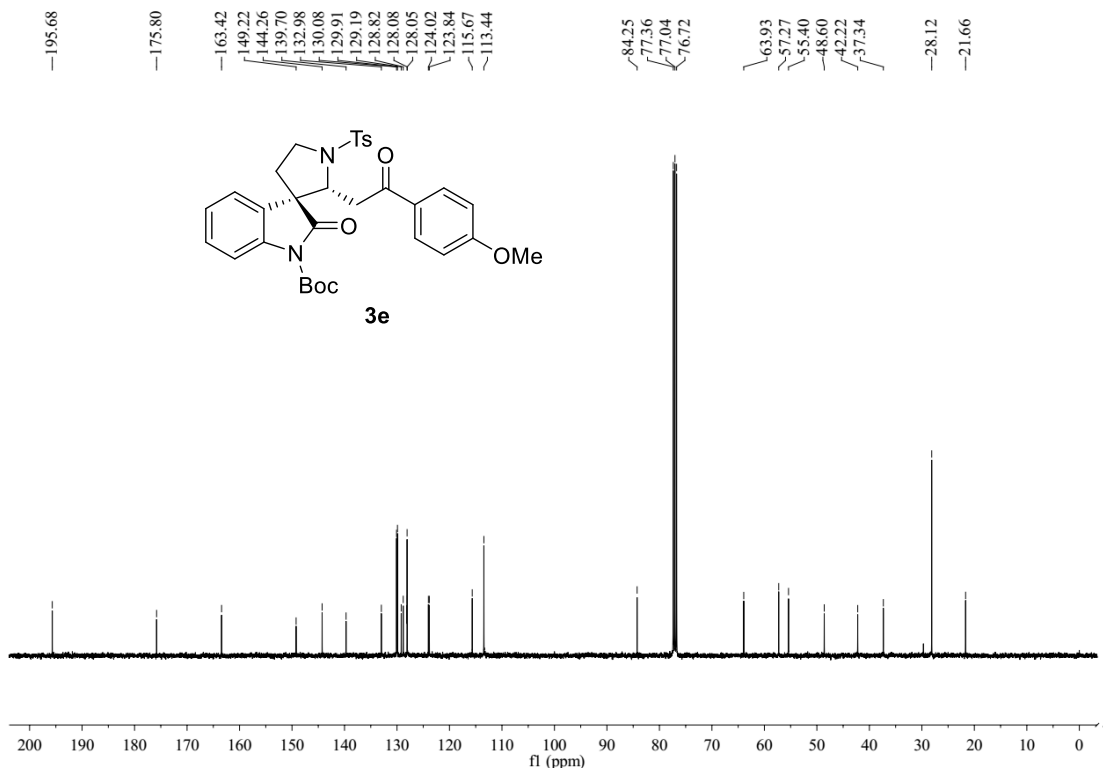

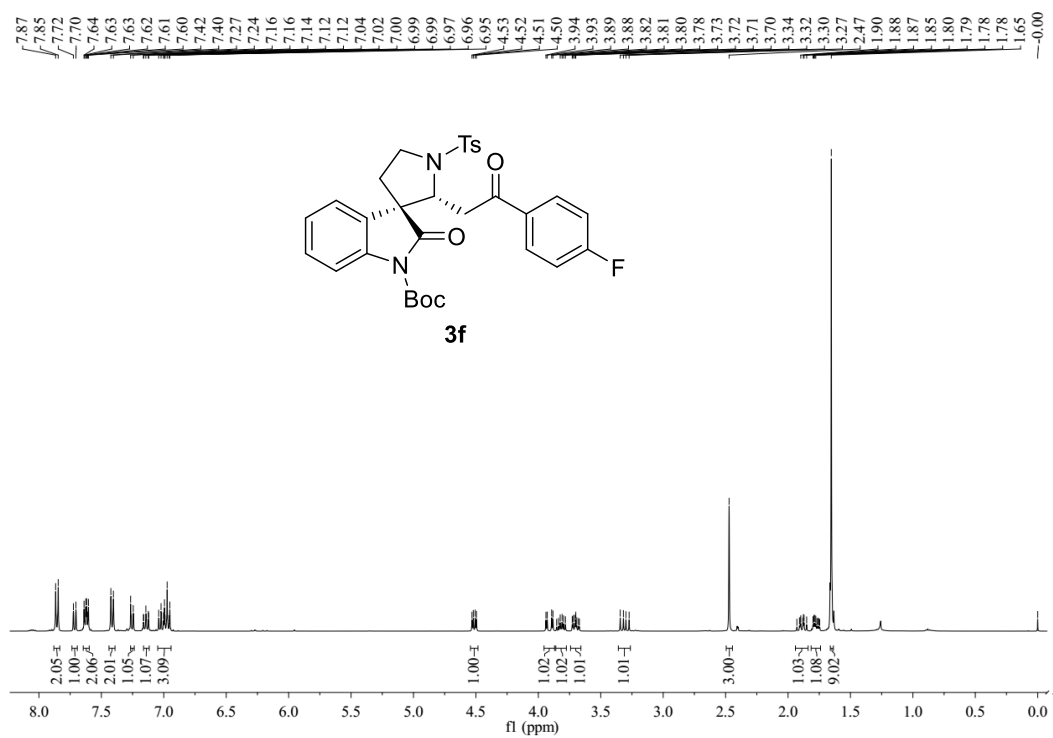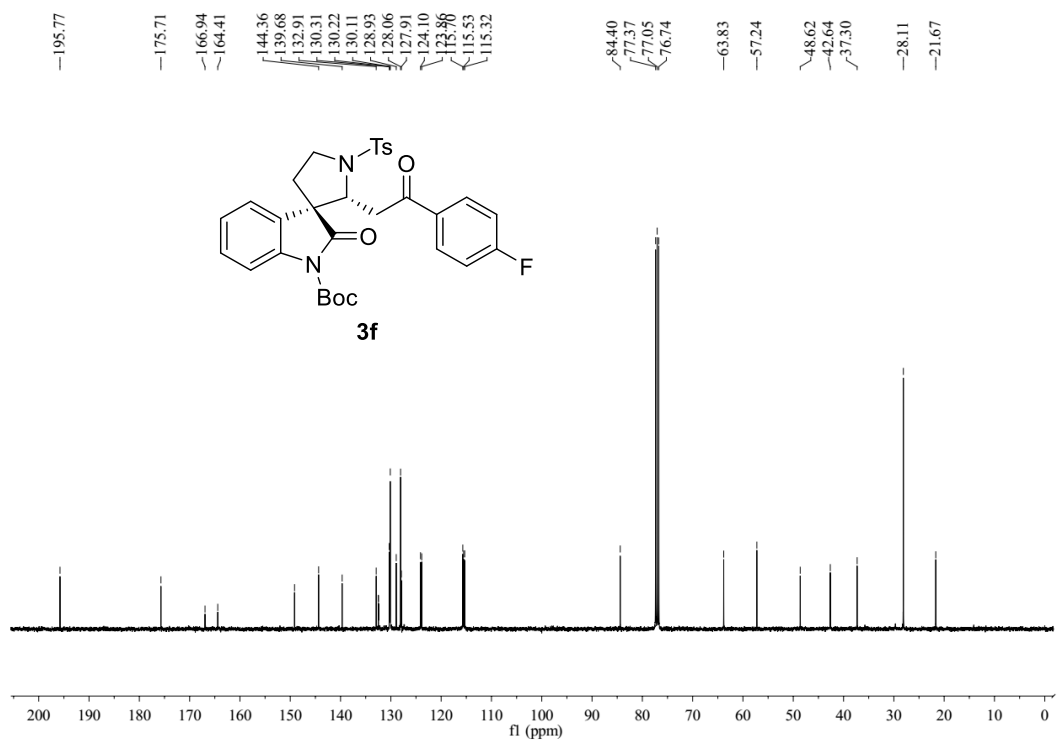

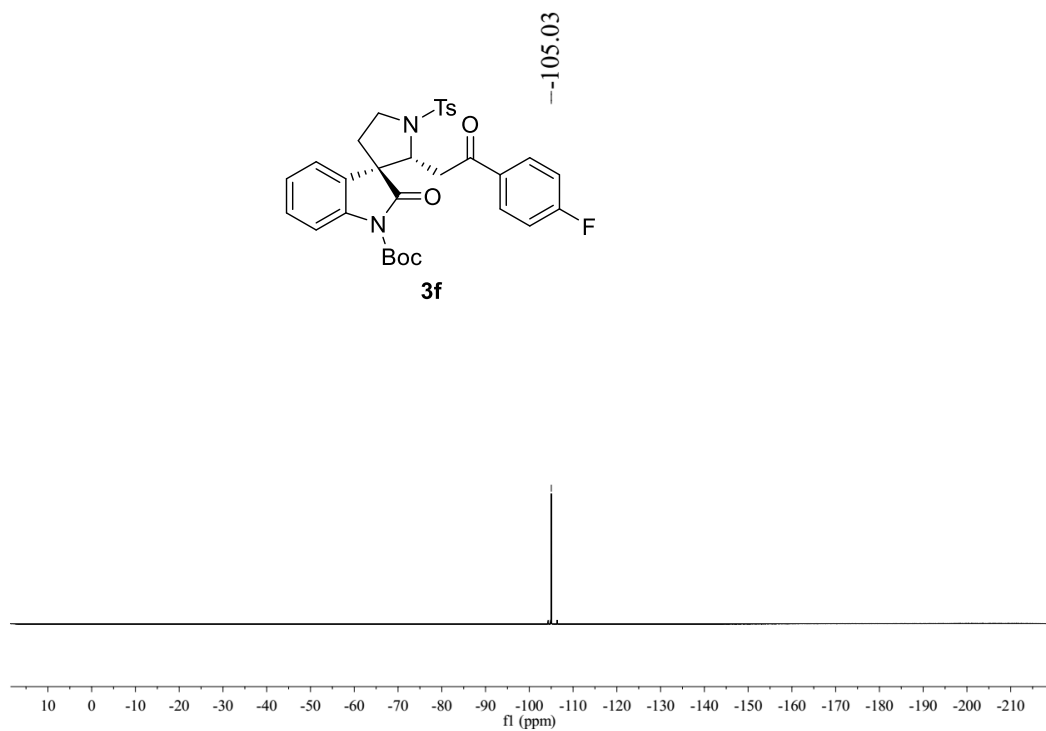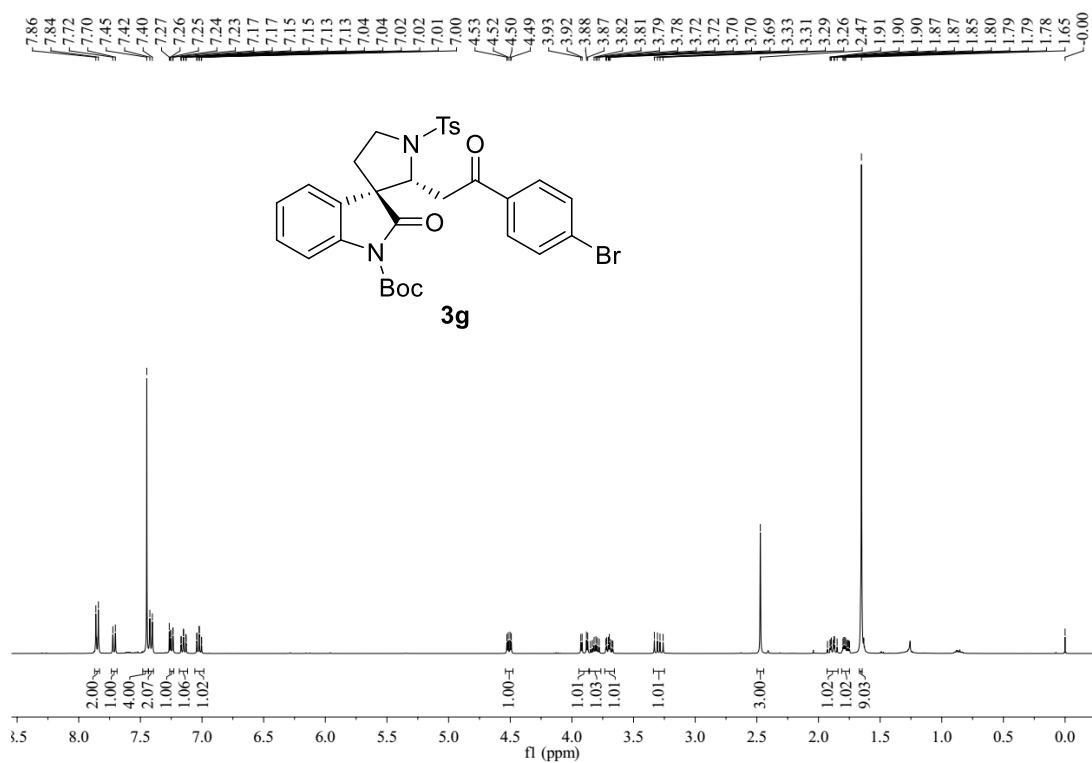

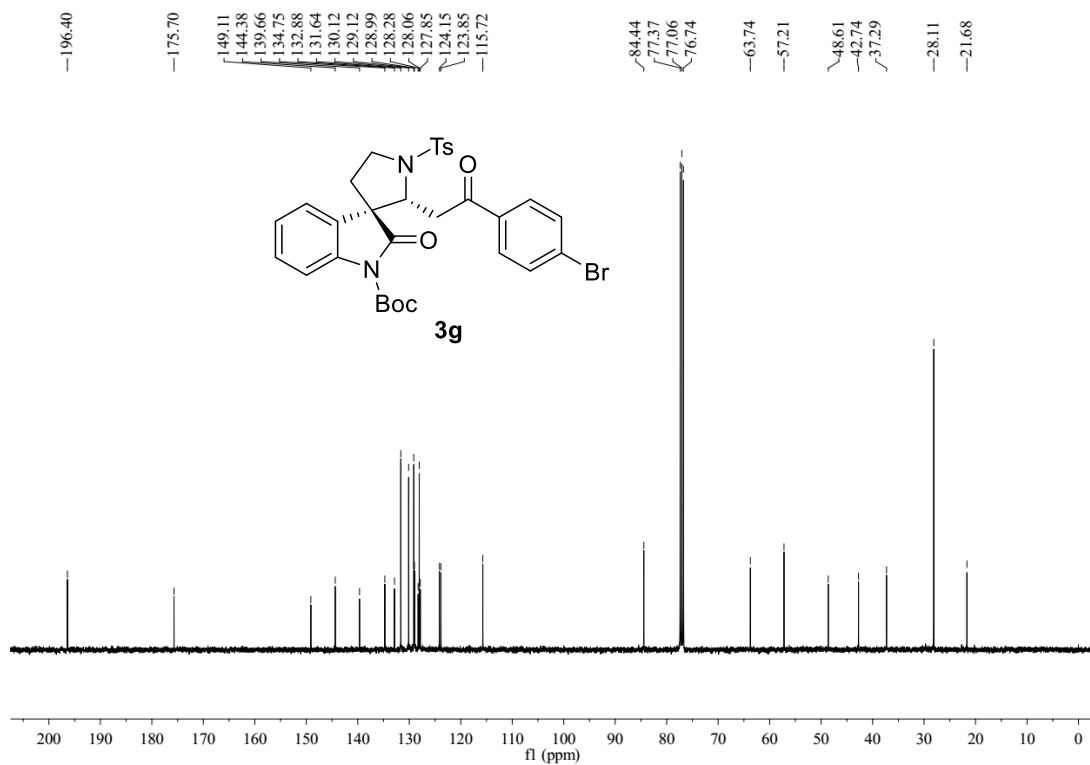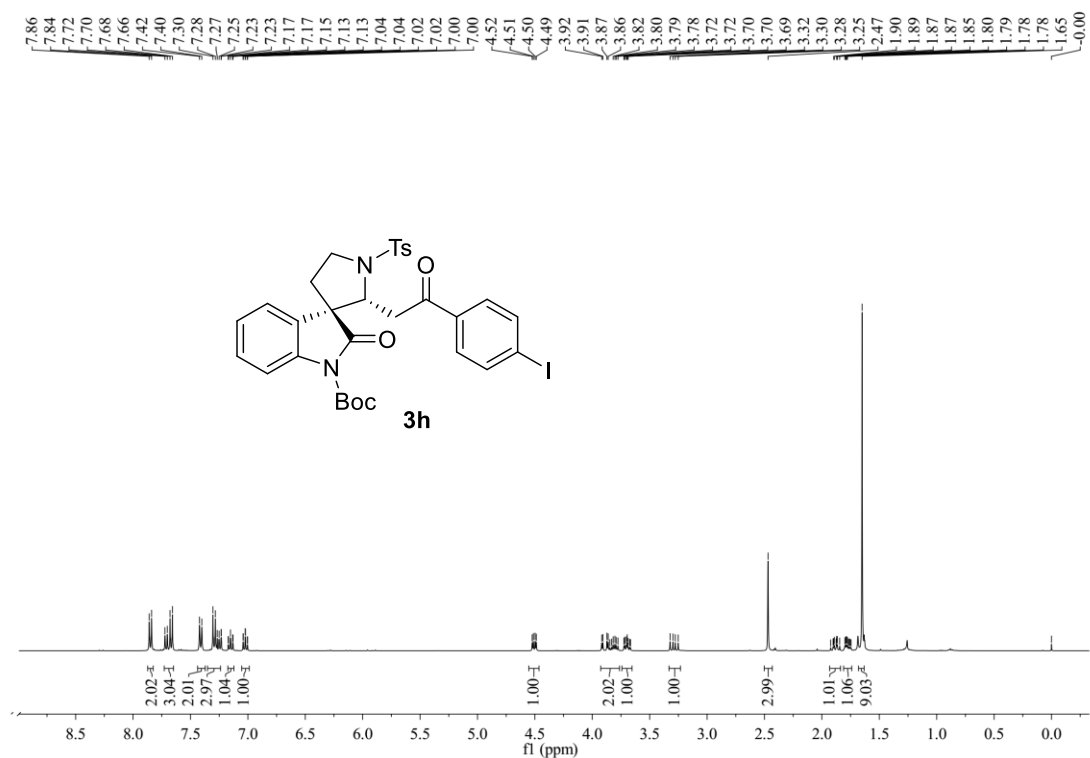

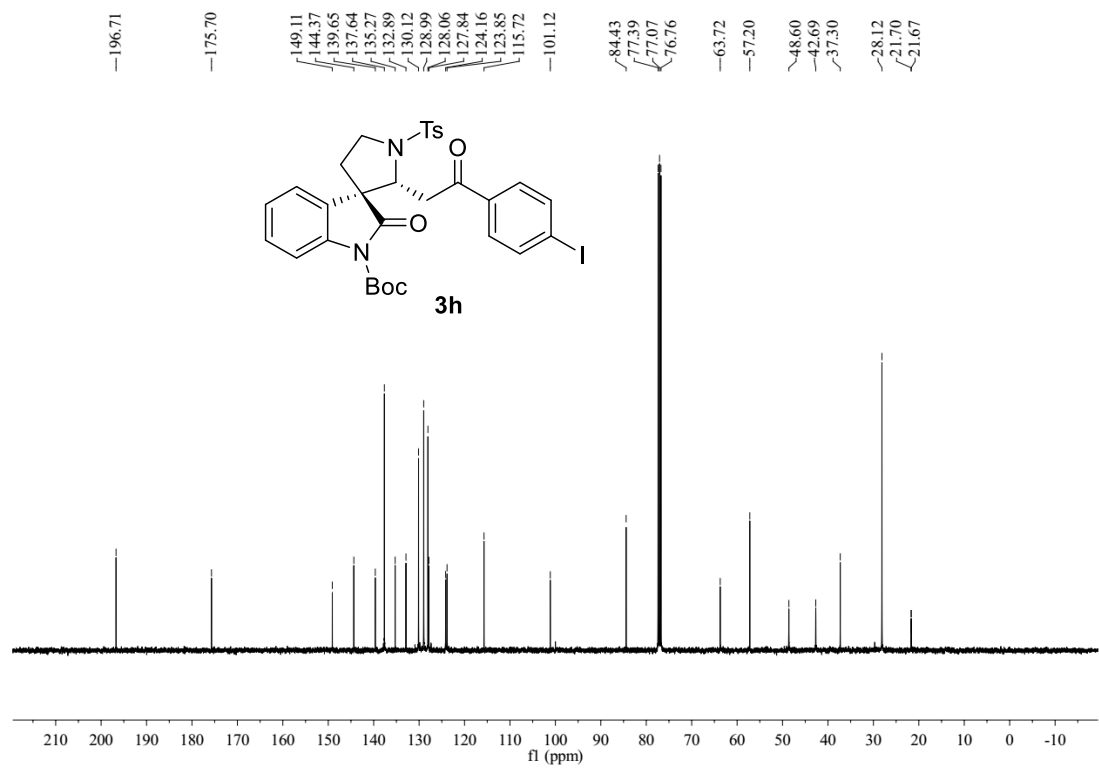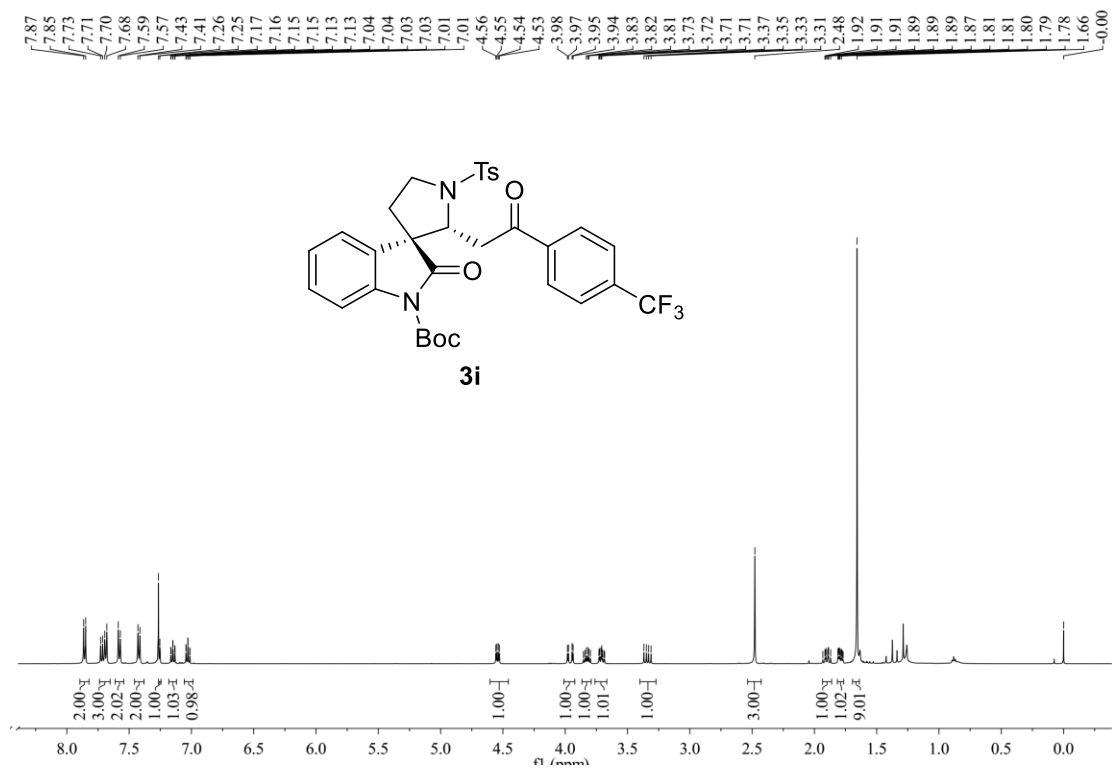



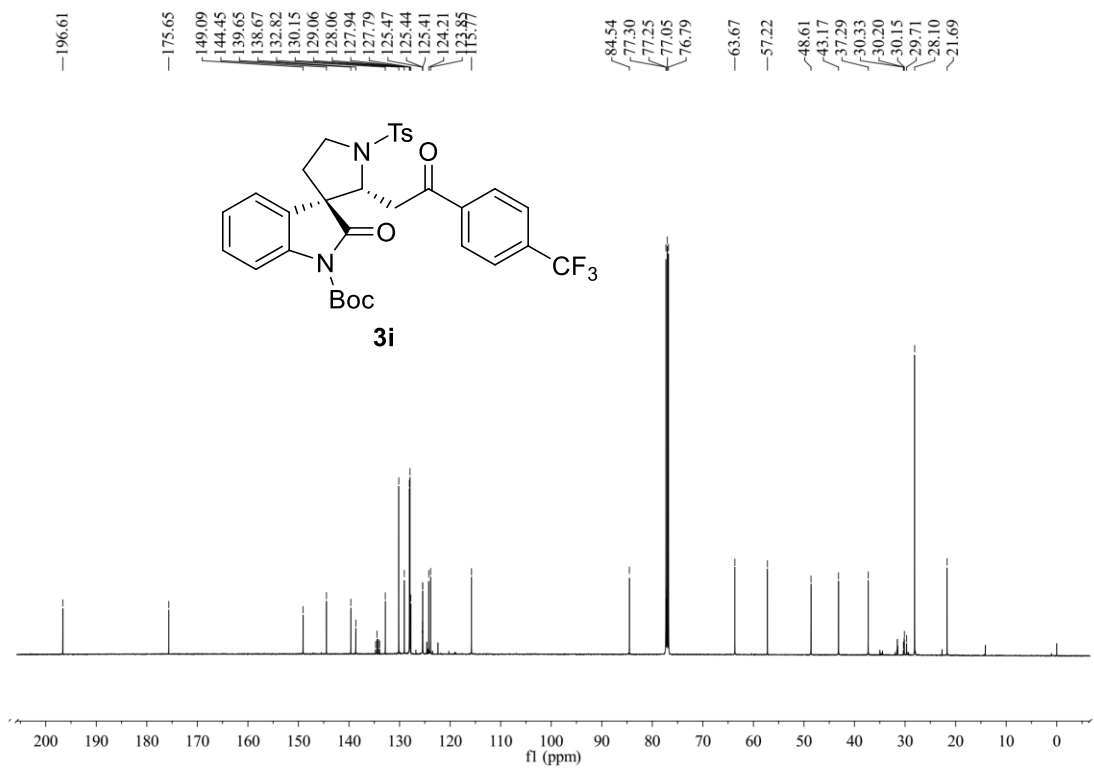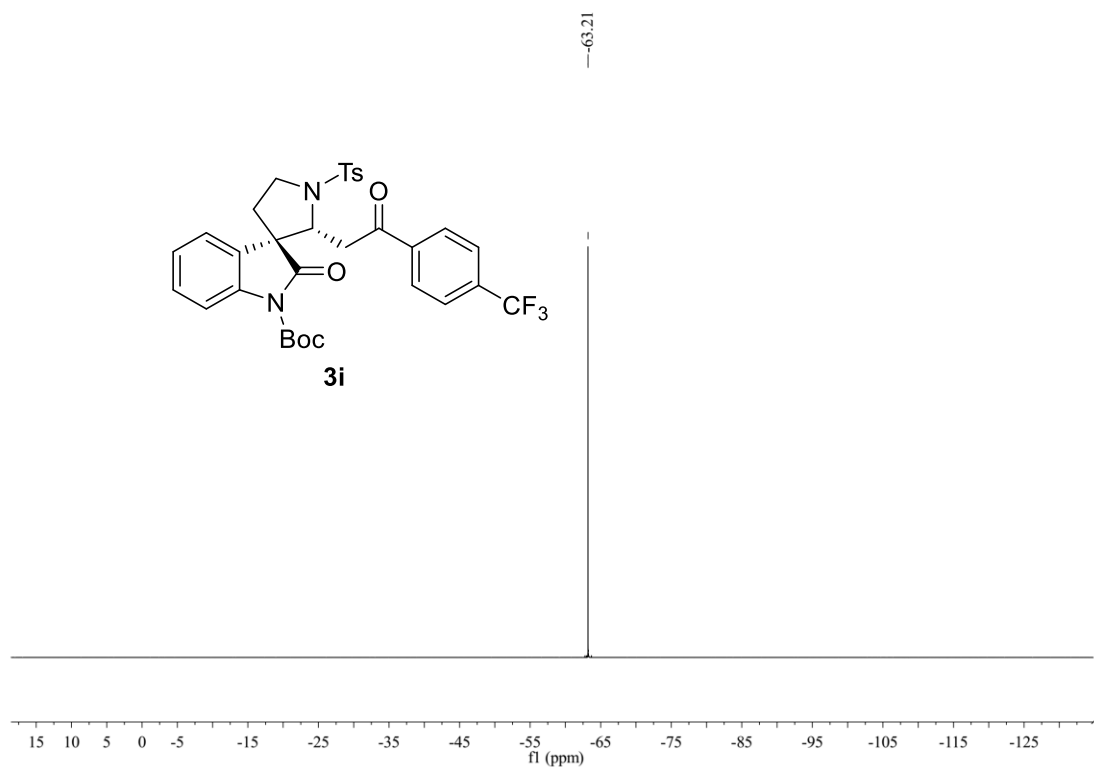

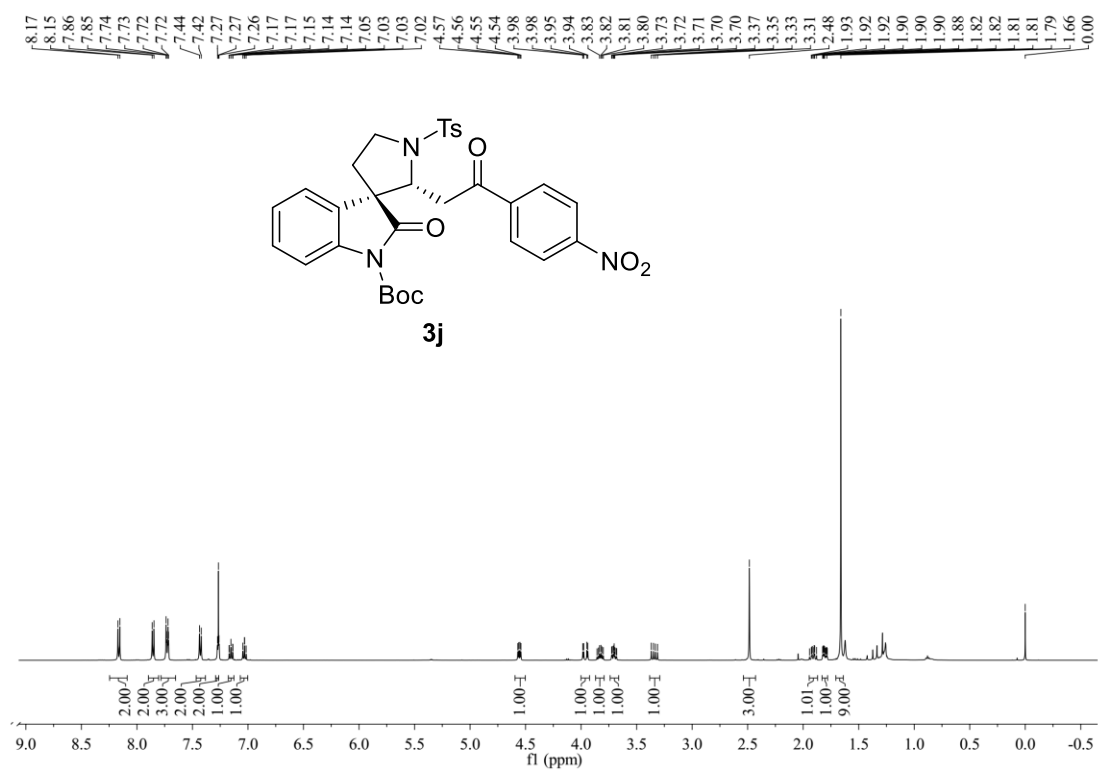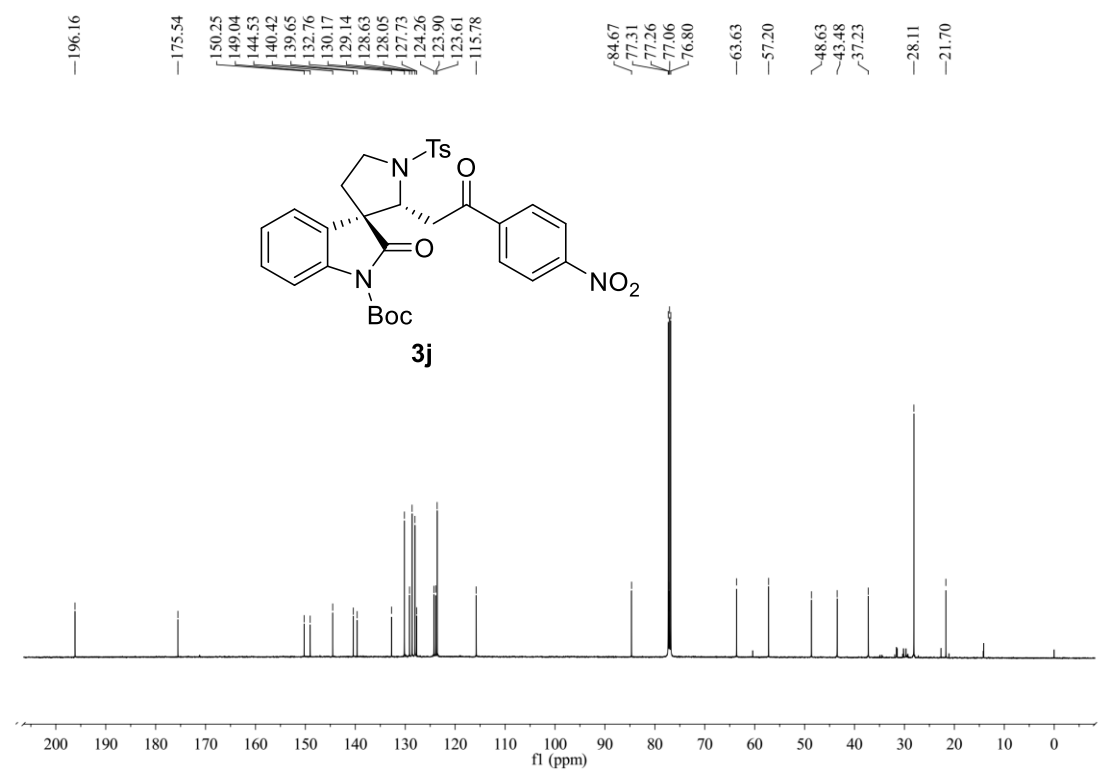

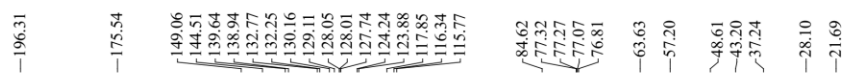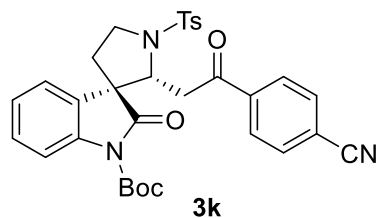

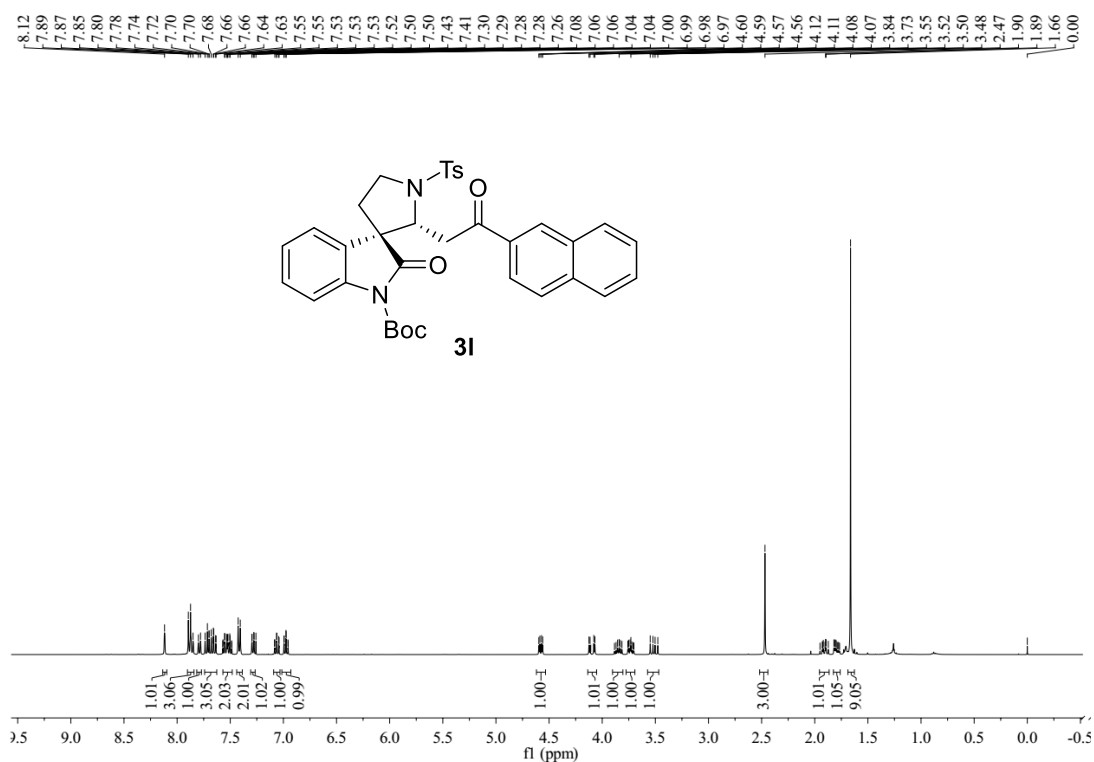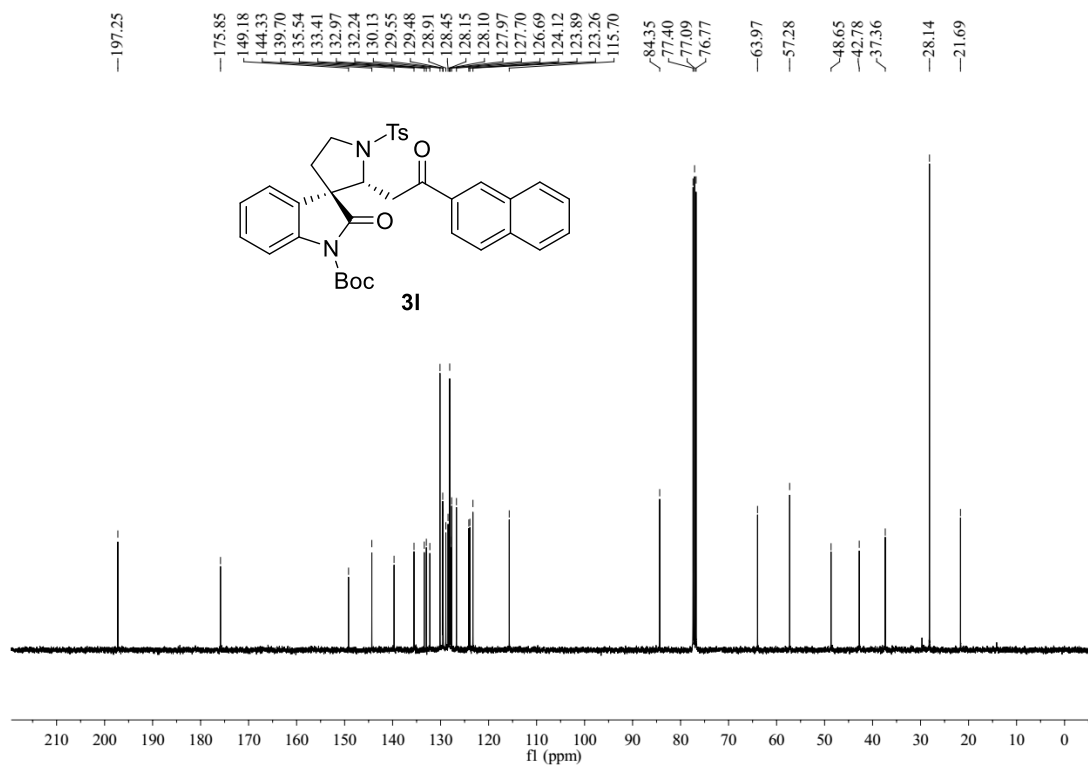

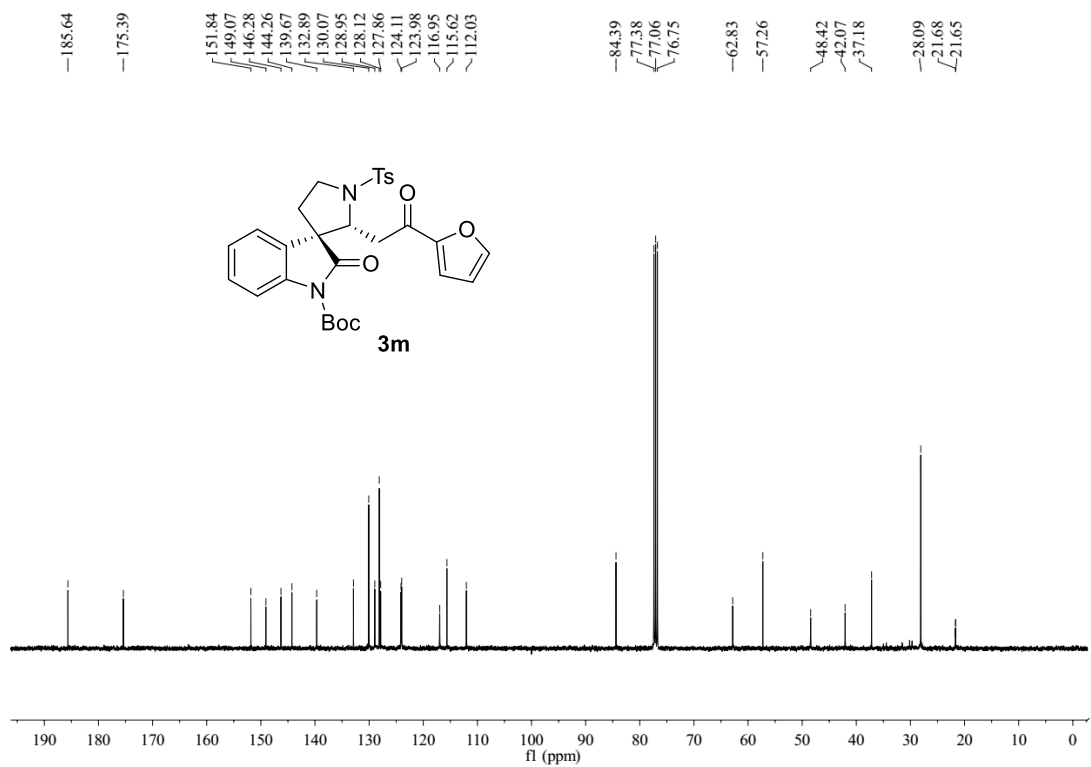

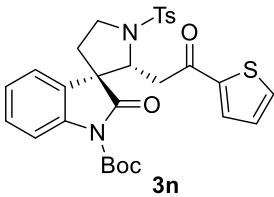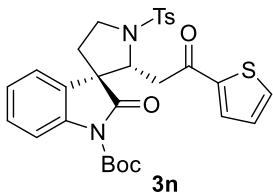

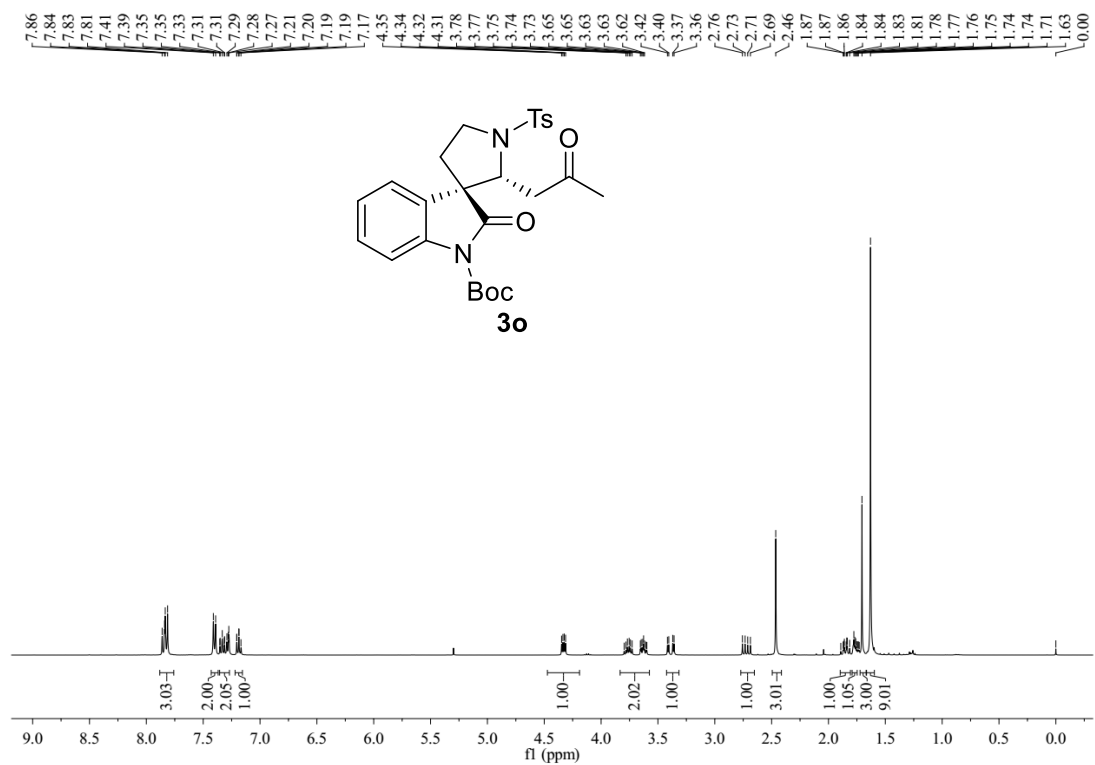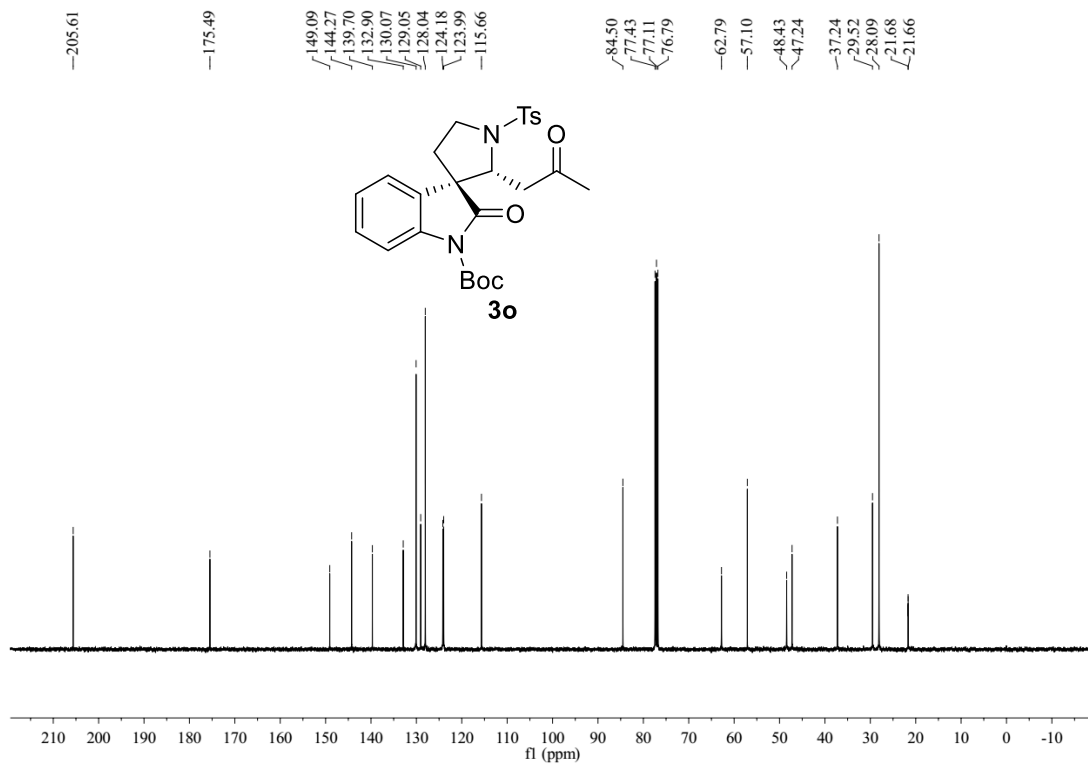

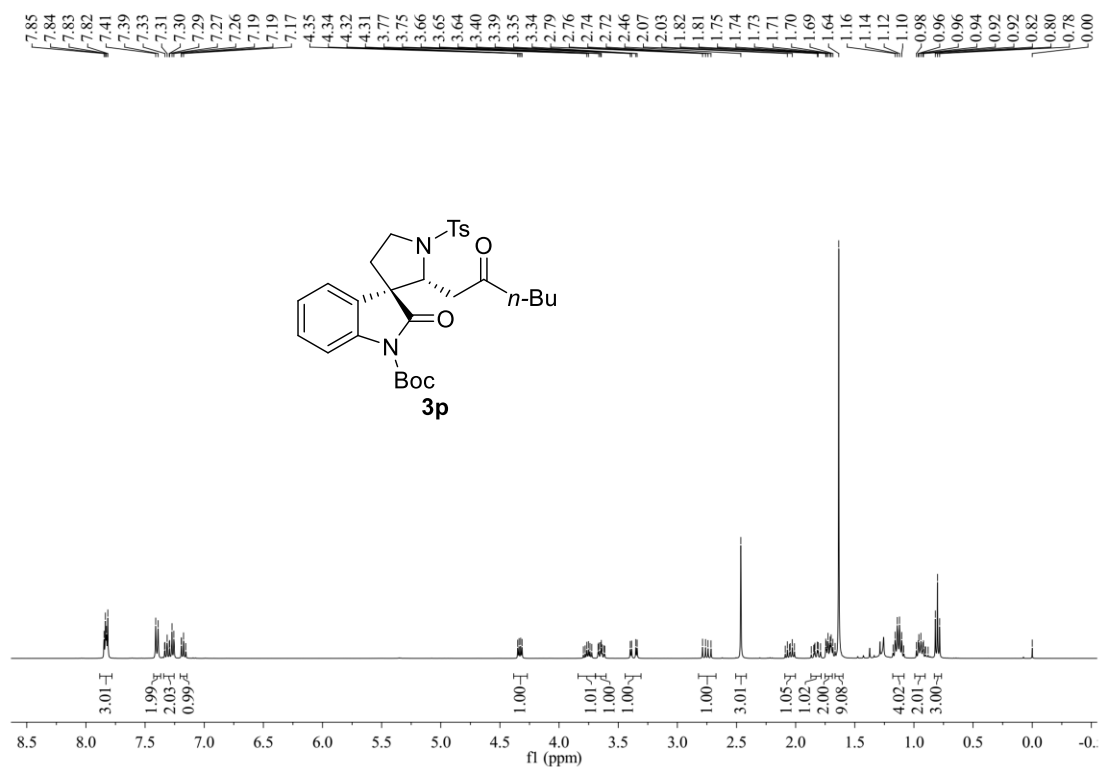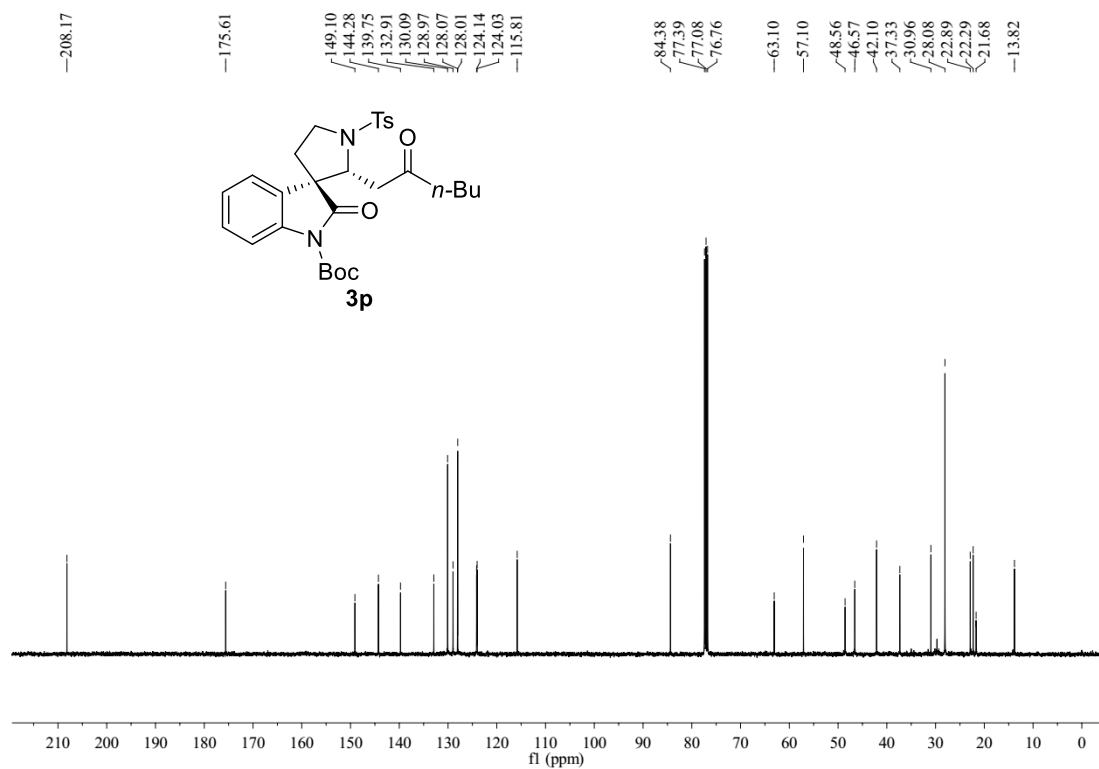



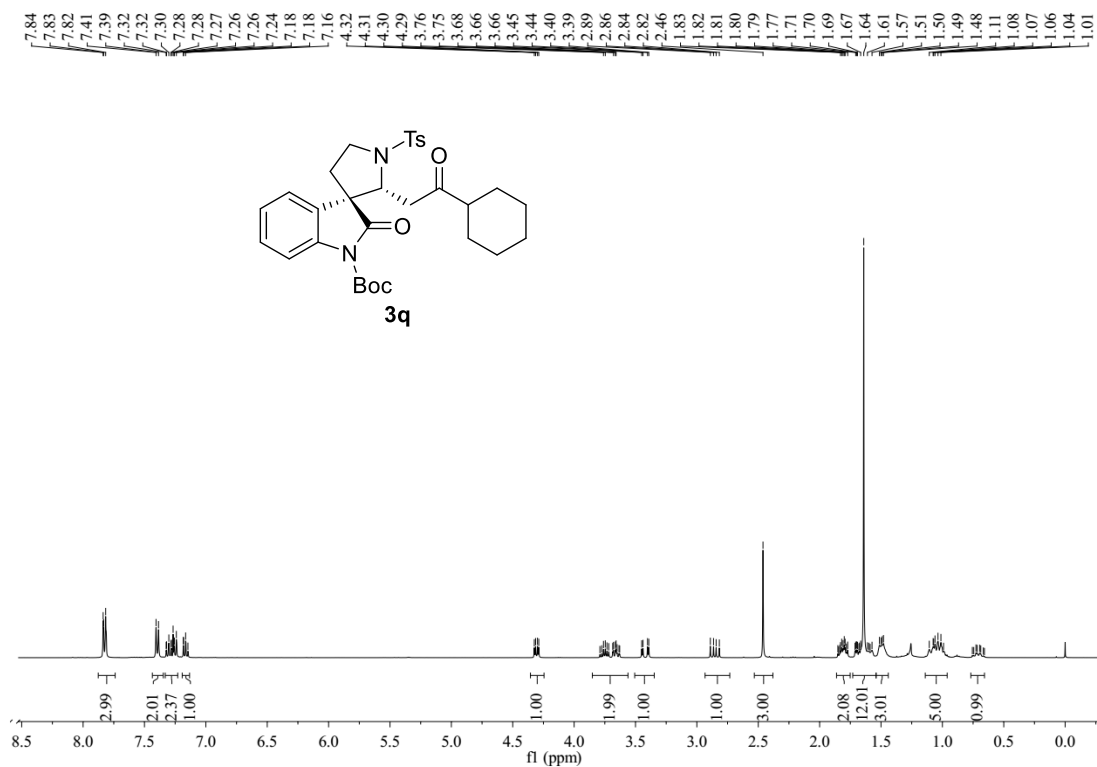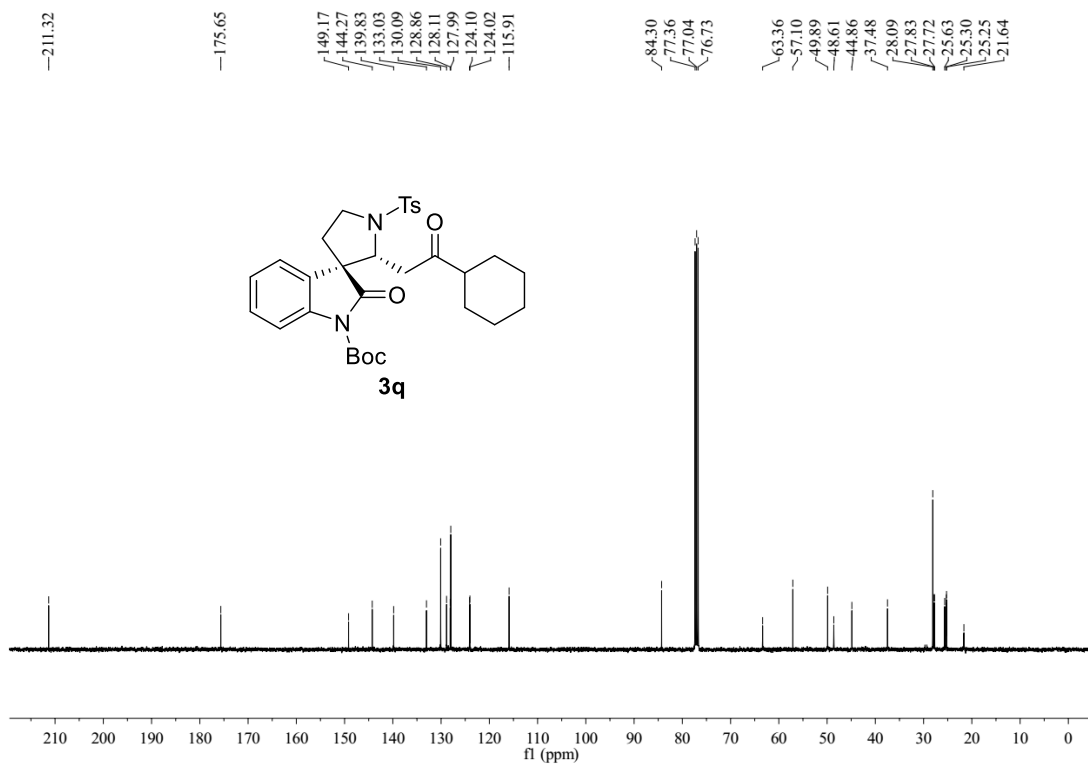

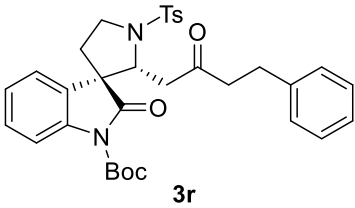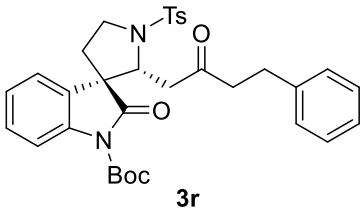

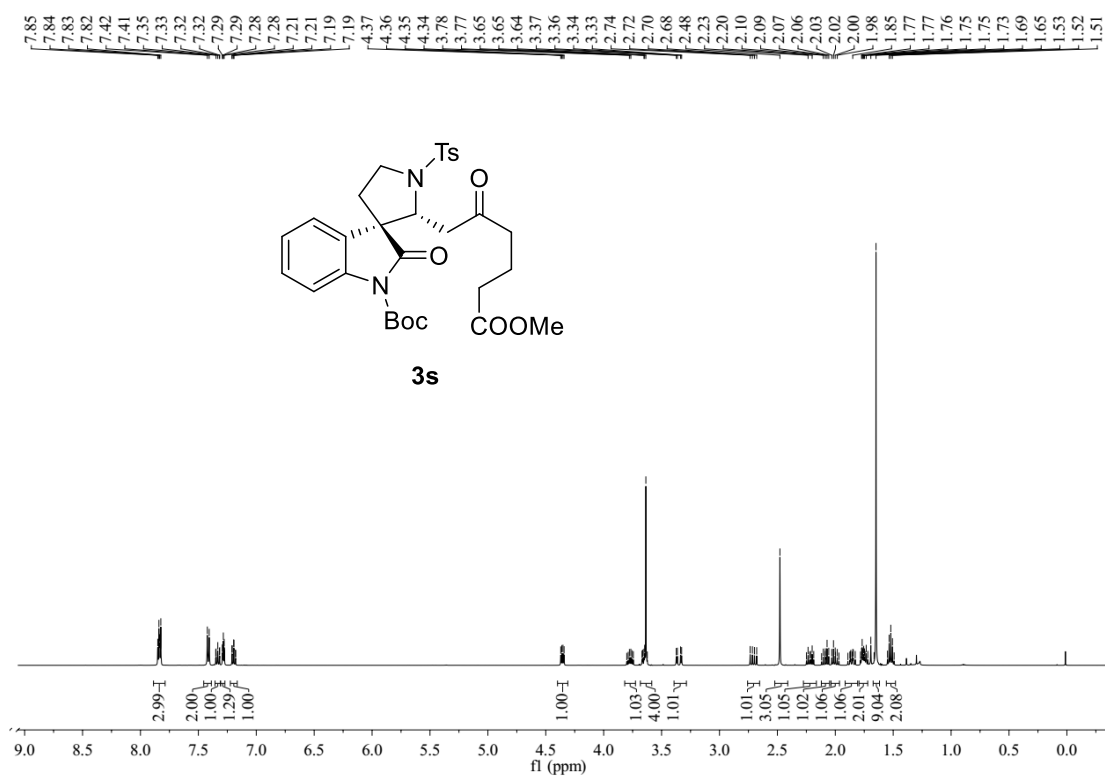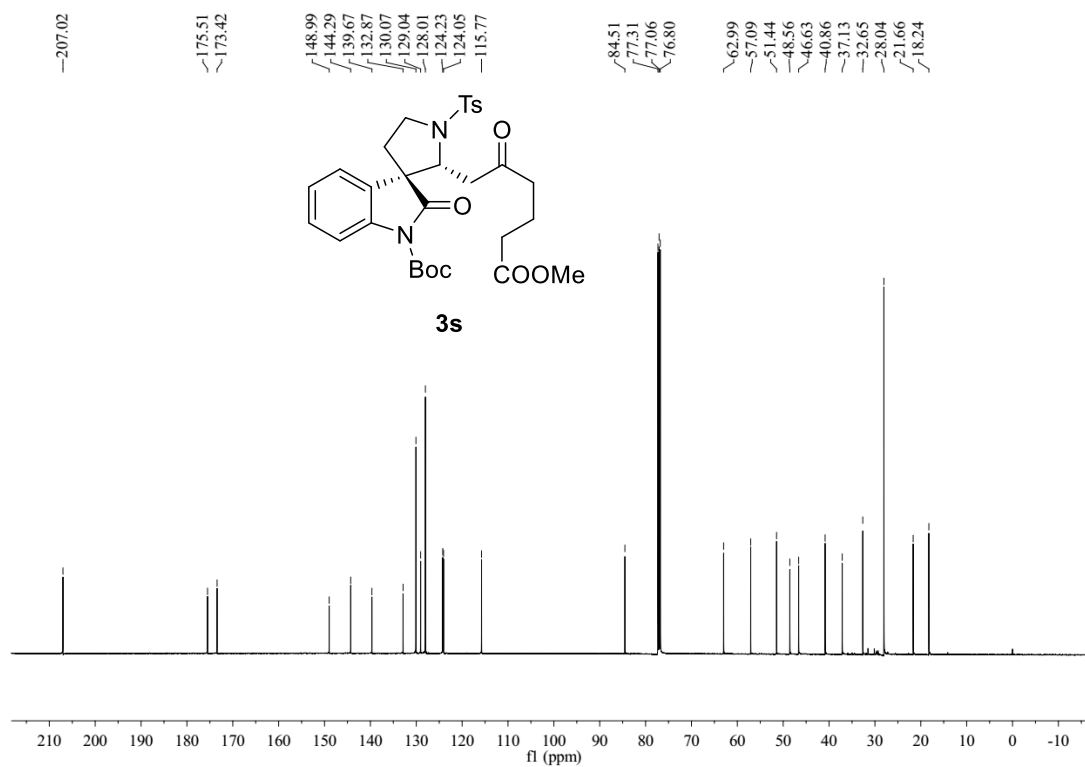

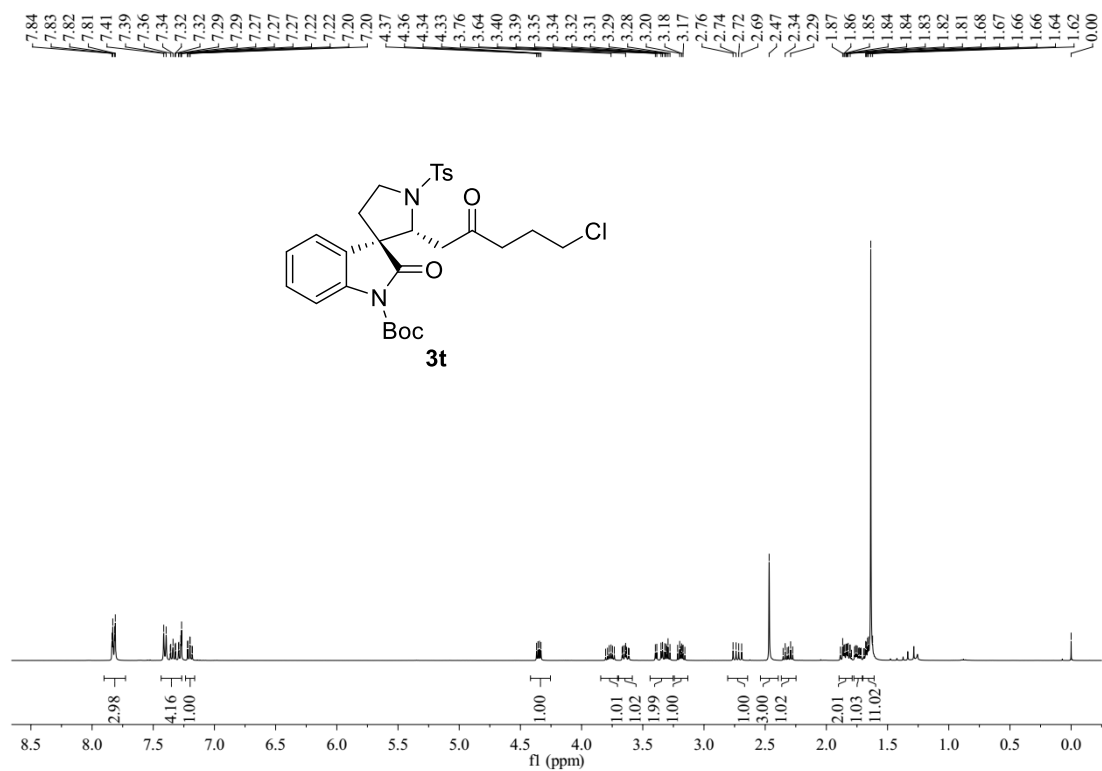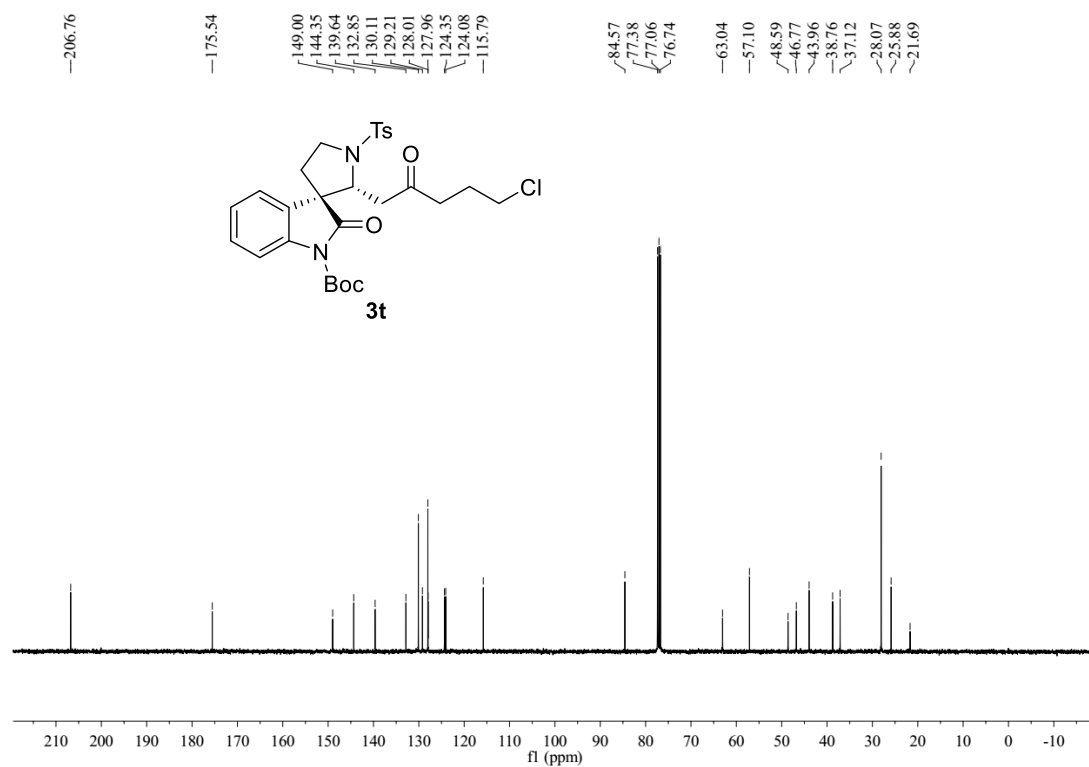

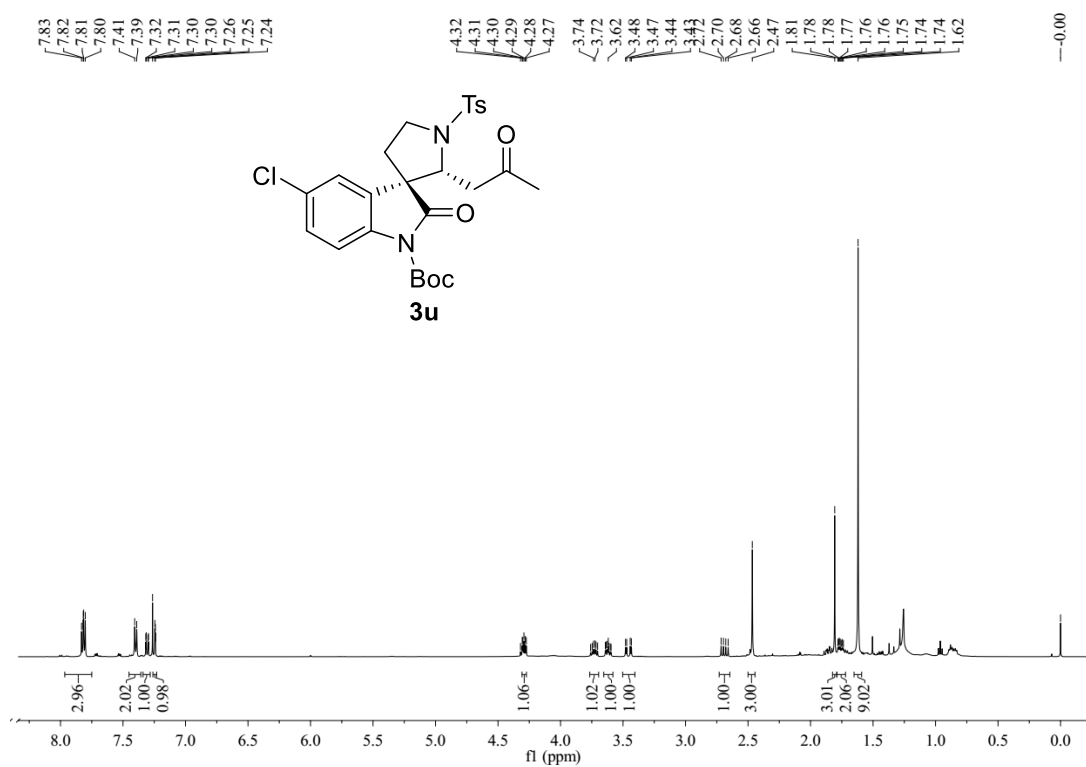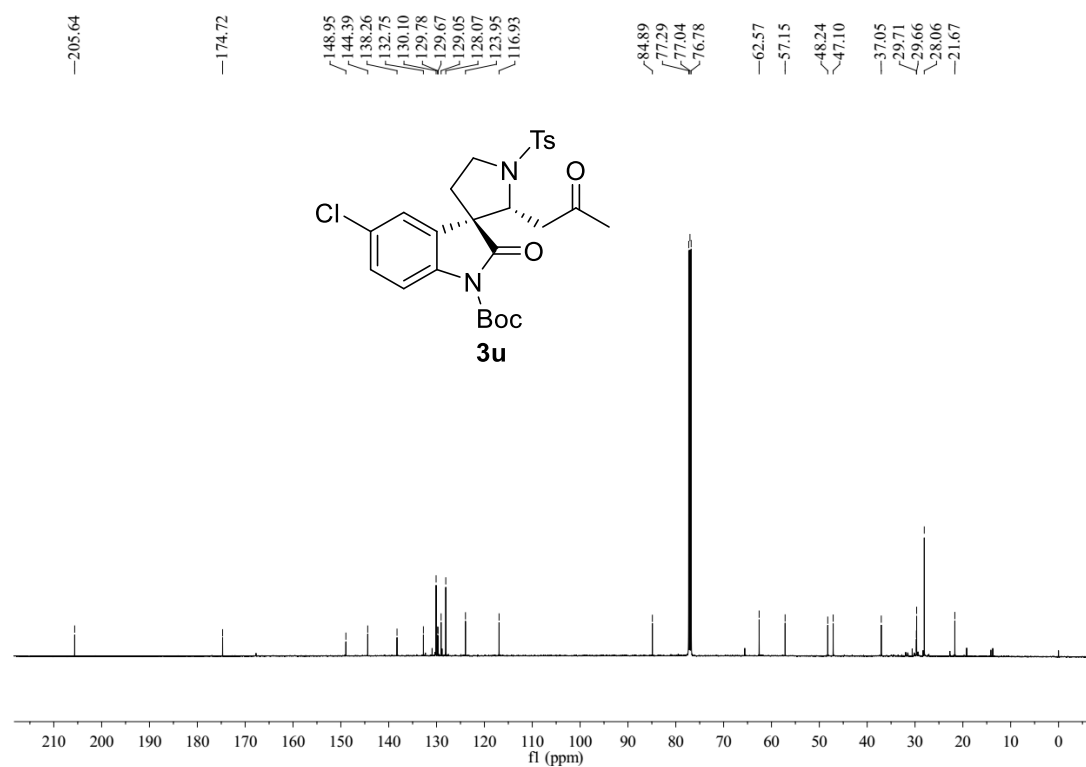

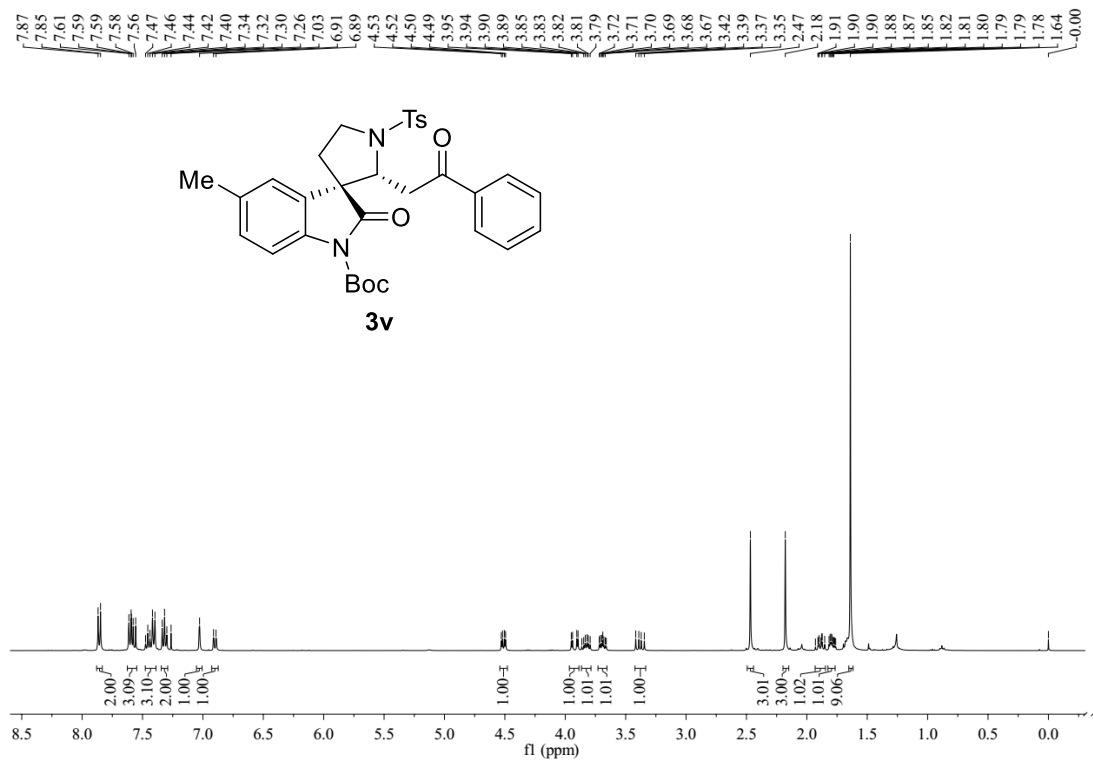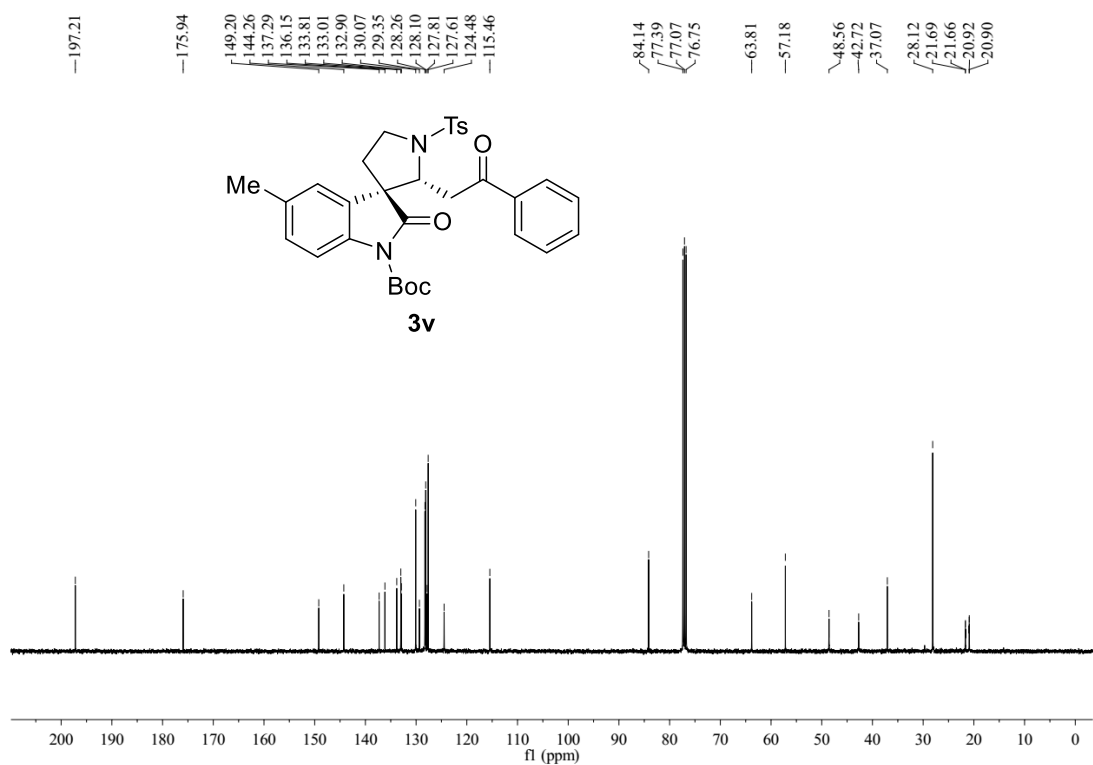

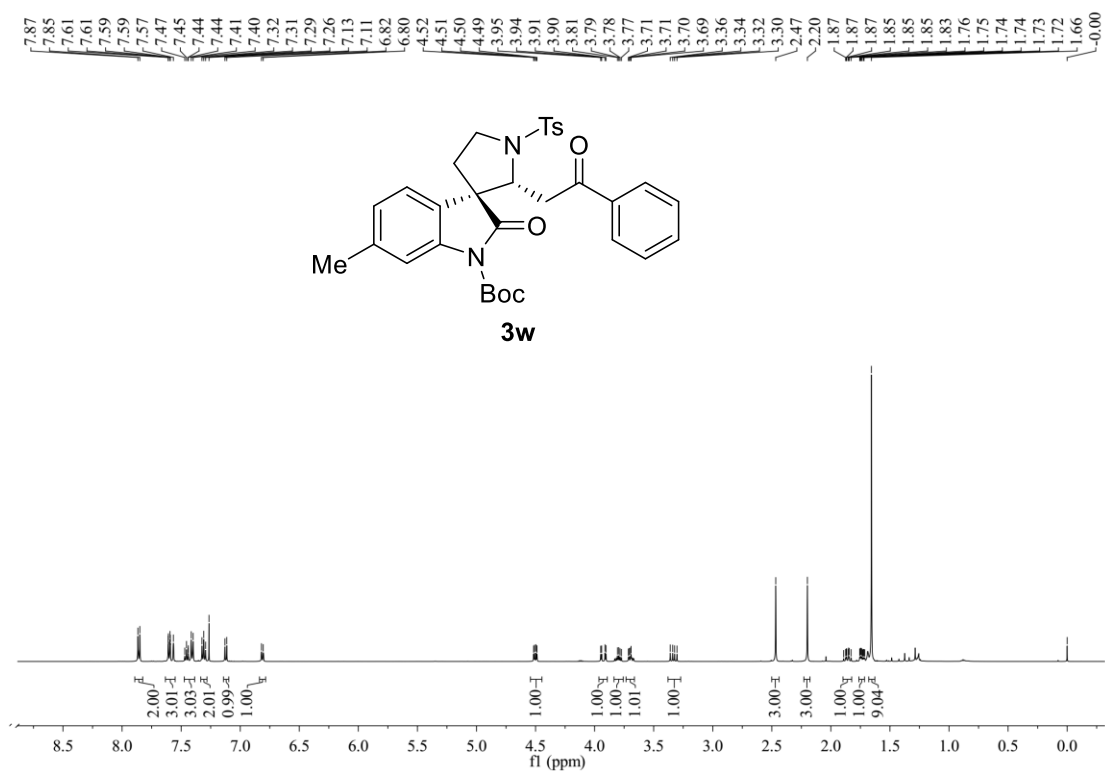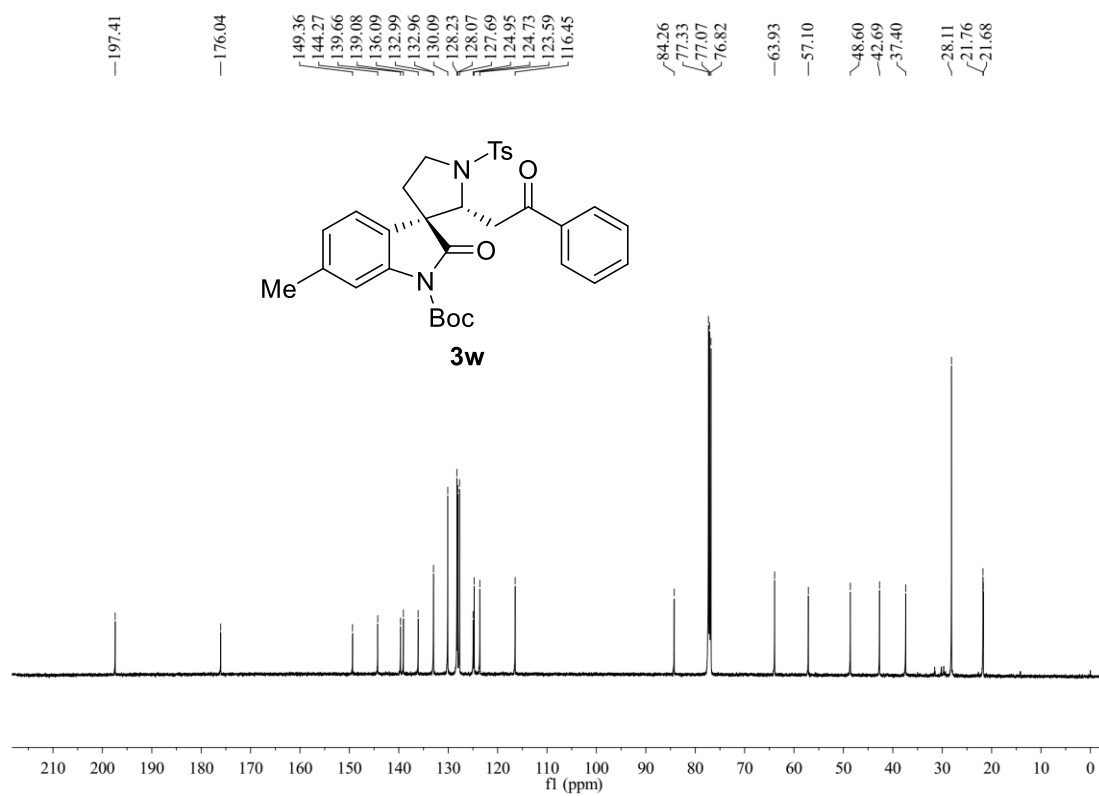

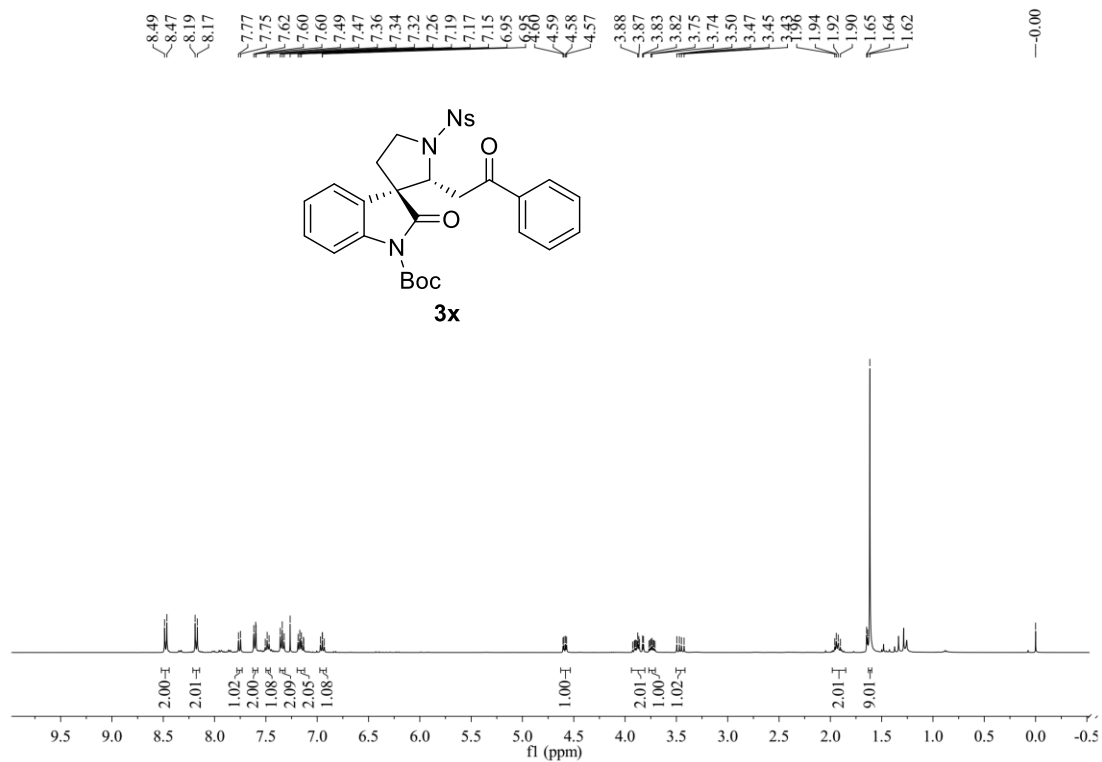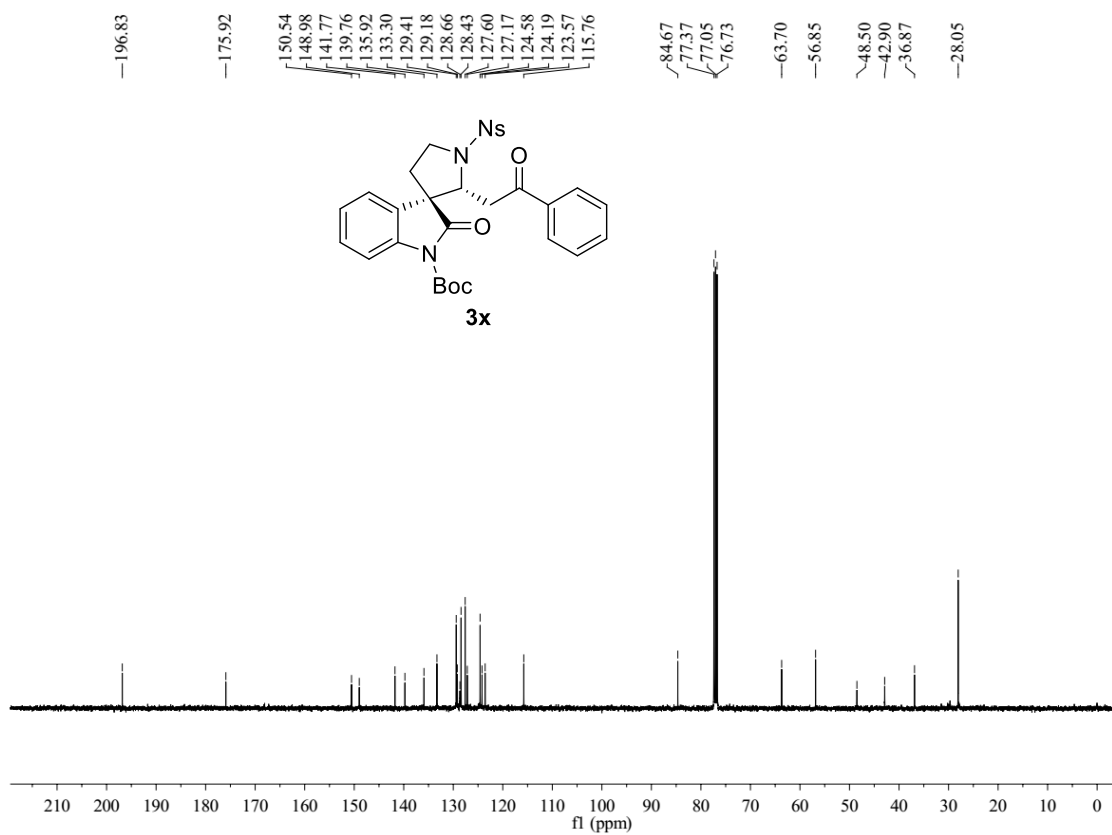



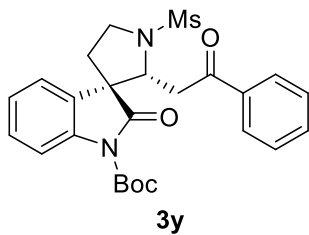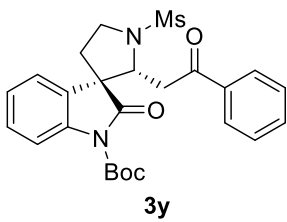

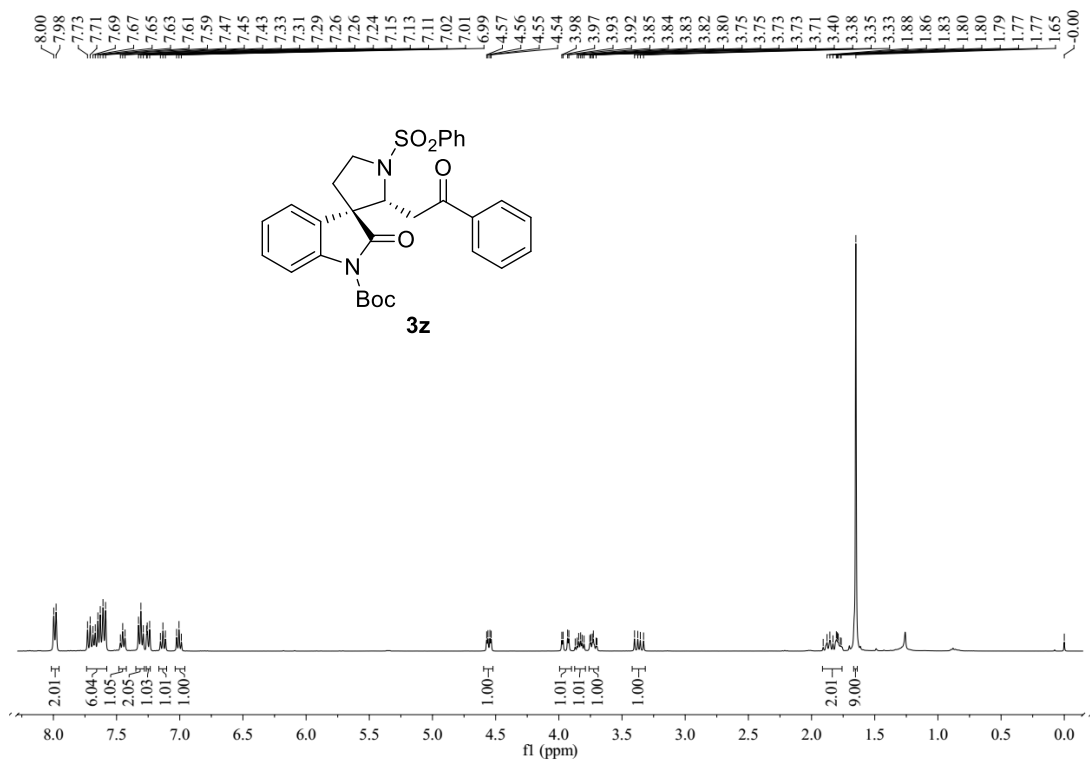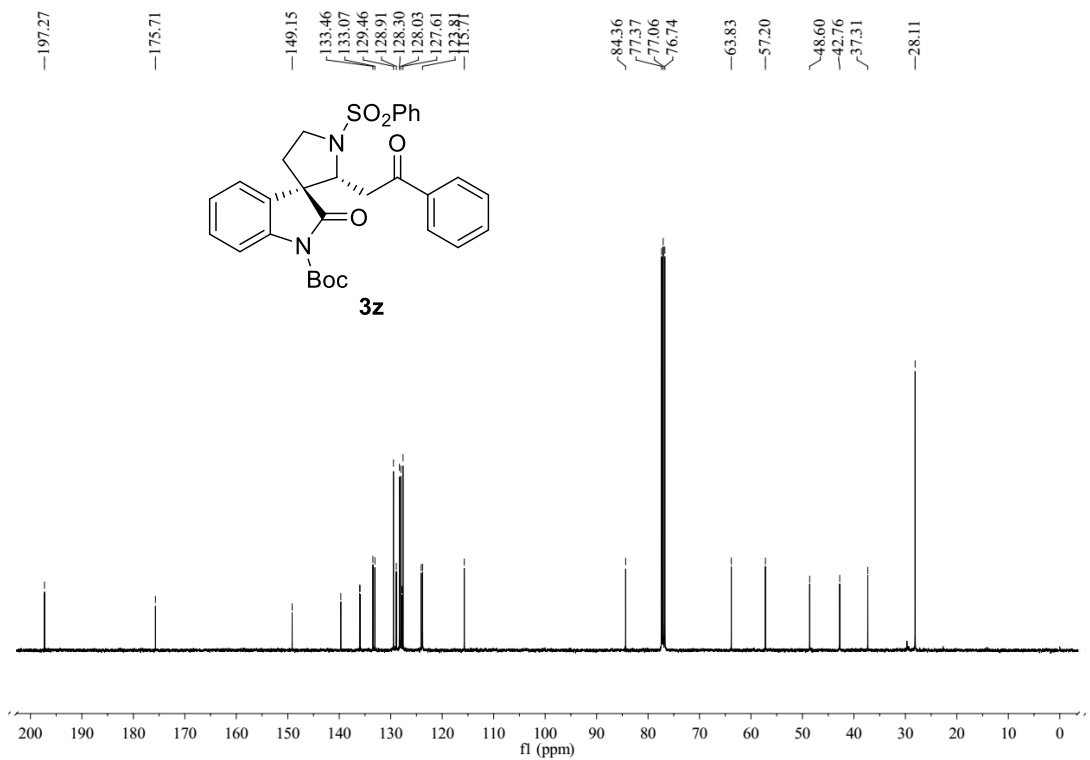

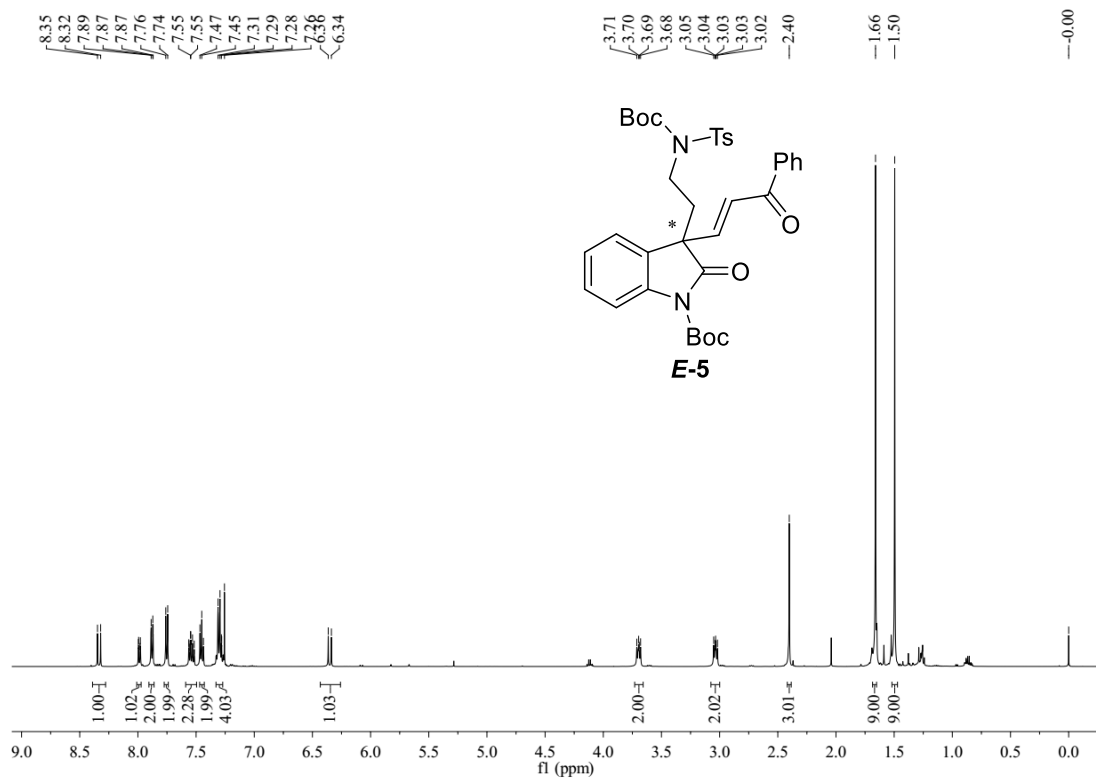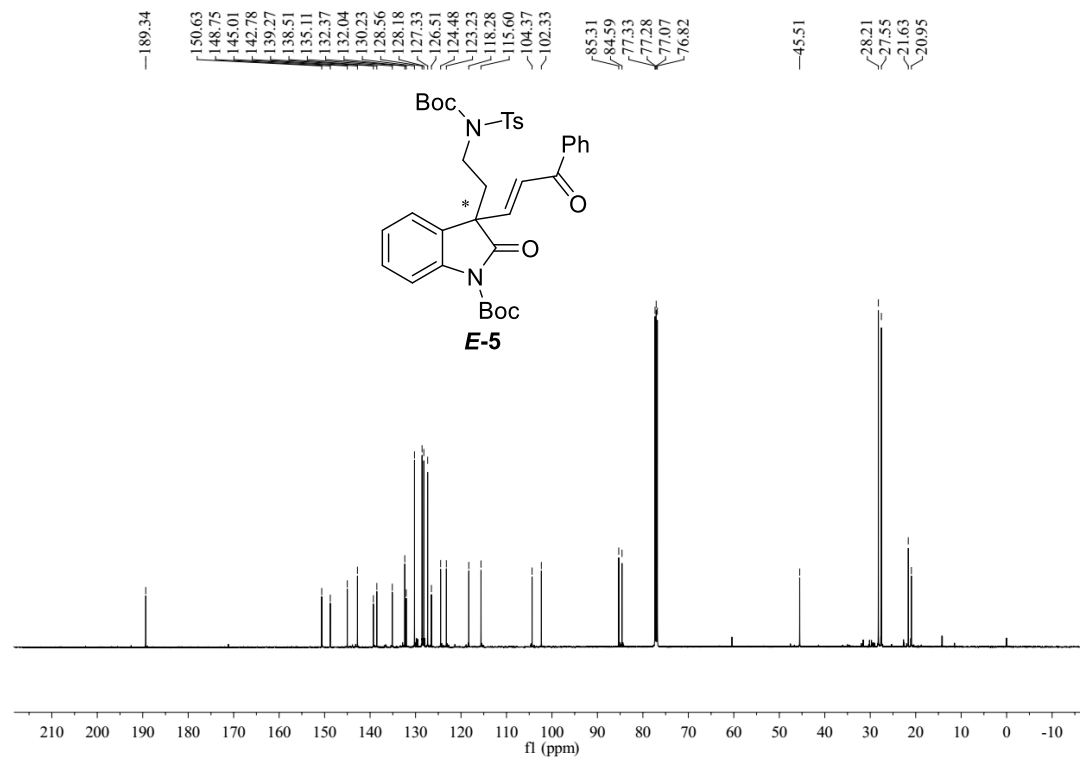

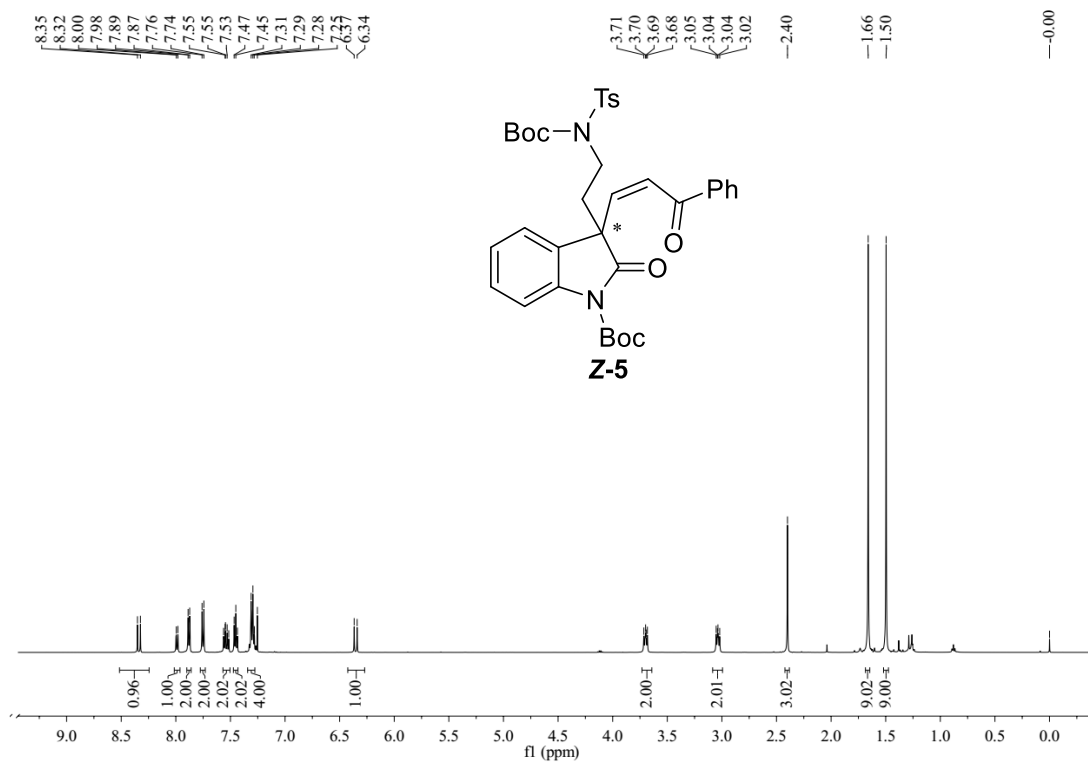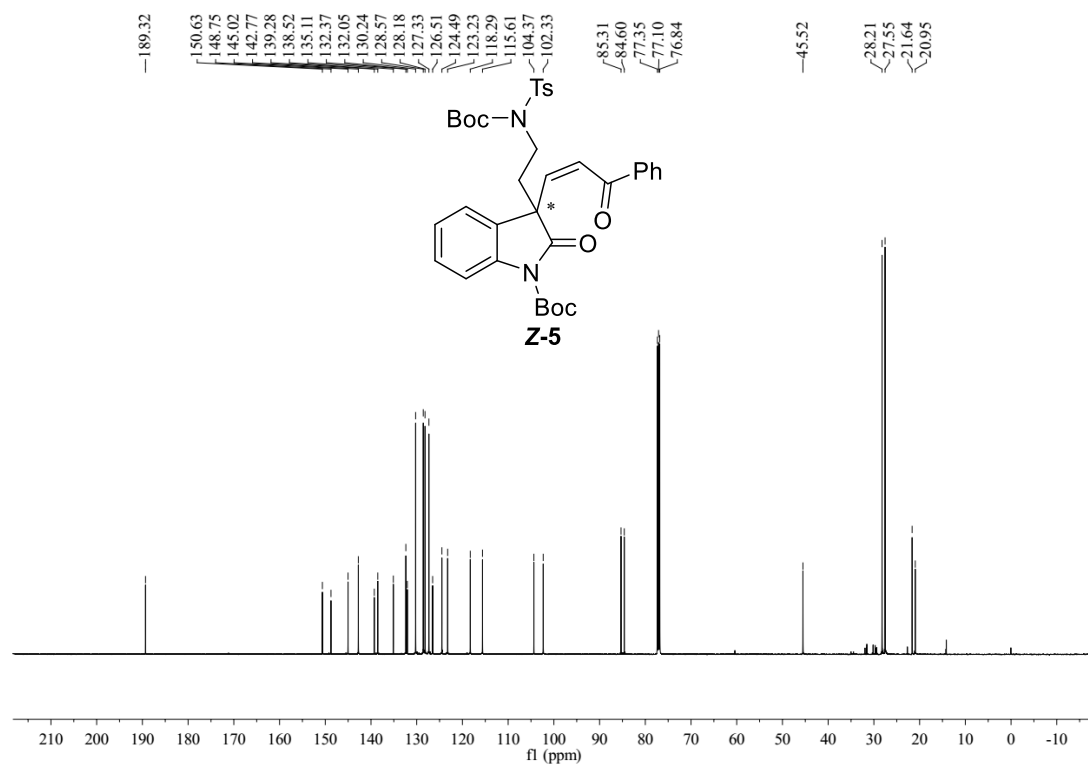

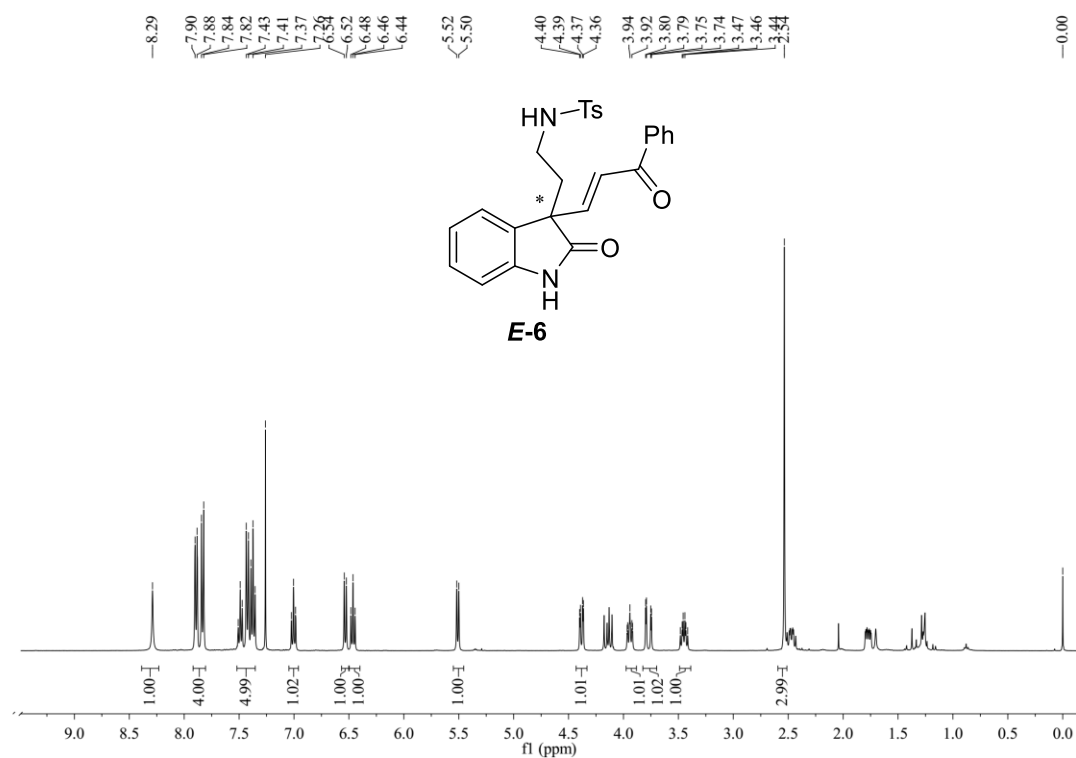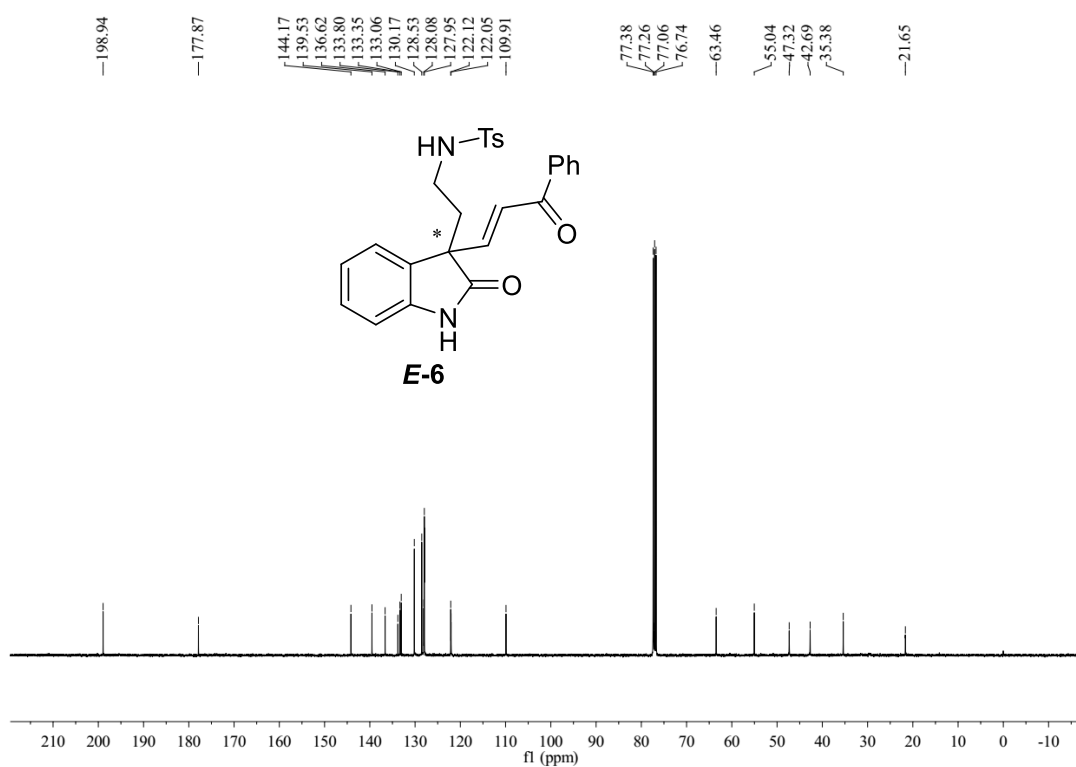

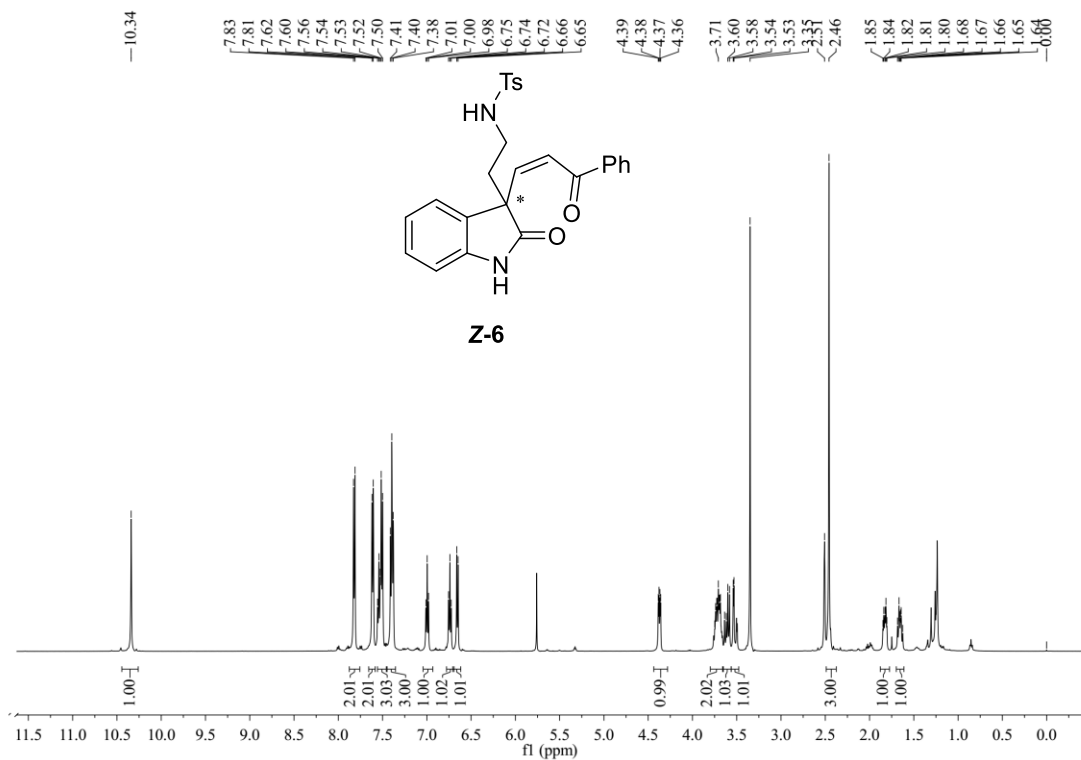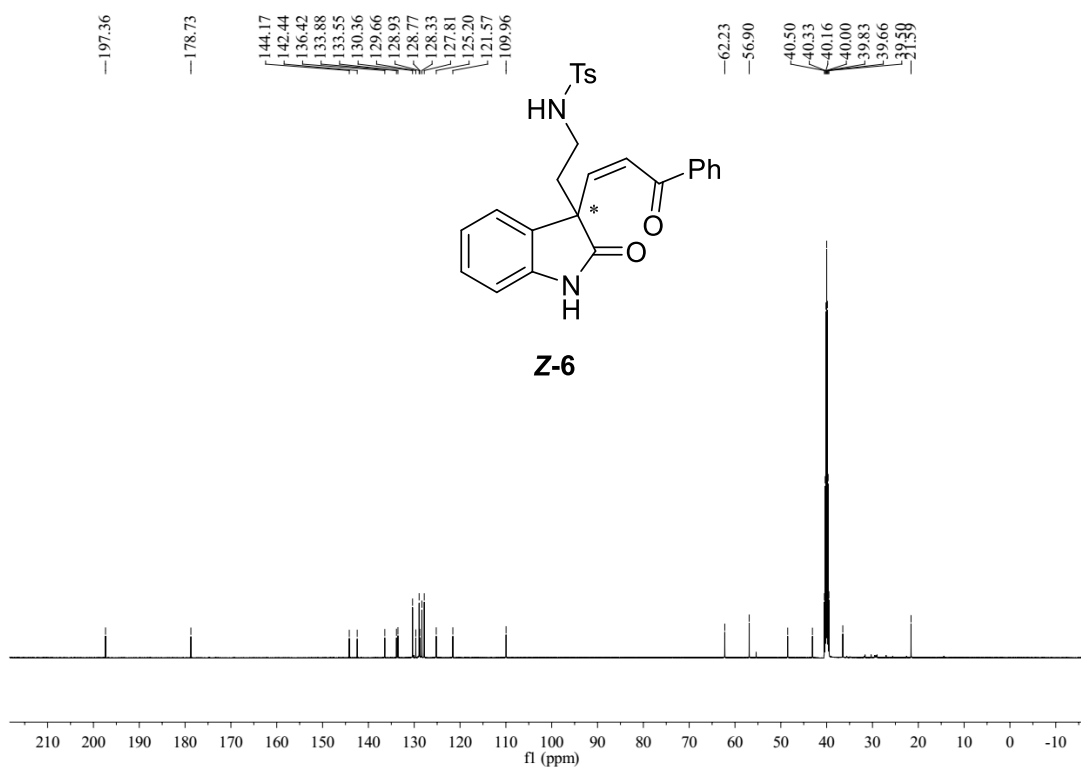

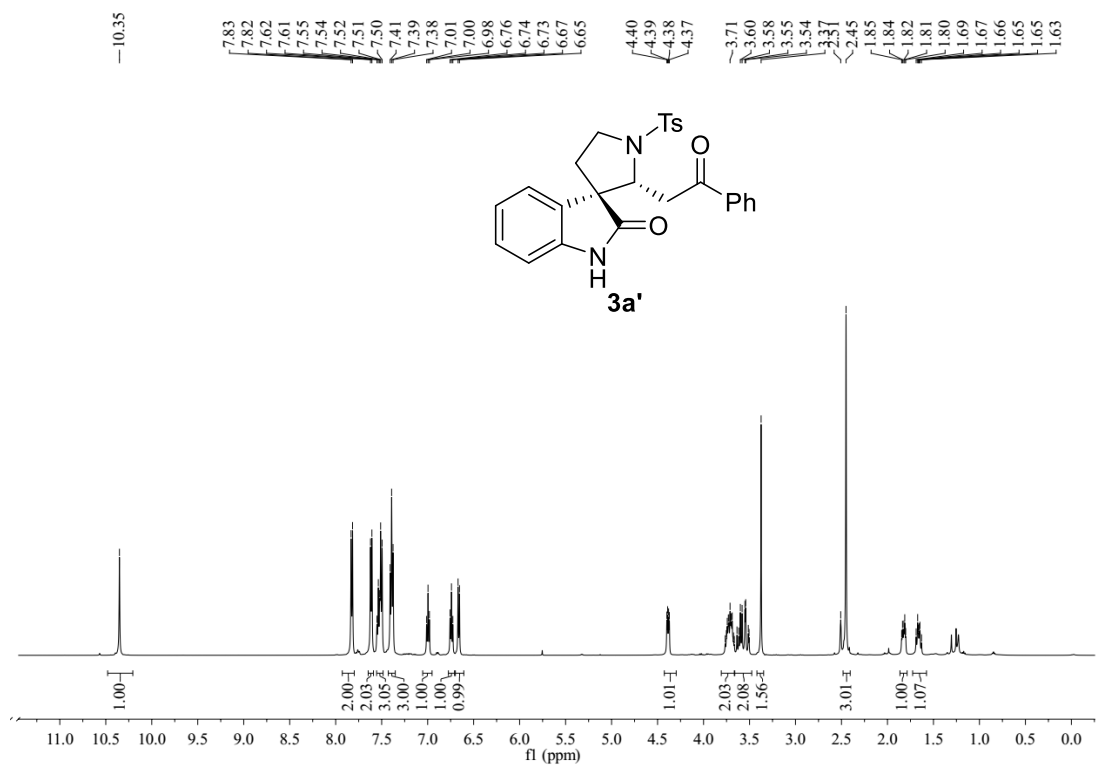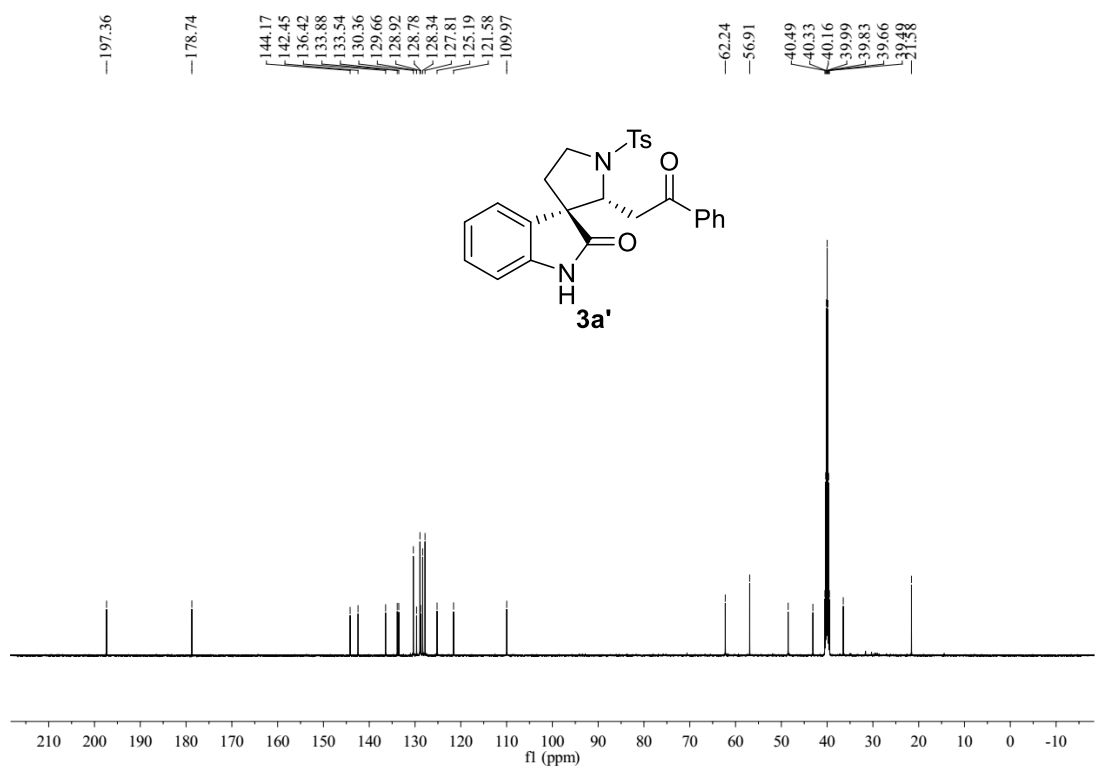

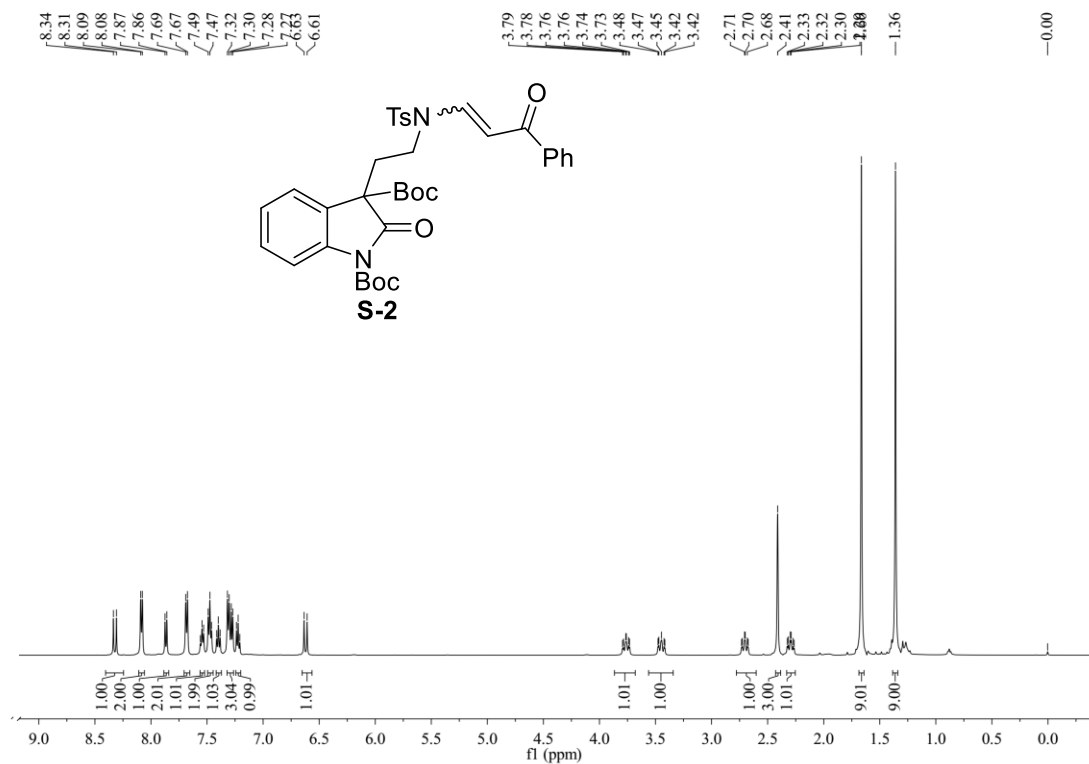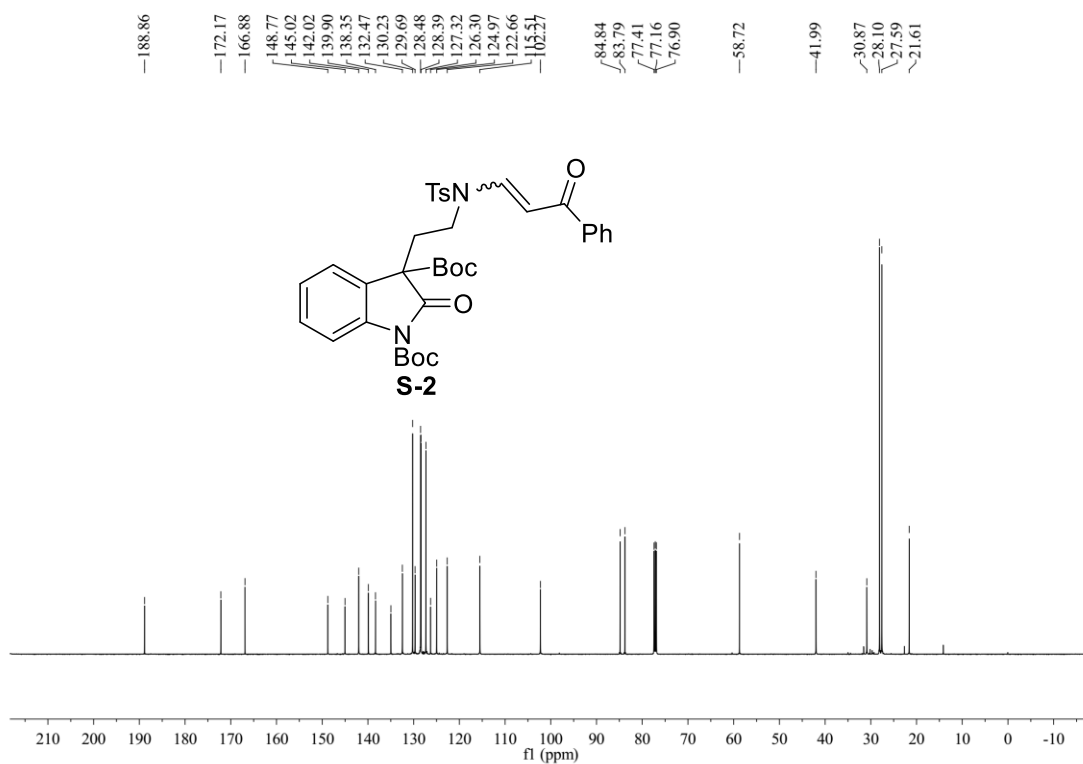



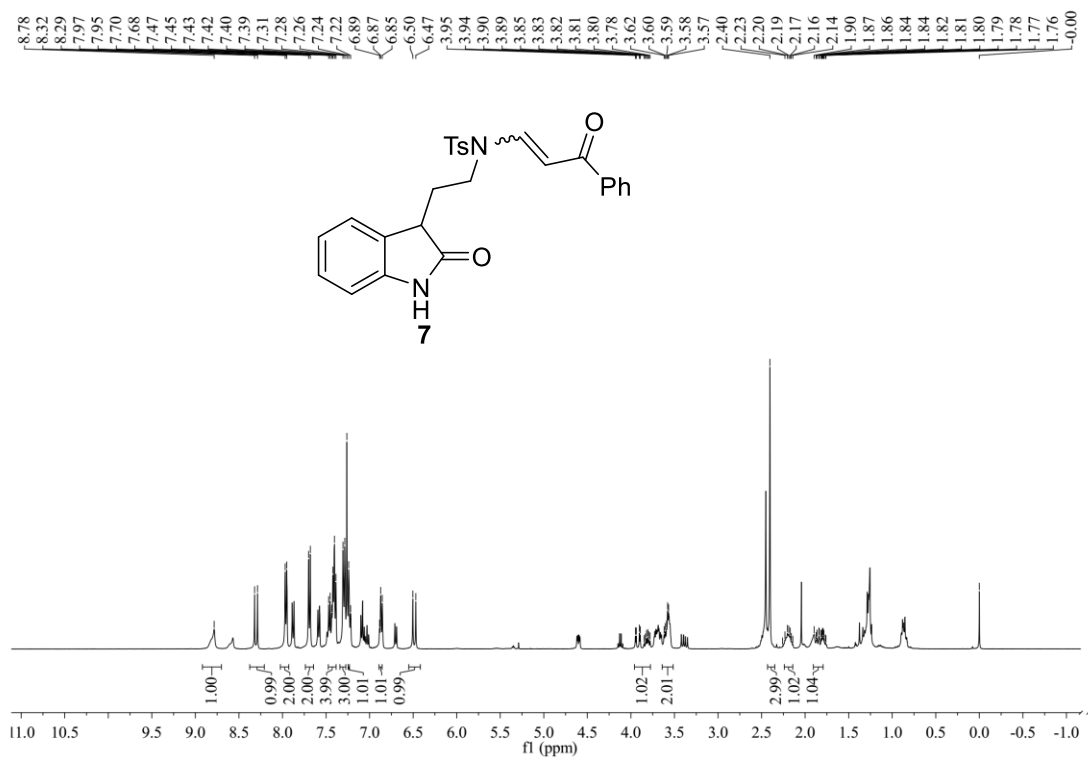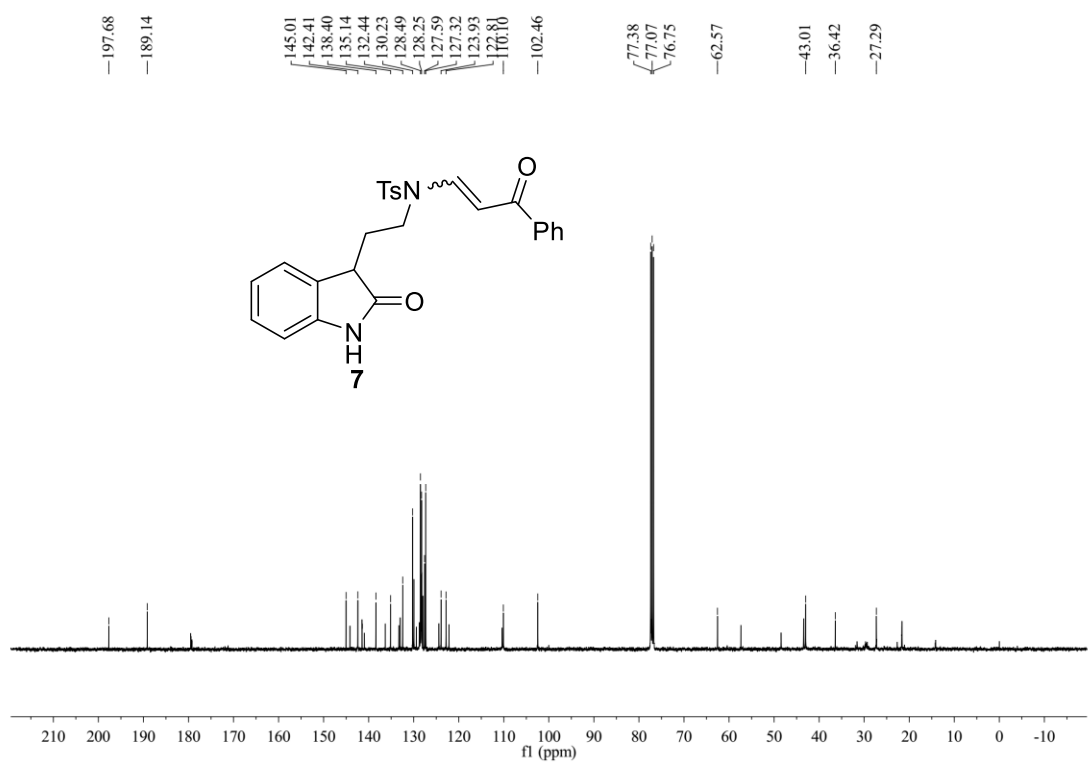

Supplement: c9cc04357h1.pdf [file c9cc04357h1.pdf]
